# Supplementary material
Source: PubMed Central journal article supplement (PMC4026508)
Supplement: 11606_2013_2724_MOESM1_ESM.pdf [file 11606_2013_2724_MOESM1_ESM.pdf]

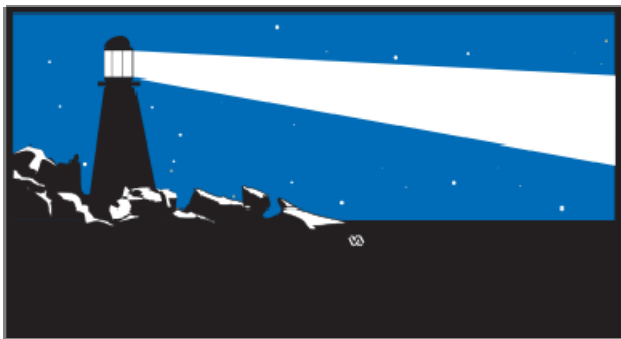

## **Materials used in the BEACON Implementation Trial**

**Best practices for End of life care And Comfort care Orders sets for our Nation's veterans**

Appendix A: Introduction to the BEACON Comfort Care Order Set

Appendix B: Instructions for Building a Comfort Care Order Set

Appendix C: PowerPoint Presentation for Training Staff

Appendix D: Brochure: Preparing for Your Loved One's Death

Appendix E: Pocket Card: When to Consider Palliative Care

Appendix F: Pocket Card: Identifying the Actively Dying Patient

Appendix G: Pocket Card: Comfort Care in the Last Hours of Life

Appendix H: Pocket Card: Opioid Equianalgesic Conversion Table

Appendix I: Pocket Card: Sharing Bad News

Appendix J: Pocket Card: Guidelines for Death Pronouncement

### **Contacts:**

For assistance with clinical applications:

F. Amos Bailey, MD

Co-PI: BEACON Project

Director, Safe Harbor Palliative Care Program

Birmingham VA Medical Center

700 South 19<sup>th</sup> Street, Birmingham, AL 35233

Telephone: 205-933-8101, ext 5355

Email: [amos.bailey@va.gov](mailto:amos.bailey@va.gov)

For questions regarding scientific aspects of the trial:

Kathryn L. Burgio, PhD

PI: BEACON Project

Associate Director for Research

Birmingham/Atlanta Geriatric Research, Education, and Clinical Center (GRECC)

Birmingham VA Medical Center, 11G

700 South 19<sup>th</sup> Street, Birmingham, AL 35233

Telephone: 205-558-7064

Email: [kburgio@uabmc.edu](mailto:kburgio@uabmc.edu)

## **INTRODUCTION TO THE BEACON COMFORT CARE ORDER SET**

### **Purpose of the Comfort Care Order Set**

The Comfort Care Order Set (CCOS) was developed as a decision support tool to improve the processes of end-of-life care for veterans dying in either the acute care wards or nursing home units (Community Living Centers (CLC)) of VA Medical Centers. Annually, in the United States, approximately 3 out of 4 deaths occur in institutional settings, with close to 50% of all deaths taking place in acute care hospitals and nearly 25% occurring in nursing homes. Although hospice is widely available, each year the number of home hospice deaths remains a minority, and it is unlikely that this will change in the foreseeable future. Therefore, it is important to optimize the provision of end-of-life care in acute and long-term institutional settings where the majority of deaths occur.

Research has demonstrated that end-of-life care in acute care and nursing home settings often is associated with unmet needs for pain and non-pain symptom control and assistance with social, emotional, and spiritual distress of both the patient and family. In addition to inadequate symptom recognition and management, iatrogenic suffering frequently results from routine medical care, such as IV infusions, blood work, testing, and monitoring that no longer benefits the dying patient. The CCOS has been carefully devised, based on best practices of care for the dying in home hospice.

The CCOS guides clinicians in changing the processes of end-of-life care and ensuring access to medications for symptom control. This is coupled with changes in all aspects of nursing and personal care. Appropriate disease managing therapies can be continued, while at the same time reducing restrictions and avoiding testing and treatments, when the burdens of these procedures outweigh the benefits. In this way, adopting the CCOS can enhance both the quality and quantity of life for our patients by individualizing care plans that take advantage of the resources of institutional care.

### **Evaluation of the Comfort Care Order Set**

The CCOS has been evaluated extensively. First, the components of the CCOS were compared with the practices and recommendations for provision of care for the dying patient in home settings. Second, each intervention component was evaluated individually for effectiveness, safety and application for individual physical symptoms.

The CCOS was tested for practical application at the Birmingham VAMC by evaluating its impact on processes of care for patients who died before and after implementation of the CCOS. Positive results included a marked increase in the number of patients for whom an opioid was ordered, as well as an increase in the number of veterans who received some opioids in the last 72 hours of life (from 13-72%). Effects on non-pharmacological processes included increases in documented goals of care and family presence at time of death, as well as reduction of deaths in

the ICU and reduced use of instrumentation. The practical application of the CCOS was also evaluated by observing medical providers using it. Modifications were made to improve ease of use and to encourage integration of the entire packet of the CCOS into care plans.

Review and observation of the end-of-life care provided by nurses, pharmacists, respiratory therapists, dieticians, and all other providers in the hospital revealed how they interpreted the CCOS in relation to their roles. Input from front-line providers identified barriers and concerns that were subsequently addressed through modifications, deletions, and additions to the CCOS. This work highlighted the importance not only of changing orders for processes of care, but also changing the culture of the facility. Educating and nurturing buy-in from the medical providers who order the CCOS, as well as those who implement the orders, is essential to ensuring that excellent end-of-life care is the institutional norm.

As of the end of 2013, the CCOS system was installed and tested at more than 20 VA Medical Centers.

### **Practical Application**

- The CCOS is a decision support tool with education and explanatory notes within each section to facilitate utilization. This includes guidance to consider the burdens and benefits of all interventions and orders, including both those in the CCOS and those already in place.
- The CCOS can be used by any clinician with the authority to write orders. Expertise in Palliative Medicine is not required.
- The CCOS can be used to plan care in any location within the medical center.
- The CCOS may be used to initiate symptom control for a consult while the patient remains on the current service. In this situation the CCOS serves as a tool for educating non-palliative care providers about symptom management.
- Clinicians may use all or part of the CCOS. They may wish to use only one section, such as the guidelines for treating delirium, to provide timely relief for patients in the ICU or some other setting.
- Some non-palliative care providers may decide to use parts of the CCOS to assist them with setting up a symptom control care plan independent of the Palliative Care specialist and/or before the Palliative Care team can see the patient in consultation.
- Palliative Care providers often use the CCOS to admit or transfer patients to their Hospice/Palliative Care service.
- Providers may open the CCOS to initiate some components, and return to the CCOS at a later time to refine the plan.

- The CCOS does not require the modification or discontinuation of disease modifying orders or treatments (such as change in resuscitation status to DNAR). To complement or supplement the current treatment plan, the CCOS can be layered onto existing disease modifying orders so the overall care plan aligns with the patient's goals of care.
- It is good practice to review all medications and orders on a regular basis to update orders and reconcile care plans with evolving goals of care.

### **The Importance of Providing Education**

It is important to have an education plan for clinicians who will be using the CCOS to place orders and for other team members who routinely carry out care plans.

Clinicians who will be using the CCOS to write orders need to understand where the order set is located and how to navigate the system to place orders. There may be a small core of clinicians who will use the order set routinely. These clinicians may be members of a Palliative Care team or work on a specific hospice or palliative care unit. Often, they can become educators.

Other clinicians may use the CCOS infrequently and/or with the assistance and guidance of the Palliative Care team. A physician working in the Emergency Unit or a hospitalist on an inpatient ward service or other location may need to use the CCOS to initiate symptom management before the Palliative Care team can provide a comprehensive evaluation and recommendations.

Because the CCOS affects all aspects of end-of-life care, it is important that all providers have some understanding of the program and how it may affect their area of patient care expertise. To support implementation of the CCOS, it is important for education to include nursing staff, respiratory therapists, dietitians, pharmacists, and any other providers for patients for whom a CCOS may be used.

For example, nursing staff may need to use subcutaneous lines, or the "offer may refuse" opioid order, rather than only IV or PO medications. Pharmacists may be unfamiliar with the use of sublingual morphine concentrate, because it has not been used previously in their facility. Dietary providers may not understand why a patient with a history of diabetes is permitted to have ice cream. Respiratory therapists need to understand that, for some patients, it may be more comfortable to use nasal cannula, instead of a face mask when patient comfort is the goal of care.

Staff education helps everyone understand how the CCOS concept works, how orders may be different from the usual routine, and the need for integration of the CCOS into the culture of the facility. To maintain consistency in provider knowledge, if the medical center has physicians in training (medical students, residents) who rotate through the hospital, their orientation program should include an introduction to the CCOS.



## Sections of the Comfort Care Order Set

### Section 1: Admit & Initiate Comfort Care Order Set

The "Admit and Initiate Comfort Care Order Set" section is used to initiate CCOS as part of the plan of care in any location in the medical center. For patients remaining in their current ward and bed section, the provider would start with "Initiate Comfort Care Order Set." (See the arrow below)

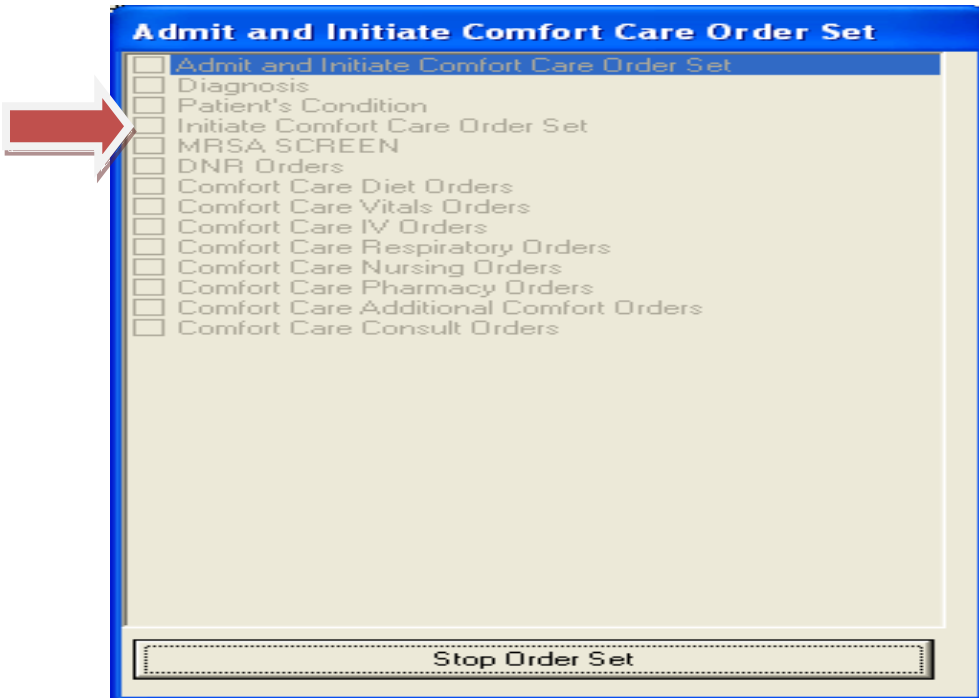

**Admit and Initiate Comfort Care Order Set**

- Admit and Initiate Comfort Care Order Set
- Diagnosis
- Patient's Condition
- Initiate Comfort Care Order Set
- MRSA SCREEN
- DNR Orders
- Comfort Care Diet Orders
- Comfort Care Vitals Orders
- Comfort Care IV Orders
- Comfort Care Respiratory Orders
- Comfort Care Nursing Orders
- Comfort Care Pharmacy Orders
- Comfort Care Additional Comfort Orders
- Comfort Care Consult Orders

Stop Order Set

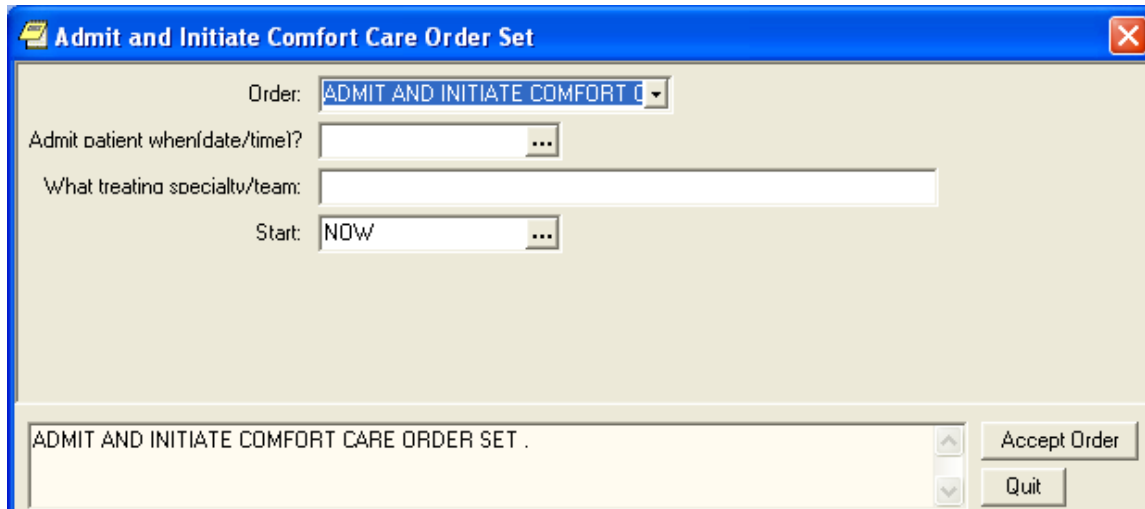

**Admit and Initiate Comfort Care Order Set**

Order: ADMIT AND INITIATE COMFORT C

Admit patient when(date/time)?

What treating specialt/team:

Start: NOW

ADMIT AND INITIATE COMFORT CARE ORDER SET .

Accept Order

Quit

**Diagnosis** ✖

Diagnosis:

---

Diagnosis :  ⬆ ⬇ Accept Order Quit

**Patient's Condition** ✖

Order:  ⬇

Enter condition:

Start:  ...

Stop:  ...

---

CONDITION :  ⬆ ⬇ Accept Order Quit

Section 2: Transfer & Initiate Comfort Care Order Set

**Transfer and Initiate Comfort Care Order Set**

- Transfer & Initiate Comfort Care Order Set
- Diagnosis
- Patient's Condition
- Initiate Comfort Care Order Set
- DNR Orders
- Comfort Care Diet Orders
- Comfort Care Vitals Orders
- Comfort Care IV Orders
- Comfort Care Respiratory Orders
- Comfort Care Nursing Orders
- Comfort Care Pharmacy Orders
- Comfort Care Additional Comfort Orders
- Comfort Care Consult Orders

Stop Order Set

**Transfer & Initiate Comfort Care Order Set**

Order: TRANSFER & INITIATE COMFORT

Date/time for transfer: ...

Required Statement: I have discussed the transfer of this patient with the following Attending Physician who has completely concurred with this action.

Attending physician: ...

Transfer patient to: ...

Stop: T+14 ...

TRANSFER & INITIATE COMFORT CARE ORDER SET :  
Transfer validation: I have discussed the transfer of this patient with the following Attending Physician who has completely concurred with this action.

Accept Order

Quit

The remainder of the transfer order set is identical to the admission order set.

### Section 3: DNR/DNI Orders

This section prompts providers to document and place orders reflecting the patient's current Advance Care Plan and resuscitation preferences.

**DNR Orders** Next

**Per Policy Resident DNR/DNI order active X 24hr after discussing with Attending**

DNI X 24 HOURS (RESIDENT ORDER)

DNI ATTENDING ORDER

DNR X 24 HRS (RESIDENT ORDER)

DNR ATTENDING ORDER

REMOVE DNI (REMOVES DNI POSTING FROM COVER SHEET)

REMOVE DNR (REMOVES DNR POSTING FROM COVER SHEET)

### Section 4: Diet Orders

Full liquid diet is the default setting. This section also includes orders for encouraging family to engage the patient in pleasure eating/feeding through provision of favorite foods.

**Comfort Care Diet Orders** Next

**DIET: Patient may improve and desire to taste food.**  
**Order full liquid instead of clear liquid. More palatable.**  
**Easier to swallow. Less likely to cause aspiration. Advance as tolerated.**

1 Diet / Nutrition Orders

2 Full Liquid Diet

← 3 May have food brought in by family

← 4 Allow patient to sit up for meals. Assist to eat.

## Section 5: Nursing Orders

This section includes orders that promote patient comfort and safety, facilitate environmental modifications to reduce or prevent delirium, and encourage family presence and assistance.

| Comfort Care Nursing Orders                                                                                                                                                                                                 |                                                                                              | Next |
|-----------------------------------------------------------------------------------------------------------------------------------------------------------------------------------------------------------------------------|----------------------------------------------------------------------------------------------|------|
| <b>NURSING:</b>                                                                                                                                                                                                             |                                                                                              |      |
| <b>TIPS FOR COMFORT/SAFETY:</b>                                                                                                                                                                                             |                                                                                              |      |
| <b>Comforting measures. Reposition. Massage. Speak to patient.</b>                                                                                                                                                          |                                                                                              |      |
| <b>Soft music. Avoid sensory overload (TV).</b>                                                                                                                                                                             |                                                                                              |      |
| ← 1                                                                                                                                                                                                                         | Please weigh on admission to Safe Harbor and weekly on Mondays thereafter                    |      |
| ← 2                                                                                                                                                                                                                         | For CHF please weigh daily                                                                   |      |
| ← 3                                                                                                                                                                                                                         | May discontinue lab tests and daily wts and SCD's and subq Heparin and discontinue telemetry |      |
| ← 4                                                                                                                                                                                                                         | RN may change form of medicine and route of administration. No IM meds                       |      |
| ← 5                                                                                                                                                                                                                         | Keep hearing aid and dentures and glasses on pt.                                             |      |
| 6                                                                                                                                                                                                                           | Audiology consult:obtain amplifier for HOH patient                                           |      |
| <b>ACTIVITY: AVOID RESTRAINTS. Patient may need one on one sitter.</b>                                                                                                                                                      |                                                                                              |      |
| <b>Begin environment modifications:</b>                                                                                                                                                                                     |                                                                                              |      |
| ← 7                                                                                                                                                                                                                         | OOB to chair BID and preferably outside                                                      |      |
| ← 8                                                                                                                                                                                                                         | Open curtain during day.                                                                     |      |
| ← 9                                                                                                                                                                                                                         | Decrease unnecessary noise (turn off TV)                                                     |      |
| ← 10                                                                                                                                                                                                                        | Redirect ~ Reposition ~ Speak quietly                                                        |      |
| ← 11                                                                                                                                                                                                                        | Provide nightlight when sleeping.                                                            |      |
| ← 12                                                                                                                                                                                                                        | Please allow family to stay with patient in room                                             |      |
| <b>ASSISTING FAMILY:</b>                                                                                                                                                                                                    |                                                                                              |      |
| <b>Advise family about alerting their family members as to gravity of pt status. Arrange family visits of military relatives by contacting Red Cross and of incarcerated relatives by contacting warden. SW may assist.</b> |                                                                                              |      |
| ← 12                                                                                                                                                                                                                        | Please give family "Preparing For Your Loved One's Loss"                                     |      |

## Section 6: Vital Signs

Vital sign orders allow for customization of vital sign monitoring that de-emphasizes frequency and refocuses on symptom assessment, comfort, and effectiveness of interventions. The call-back parameters are based on control of symptom assessment rather than specific numbers.

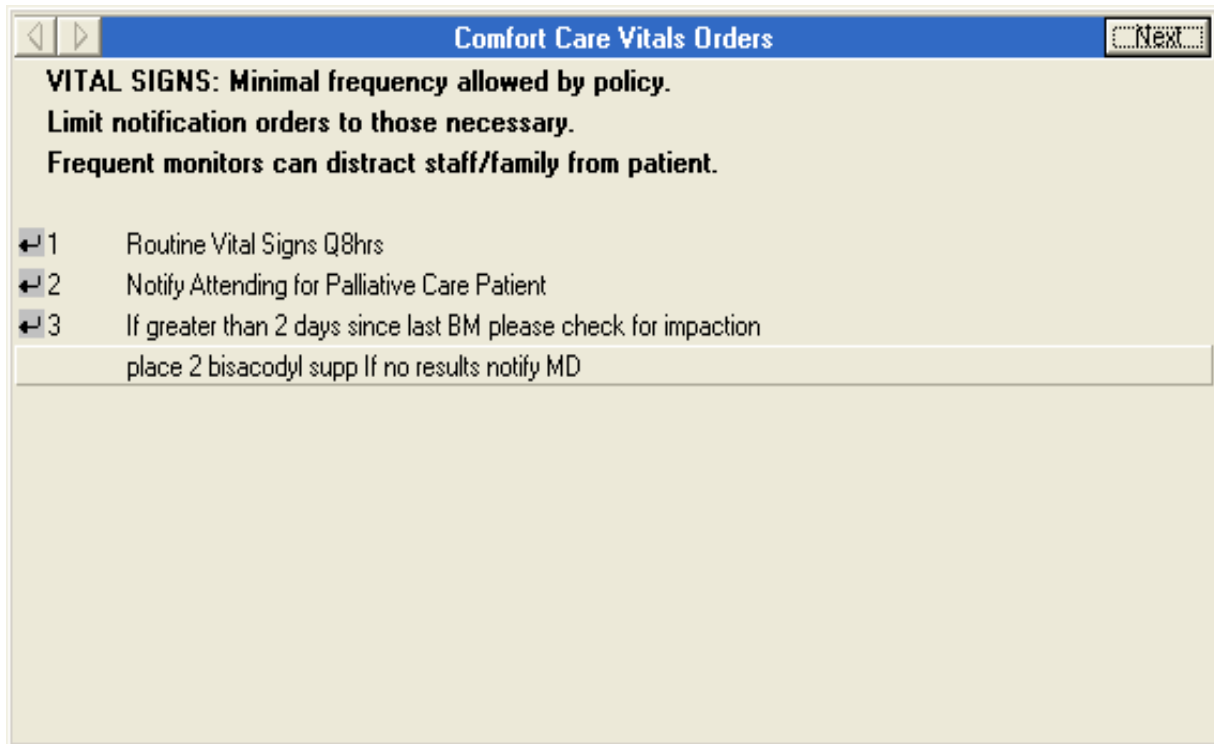

The screenshot shows a software window titled "Comfort Care Vitals Orders" with a "Next" button in the top right corner. The window contains the following text:

**VITAL SIGNS: Minimal frequency allowed by policy.**  
**Limit notification orders to those necessary.**  
**Frequent monitors can distract staff/family from patient.**

Below this text is a list of three items, each with a left-pointing arrow icon:

- 1 Routine Vital Signs Q8hrs
- 2 Notify Attending for Palliative Care Patient
- 3 If greater than 2 days since last BM please check for impaction

A text box below the list contains the text: "place 2 bisacodyl supp If no results notify MD".

## Section 7: Activity Orders

This section includes orders for environmental modifications to reduce or prevent delirium and that encourage patient, family and staff to facilitate activity and positioning that maximizes patient comfort, safety, and choice.

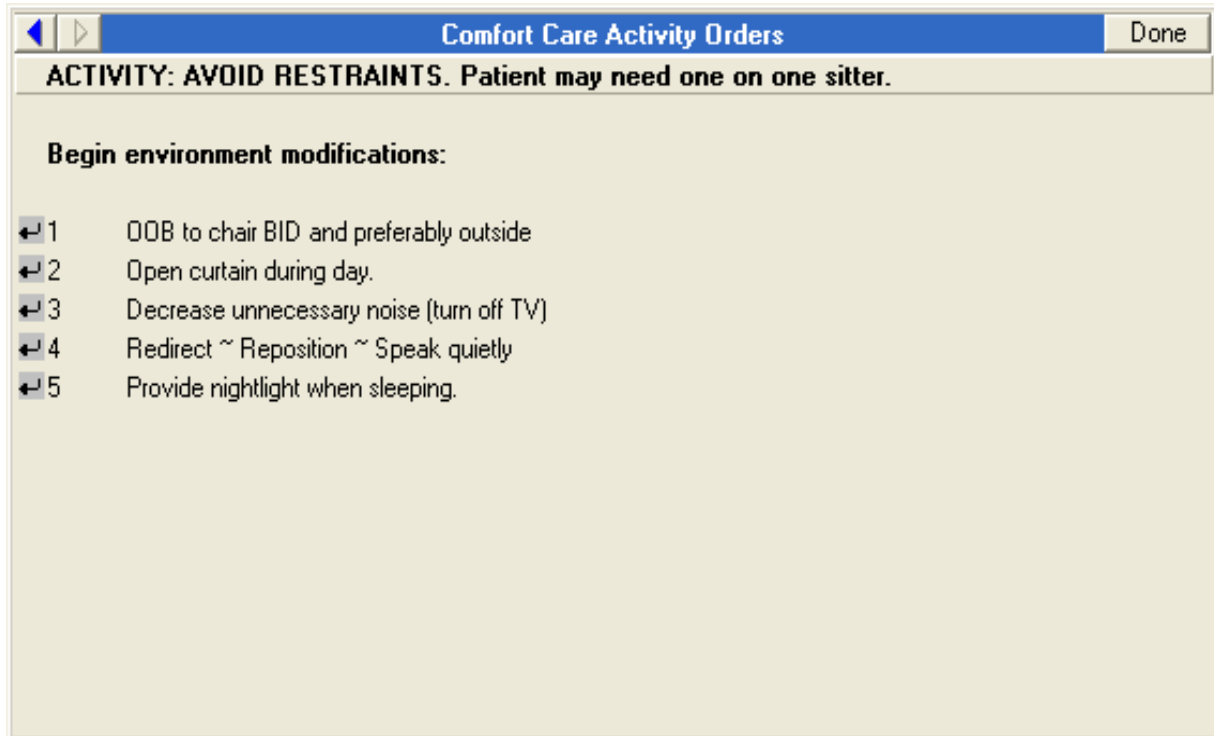

The screenshot shows a software window with a blue title bar containing the text "Comfort Care Activity Orders" and a "Done" button on the right. Below the title bar is a yellow header area with the text "ACTIVITY: AVOID RESTRAINTS. Patient may need one on one sitter." The main content area is white and contains the following text:

**Begin environment modifications:**

- ←1 OOB to chair BID and preferably outside
- ←2 Open curtain during day.
- ←3 Decrease unnecessary noise (turn off TV)
- ←4 Redirect ~ Reposition ~ Speak quietly
- ←5 Provide nightlight when sleeping.

## Section 8: IV Considerations (IV and Subcutaneous therapy)

Parenteral hydration may play a role in patient comfort at life's end. However, volume overload is a common iatrogenic problem in the inpatient setting at end of life. In addition, maintaining an IV site often causes pain, increases risk of infection and promotes the use of restraints. The subcutaneous line is a low burden option for parenteral access in almost all patients and can be used for parenteral access for medications, and in some clinical situations, the provision of fluids.

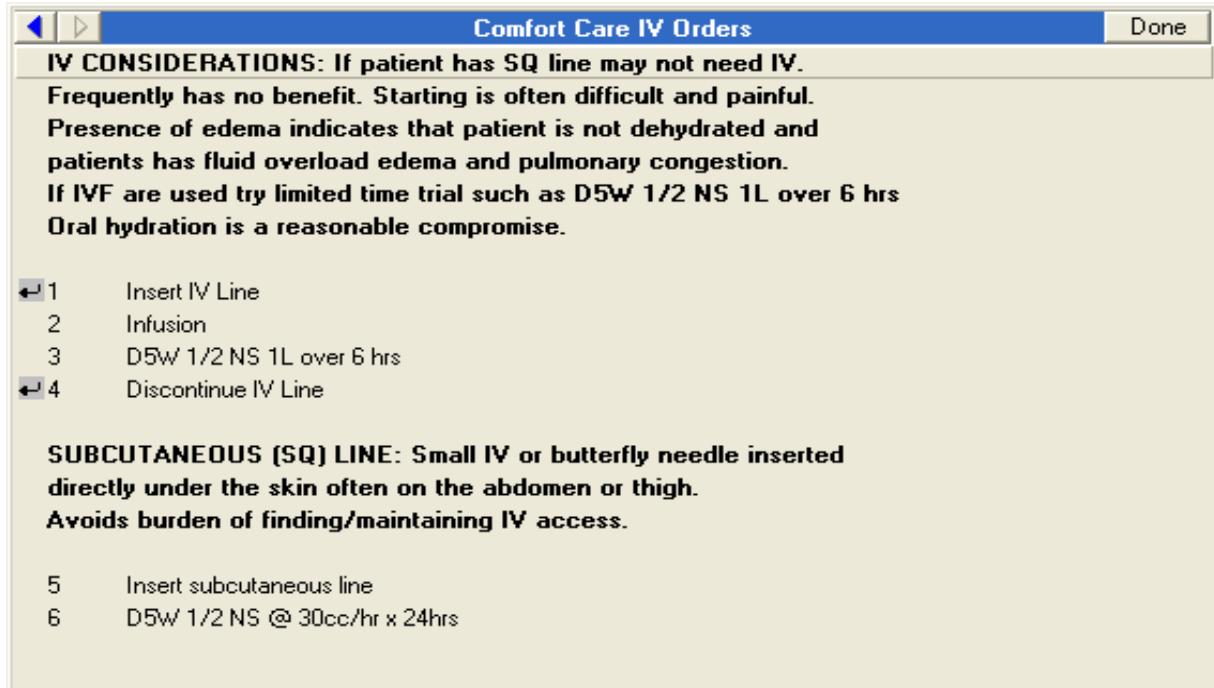

**Comfort Care IV Orders** Done

**IV CONSIDERATIONS: If patient has SQ line may not need IV.**  
**Frequently has no benefit. Starting is often difficult and painful.**  
**Presence of edema indicates that patient is not dehydrated and patients has fluid overload edema and pulmonary congestion.**  
**If IVF are used try limited time trial such as D5W 1/2 NS 1L over 6 hrs**  
**Oral hydration is a reasonable compromise.**

- 1 Insert IV Line
- 2 Infusion
- 3 D5W 1/2 NS 1L over 6 hrs
- 4 Discontinue IV Line

**SUBCUTANEOUS (SQ) LINE: Small IV or butterfly needle inserted directly under the skin often on the abdomen or thigh.**  
**Avoids burden of finding/maintaining IV access.**

- 5 Insert subcutaneous line
- 6 D5W 1/2 NS @ 30cc/hr x 24hrs



## Section 9: Respiratory Orders

Oxygen therapy is a potent symbol of medical care. Face masks often are uncomfortable and burdensome, making patients feel more claustrophobic and dyspnic. The orders in this section focus on patient comfort of the patient as the primary goal and correction of hypoxia as a secondary concern. For most patients at end of life, correction of hypoxia will not be a feasible goal, but symptom control will.

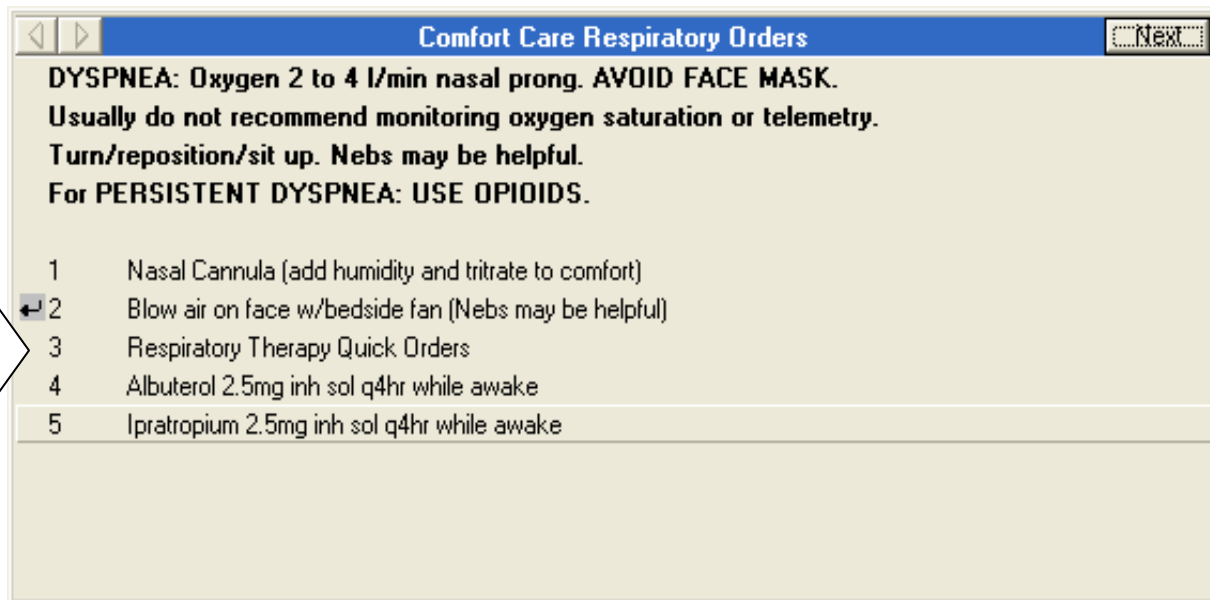

The screenshot shows a software window with a blue title bar that reads "Comfort Care Respiratory Orders" and a "Next" button in the top right corner. The main content area contains the following text:

**DYSPNEA: Oxygen 2 to 4 l/min nasal prong. AVOID FACE MASK.**  
**Usually do not recommend monitoring oxygen saturation or telemetry.**  
**Turn/reposition/sit up. Nebbs may be helpful.**  
**For PERSISTENT DYSPNEA: USE OPIOIDS.**

Below the text is a list of five items, each with a number and a description:

- 1 Nasal Cannula (add humidity and titrate to comfort)
- 2 Blow air on face w/bedside fan (Nebbs may be helpful)
- 3 Respiratory Therapy Quick Orders
- 4 Albuterol 2.5mg inh sol q4hr while awake
- 5 Ipratropium 2.5mg inh sol q4hr while awake

A white arrow points to the left of item 2, and a small grey square with a white arrow points to the left of item 2.

This is an example of a component submenu. In this case, it is for the standard quick orders for respiratory therapy, but it can be a submenu to any quick order set a hospital may construct.

| Respiratory Therapy Quick Orders |                                                  | Next                                                                     |
|----------------------------------|--------------------------------------------------|--------------------------------------------------------------------------|
| 1                                | Oxygen Mask @ (FIO2)                             | <b>RESP THERAPY MEDS:</b>                                                |
| 2                                | Oxygen Nasal Cannula @ (Rate)                    |                                                                          |
| 3                                | Ventilator & (Mode)                              | ← 30 Racemic Epinephrine/NS NOW                                          |
| 4                                | Incentive Spirometry                             | ← 31 Racemic Epinephrine/NS Q30min X3                                    |
| 5                                | Pulse Oximetry (@ Rate)                          | ← 32 Atrovent 0.5mg/NS Q2hr NEB                                          |
|                                  |                                                  | ← 33 Atrovent 0.5mg/NS Q4hr NEB                                          |
| 6                                | Suction                                          | 34 Atrovent 0.5mg/NS QID NEB                                             |
| 7                                | Turn/Cough/Deep Breathe (TCDB)                   | ← 35 Albuterol 2.5mg/NS NEB Now                                          |
| 8                                | Sputum Induction                                 | ← 36 Albuterol 2.5mg/NS Q2hr NEB                                         |
| 9                                | Trach/Laryngectomy Care                          | ← 37 Albuterol 2.5mg/NS Q4hr NEB                                         |
| 10                               | Chest Percussion/Postural<br>Drainage (CPPD)     | 38 Albuterol 2.5mg/NS QID NEB                                            |
|                                  |                                                  | 39 Ventilator Bronchodilator Protocol                                    |
| 11                               | Vibro-percussion                                 |                                                                          |
| ← 12                             | Request fan for pt bedside (Nebbs maybe helpful) | 99 Other Respiratory Therapy Orders<br>(Free Text - not for medications) |
| 20                               | Home O2 Evaluation                               |                                                                          |

## Section 10: Pain & Dyspnea (Opioids)

Opioids are a key medication for pain and dyspnea; however, these medications frequently are under-utilized in the inpatient setting at end of life. The orders in this section are designed to encourage frequent symptoms assessment. They employ a scheduled "offer - may refuse" approach which increases the opportunity for patients to request and receive treatment and raises provider comfort with ordering and administering pain medication.

Comfort Care Opioid Orders Next

**PAIN AND DYSPNEA (OPIOIDS): Opioids usually most effective.**  
**Calculate morphine equivalents used in recent past adjust as needed.**  
**SL q2hr offer patient may refuse.**  
**PO meds offer longer duration of action then IV/subQ.**  
**Morphine PO to IV equivalent is 3:1.**

- 1 Morphine 5mg SL Q2hr
- 2 Morphine 5mg PO Q2hr
- 3 Morphine 2mg SQ Q2hr
- 4 Morphine 1mg IV PCA Pump per Protocol
- 5 Morphine 500mg/NS 50ml SQ Infusion
- 6 Oxycodone

**CONSTIPATION: Initiate if on opioids or no BM x 2 days.**

- 7 Please check for impaction
- 8 Bisacodyl 5mg PO BID
- 9 Senosides 17.2mg PO BID (may crush)
- 10 Docusate 250mg PO BID
- 11 MOM 30ml PO DAILY PRN constipation
- 12 Lactulose 30gm/45ml DAILY
- 13 Bisacodyl SUPP 10MG PR DAILY PRN
- 14 FLeets enema PR DAILY PRN

**PAIN DYSPNEA ANOREXIA ASTHENIA AND DEPRESSION: (Corticosteroid).**  
**Dexamethasone has less mineral corticoid effect than Prednisone.**  
**AM dosing prefered due to insomnia.**  
**Dexamethasone 1mg is equivalent to Prednisone 6mg.**

- 15 Dexamethasone 4 to 8 mg PO BID with meals
- 16 Dexamethasone 4 to 8 mg SQ BID (subq not compatible with hydromophone)

## Section 11: Nausea & Delirium (Phenothiazines)

Haloperidol is both an effective anti-emetic and the mainstay of treatment for delirium at end of life. Addressing multiple symptoms with the same medication helps simplify symptom management at end of life.

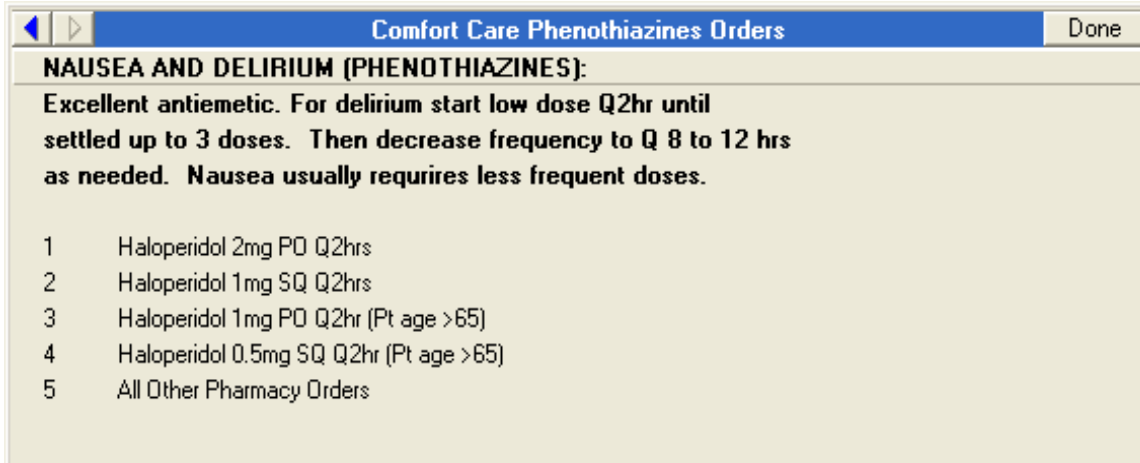

**Comfort Care Phenothiazines Orders** Done

**NAUSEA AND DELIRIUM (PHENOTHIAZINES):**  
**Excellent antiemetic. For delirium start low dose Q2hr until settled up to 3 doses. Then decrease frequency to Q 8 to 12 hrs as needed. Nausea usually requires less frequent doses.**

- 1 Haloperidol 2mg PO Q2hrs
- 2 Haloperidol 1mg SQ Q2hrs
- 3 Haloperidol 1mg PO Q2hr (Pt age >65)
- 4 Haloperidol 0.5mg SQ Q2hr (Pt age >65)
- 5 All Other Pharmacy Orders

## Section 12: Anxiety & Seizures (Benzodiazepines)

Lorazepam is an effective medication for anxiety, which when given parenterally, is an effective anti-convulsant. Warnings about the potential of lorazepam to complicate treatment for delirium are imbedded in each order.

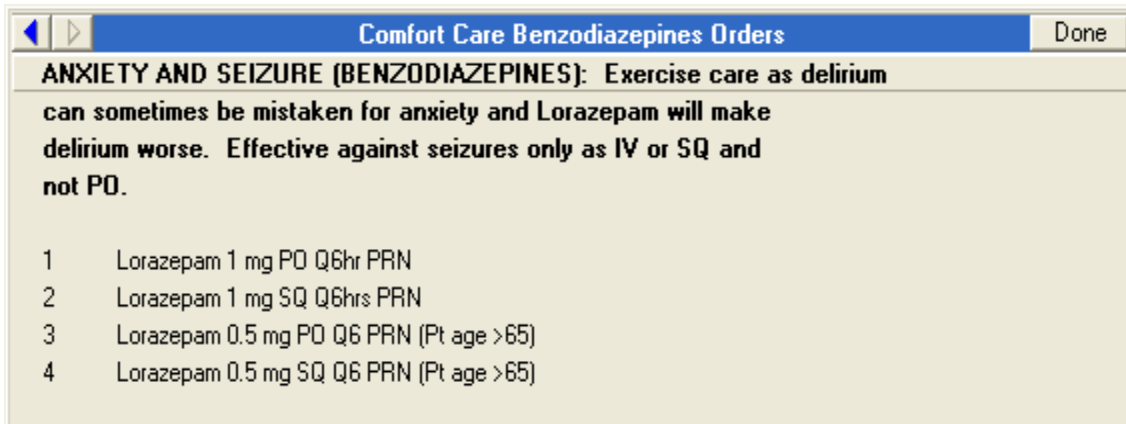

**Comfort Care Benzodiazepines Orders** Done

**ANXIETY AND SEIZURE (BENZODIAZEPINES): Exercise care as delirium can sometimes be mistaken for anxiety and Lorazepam will make delirium worse. Effective against seizures only as IV or SQ and not PO.**

- 1 Lorazepam 1 mg PO Q6hr PRN
- 2 Lorazepam 1 mg SQ Q6hrs PRN
- 3 Lorazepam 0.5 mg PO Q6 PRN (Pt age >65)
- 4 Lorazepam 0.5 mg SQ Q6 PRN (Pt age >65)

### Section 13: Pain Dyspnea, Anorexia, Asthenia & Depression: (Corticosteroid)

Dexamethasone is an effective adjuvant for many patients. It is easier to convert from oral to parenteral routes when the same medication and dosages are used with both routes.

**Comfort Care Corticosteroid Orders** Done

**PAIN DYSPNEA ANOREXIA ASTHENIA AND DEPRESSION: (Corticosteroid).**

**Dexamethasone has less mineral corticoid effect than Prednisone.**

**AM dosing preferred due to insomnia.**

**Dexamethasone 1mg is equivalent to Prednisone 6mg.**

10 Dexamethasone 4 to 8 mg PO BID with meals

11 Dexamethasone 4 to 8 mg SQ BID (subq not compatible with hydromorphone)

### Section 14: Constipation

Constipation is a common symptom at end of life. The constipation orders occur earlier in the opioid order section to encourage ordering a bowel regimen at the time the pain medication is ordered. In this section, constipation orders facilitate timely symptom identification and modification in the laxative therapy plan.

**Comfort Care Constipation Orders** Done

**CONSTIPATION: Initiate if on opioids or no BM x 2 days.**

1 Please check for impaction

2 Bisacodyl 5mg PO BID

3 Sennosides 17.2mg PO DAILY (may crush)

4 Docusate 250mg PO BID

5 MOM 30ml PO DAILY PRN constipation

6 Lactulose 30gm/45ml DAILY

7 Bisacodyl SUPP 10MG PR DAILY PRN

8 FLeets enema PR DAILY PRN

## Section 15: Death Rattle Orders

Loud, congested, and moist sounding respirations are a common symptom at the end of life. These death rattles are distressing to the family and staff.

| Comfort Care Death Rattle Orders                                      |                                                                  | Done |
|-----------------------------------------------------------------------|------------------------------------------------------------------|------|
| <b>DEATH RATTLE: Keep back of throat dry by turning head to side.</b> |                                                                  |      |
| <b>Stop IVF or tube feeding.</b>                                      |                                                                  |      |
| 1                                                                     | Scopolamine patch behind ear Q 3 days                            |      |
| 2                                                                     | Atropine drops in back of throat Q4hr PRN                        |      |
| 3                                                                     | Glycopyrrolate 0.2/ml IV Q6hr                                    |      |
| 4                                                                     | Glycopyrrolate 0.2/ml SUBQ Q6hr                                  |      |
| 5                                                                     | Yankauer suction to bedside. Avoid deep suctioning               |      |
| 6                                                                     | Cleanse mouth with Spongettes Q4hrs. Instruct family how to use. |      |

## Section 16: Additional Comfort Medications

While some patients may not need any of these adjuvant medications for specific problems at the end of life, others would benefit from many of the options.

| Comfort Care Additional Comfort Orders                        |                                                               | Done |
|---------------------------------------------------------------|---------------------------------------------------------------|------|
| <b>Please schedule medication if symptoms are continuous.</b> |                                                               |      |
| <b>Fever:</b>                                                 |                                                               |      |
| 1                                                             | Acetaminophen tab 650mg po q 4hr prn                          |      |
| 2                                                             | Acetaminophen supp 650mg pr q 4hr prn                         |      |
| <b>Insomnia:</b>                                              |                                                               |      |
| 3                                                             | Trazodone 25mg po qhs prn                                     |      |
| <b>Dry eyes:</b>                                              |                                                               |      |
| 4                                                             | Methylcellulose 0.4% opth sol 2 gtt each eye q6hr             |      |
| 5                                                             | Lacri Lube opth oint thin ribbon of Lacri Lube both eyes 6qhr |      |
| <b>Sore mouth:</b>                                            |                                                               |      |
| 6                                                             | Mylanta benedryl lidocaine visc susp 30cc po ac prn           |      |
| 7                                                             | Cetylpyridinium mouthwash 1 rinse of 0.05% topical qid prn    |      |
| <b>Thrush:</b>                                                |                                                               |      |
| 8                                                             | Nystatin 100000UT/ml 5ml po qid x 7d                          |      |
| <b>Sore throat:</b>                                           |                                                               |      |
| 9                                                             | Phenol spray 1.4% 2puffs of 1.4% qid                          |      |
| <b>Cough:</b>                                                 |                                                               |      |
| 10                                                            | Guaifenesin 100mg/5ml po q6hr                                 |      |
| <b>Hiccoughs:</b>                                             |                                                               |      |
| 11                                                            | Baclofen 10mg po tid prn                                      |      |
| 12                                                            | Chlorpromazine 25mg po q6hr prn                               |      |
| <b>Dyspepsia:</b>                                             |                                                               |      |
| 13                                                            | Maalox plus extr str 30ml po q6hr prn                         |      |
| 14                                                            | Ranitidine 150mg po bid                                       |      |
| 15                                                            | Omeprazole 20mg po qd                                         |      |
| <b>Diarrhea:</b>                                              |                                                               |      |
|                                                               | Call MD for Lomotil & C.Diff orders.                          |      |
| 16                                                            | Pepto Bismol 262mg qid prn                                    |      |
| <b>Dysuria:</b>                                               |                                                               |      |
| 17                                                            | Phenazopyridine 100mg po tid x 2d                             |      |

## Section 17: Consults

This section prompts participation of the core members of the Palliative Care team and the providers in the specialty services of the specific medical center.

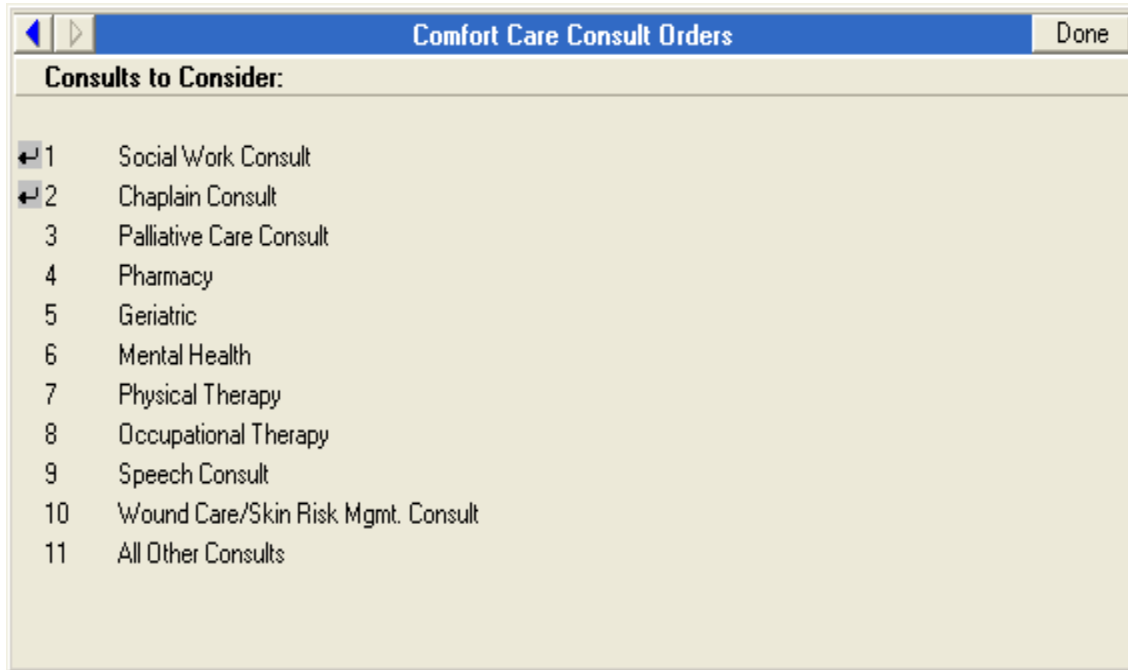

Comfort Care Consult Orders Done

**Consults to Consider:**

- 1 Social Work Consult
- 2 Chaplain Consult
- 3 Palliative Care Consult
- 4 Pharmacy
- 5 Geriatric
- 6 Mental Health
- 7 Physical Therapy
- 8 Occupational Therapy
- 9 Speech Consult
- 10 Wound Care/Skin Risk Mgmt. Consult
- 11 All Other Consults



# Comfort Care Order Set

F. Amos Bailey MD  
Director, Safe Harbor Palliative Care  
Birmingham VA Medical Center  
Professor  
Division of Gerontology, Geriatrics, and Palliative Care  
University of Alabama at Birmingham  
Birmingham, Alabama

## Locating the Comfort Care Order Set

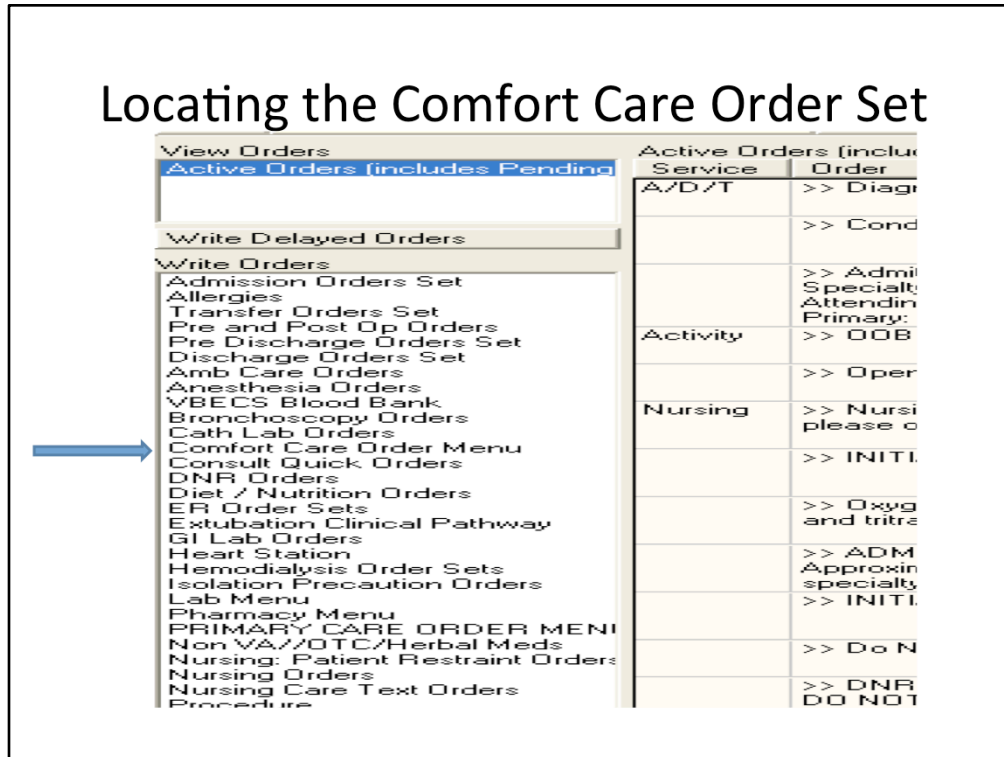

The Comfort Care Order Set should be placed in one or more locations so that it can be used readily. Most facilities place it in the section "Write Orders" for use by all providers who have the authority to write orders.

From this location you can open the CCOS and use orders to start symptom control for a patient that will continue to be cared for on that unit.

You may also want to use the CCOS to write delayed orders for a patient that will be transferred to a new unit in the VAMC or is being admitted to the VAMC.

If you have Palliative/Hospice Beds, orders can be copied into delayed orders and the option to change bed section to TS 96 in the CLC or to 1F for Hospice in Acute Care in the acute care section may be chosen.

## Open the CCOS in Active Orders or Delayed Orders.

The screenshot shows a software interface with a left-hand menu and a main content area. The left menu has a 'View Orders' section with 'Active Orders (includes Pending)' selected, and a 'Write Orders' section with 'Write Delayed Orders' highlighted. A blue arrow points to the 'Active Orders' tab, and another points to the 'Write Delayed Orders' button. The main content area displays a table of active orders.

| Active Orders (includes Pending & Recent Activity) |                                                                                                                                     |
|----------------------------------------------------|-------------------------------------------------------------------------------------------------------------------------------------|
| Service                                            | Order                                                                                                                               |
| A/D/T                                              | >> Diagnosis : Pain Crisis                                                                                                          |
|                                                    | >> Condition : POOR .                                                                                                               |
|                                                    | >> Admit to Hospice for Acute Care<br>Specialty: HOSPICE FOR ACUTE CA<br>Attending: LEIGH,ALEXANDRA E<br>Primary: LEIGH,ALEXANDRA E |
| Activity                                           | >> OOB to chair BID and preferably ot                                                                                               |
|                                                    | >> Open curtain during day.                                                                                                         |
| Nursing                                            | >> Nursing Care:<br>please order Pegasus air mattress .                                                                             |

At this point, the provider may choose to open the CCOS and select orders that are needed by the patient.

A provider can write orders for immediate use and, at the same time, write a complete admission order set for the patient in the delayed order set that would be used if the patient is being moved to a different location (such as transfer out for the ICU to a CLC/ Hospice in Acute Care Bed).

A provider could also use the Delayed Order set if changing the bed section, but not changing geographic location.

The next slide will demonstrate the Delayed Order Writing Option.

# Writing Delayed Transfer Order

Use Transfer: if inpatient will move from one ward o

Release new orders immediately

Delay release of new order(s) until

Event Delay List:

Transfer to Blind Rehab  
Transfer to Cardiovascular Surgery  
Transfer to E.N.T.  
Transfer to General Medicine  
Transfer to General Surgery  
Transfer to Gynecology  
Transfer to Head & Neck Surgery  
Transfer to Hospice for Acute Care  
Transfer to Medical ICU/CCU  
Transfer to Neurology  
Transfer to Neurosurgery  
Transfer to Ophthalmology  
Transfer to Oral Surgery  
Transfer to Orthopedic Surgery  
Transfer to Plastic Surgery  
Transfer to SICU/CVICU  
Transfer to Thoracic Surgery  
Transfer to Urology (GU)  
Transfer to Vascular

Admit to Blind Rehab  
Admit to Cardiac Surgery  
Admit to Cardiovascular Surgery  
Admit to E.N.T.  
Admit to General Medicine  
Admit to General Surgery  
Admit to Gynecology  
Admit to Head & Neck Surgery  
Admit to Hospice for Acute Care  
Admit to Medical I.C.U./C.C.U.  
Admit to Neurology  
Admit to Neurosurgery  
Admit to Ophthalmology

## Opening Delayed Orders

Choose to have patient admitted to VAMC under the appropriate bed section, such as TS 96 or 1F.

If the patient has already been admitted to the VAMC and you want to change the bed section, you can use the "Transfer to" option at the top of this window.

Note that you may be changing the bed section designation, but not changing the location of the bed. In that case you do have to enter new orders, and using the Delayed Orders is the best option to do this without the patient having a break in orders that could cause poor symptom control .

# Comfort Care Order Set

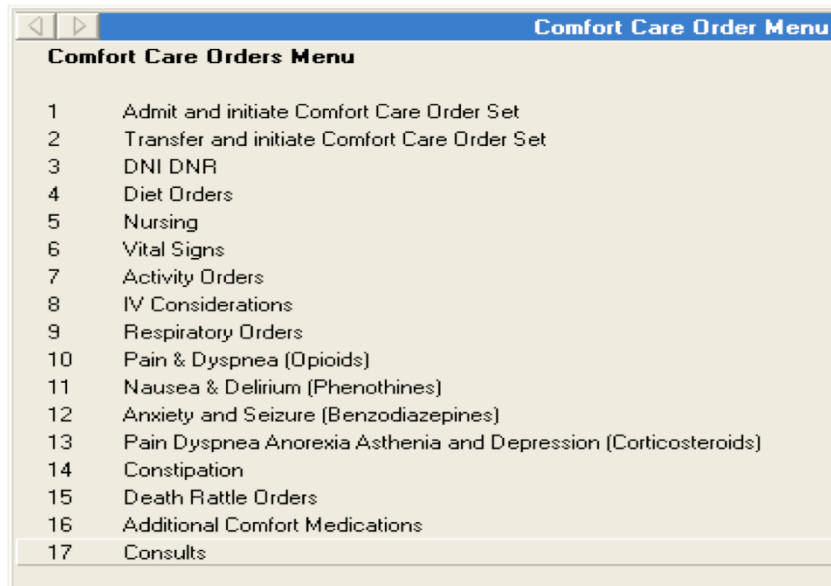

The screenshot shows a software interface titled "Comfort Care Order Menu". It features a blue header bar with navigation arrows and the title. Below the header is a list of 17 items, each with a number and a description. The list is as follows:

| Comfort Care Orders Menu |                                                                 |
|--------------------------|-----------------------------------------------------------------|
| 1                        | Admit and initiate Comfort Care Order Set                       |
| 2                        | Transfer and initiate Comfort Care Order Set                    |
| 3                        | DNI DNR                                                         |
| 4                        | Diet Orders                                                     |
| 5                        | Nursing                                                         |
| 6                        | Vital Signs                                                     |
| 7                        | Activity Orders                                                 |
| 8                        | IV Considerations                                               |
| 9                        | Respiratory Orders                                              |
| 10                       | Pain & Dyspnea (Opioids)                                        |
| 11                       | Nausea & Delirium (Phenothines)                                 |
| 12                       | Anxiety and Seizure (Benzodiazepines)                           |
| 13                       | Pain Dyspnea Anorexia Asthenia and Depression (Corticosteroids) |
| 14                       | Constipation                                                    |
| 15                       | Death Rattle Orders                                             |
| 16                       | Additional Comfort Medications                                  |
| 17                       | Consults                                                        |

This is the appearance of the Comfort Care Order Set when you select the option in the “Write Orders” tab. At this point, you could start at the top and work your way through the list. It is recommended that a provider work through all of the sections a few times to become familiar with the CCOS. After using the CCOS for 3-5 times, a provider can write a complete set of orders in about 5 minutes.

It is encouraged to go through all of the parts of the order sets, so that some important aspect of care is not inadvertently overlooked. Also, it is a good practice to place an order for medication for pain, for delirium, or for other symptoms preemptively, so that if the patient develops symptoms later during the night, the staff is able to respond quickly.

On other occasions, you may want to select only a few options for a specific problem, such as management of secretions and go to that section of the order set directly.

## If a Section of the CCOS has been opened it becomes Blue

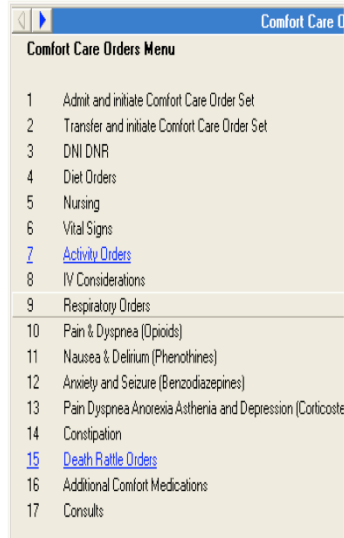

**Click on done to exit**  
**Click on blue arrow (top left) to return to previous menu**  
**Click on IV Considerations below to continue in the order set**  
IV Considerations

This prompts you to remember which sections you have already completed. If you change your mind and want to go back into that section to modify your orders, you can do that without having to close and reopen the CCOS.

Below is a navigation tool that is placed at the end of each section. Note that the “Done” button intuitively seems like the button to use to continue, but it actually closes the order set. This set of instructions and the construction of the order set allows the clinician to go back to the option page or progress to the next option in the list.

**Click on done to exit**  
**Click on blue arrow (top left) to return to previous menu**  
**Click on IV Considerations below to continue in the order set**  
IV Considerations

# Using the Comfort Care Order Set

**Admit and Initiate Comfort Care Order Set**

Order: ADMIT TO AND INITIATE COMFOF

Admit patient when/date/time? Jul 30, 2010 @ 12:00 ...

What treating specialty/team: |

Start: HOSPICE FOR ACUTE CARE  
GENERAL MEDICINE

**Admit and Initiate Comfort Care Order Set**

Order: ADMIT TO AND INITIATE COMFOF

Admit patient when/date/time? Jul 30, 2010 @ 12:00 ...

What treating specialty/team: |

Start: HOSPICE FOR ACUTE CARE  
GENERAL MEDICINE

ADMIT TO AND INITIATE COMFORT CARE ORDER SET - Approximate Admission date: Jul 30, 2010 @ 12:00

Accept O

Quit

If you are admitting a patient to the VAMC and wish to use the CCOS, you select the “Admit and Initiate” option. The initiation of CCOS is a marker to the staff in the hospital that the patient has special needs. You could conceive of this as a marker such as “Falls Risk” or “Wandering Risk.”

The provider is prompted to select the date and time.

The provider is prompted to select a bed section. You may want to include TS 96 if you have a CLC and Hospice/Palliative Care. Hospice in Acute Care is also an option (1F). In the Birmingham VAMC example we have General Medicine as an option, because we have a mixed unit, with some patients in an Acute Care for the Elderly Track within the General Medicine Bed section.

# Diagnosis

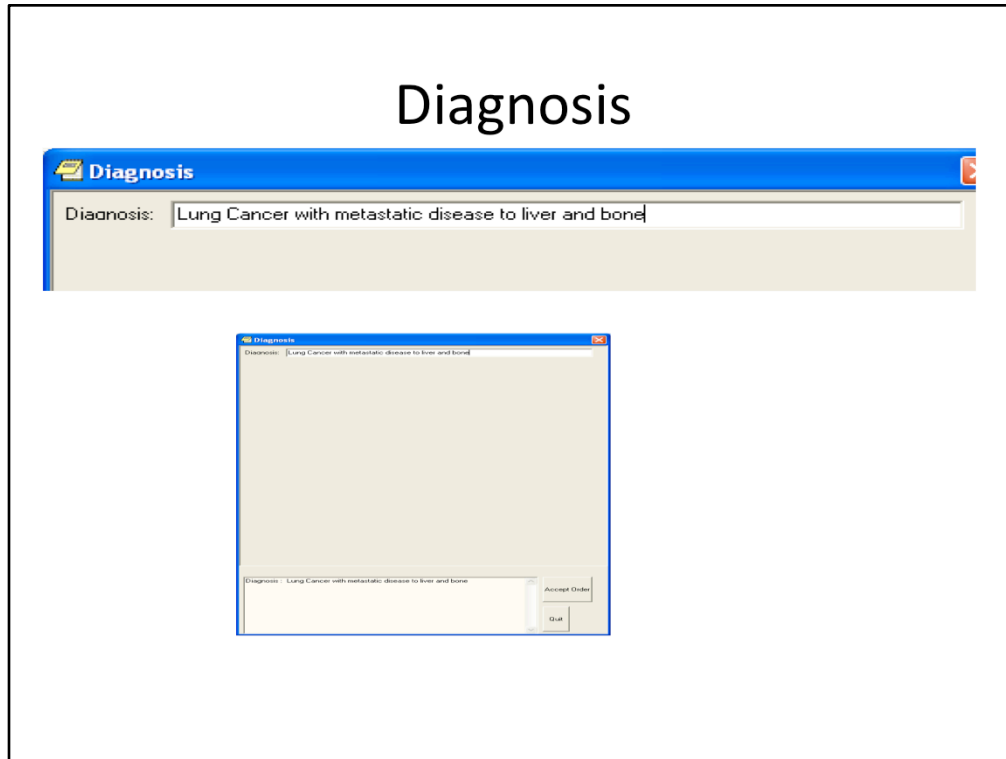

## Diagnosis

There is an administrative requirement to have a diagnosis for the admission. This prompts the provider to fulfill this requirement.



# Condition

**Patient's Condition**

Order:

Enter condition:

Start:

Stop:

**Patient's Condition**

Order:

Enter condition:

Start:

Stop:

CONDITION:

Accept Order

Quit

## Condition

Condition is also an administrative requirement to be declared at admission. This option has a pull down menu and point-and-click option. A facility that is choosing to use the CCOS should populate this with the conditions that the facility uses by policy.

# Transfer Option

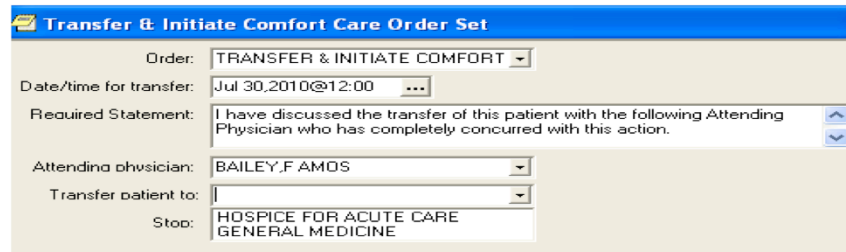

Transfer & Initiate Comfort Care Order Set

Order: TRANSFER & INITIATE COMFORT

Date/time for transfer: Jul 30, 2010 @ 12:00

Required Statement: I have discussed the transfer of this patient with the following Attending Physician who has completely concurred with this action.

Attending physician: BAILEY, F AMOS

Transfer patient to:

Stop: HOSPICE FOR ACUTE CARE GENERAL MEDICINE

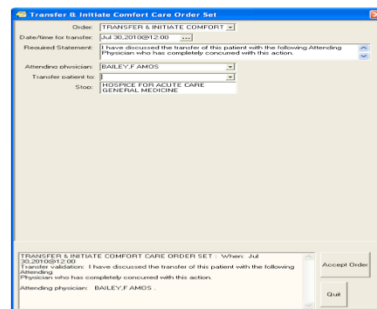

Transfer & Initiate Comfort Care Order Set

Order: TRANSFER & INITIATE COMFORT

Date/time for transfer: Jul 30, 2010 @ 12:00

Required Statement: I have discussed the transfer of this patient with the following Attending Physician who has completely concurred with this action.

Attending physician: BAILEY, F AMOS

Transfer patient to:

Stop: HOSPICE FOR ACUTE CARE GENERAL MEDICINE

TRANSFER & INITIATE COMFORT CARE ORDER SET When: Jul 30, 2010 @ 12:00 Attending Physician: I have discussed the transfer of this patient with the following Attending Physician who has completely concurred with this action. Attending physician: BAILEY, F AMOS

Accept Order

Quit

## Transfer Option

This is used when transferring the patient from one location or service to another after admission. It does require selecting the attending and in this slide gives you an option to select the appropriate bed section .

This option is followed by the “Diagnosis” and “Condition” prompts as noted on the previous example for an admission.

# Designation of Resuscitation Status

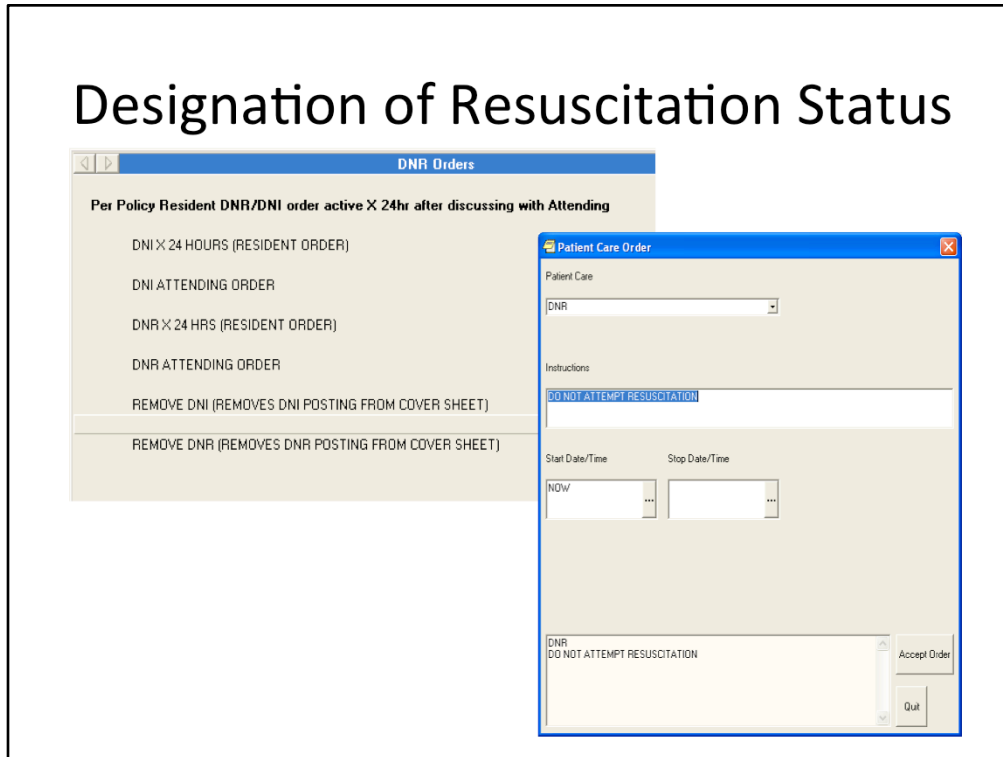

## Designation of Resuscitation Status

It is not mandatory that a patient must have a DNAR order to utilize and benefit from using the Comfort Care Order Set . However, if use of the CCOS is being considered, then a discussion regarding resuscitation status is almost always appropriate. This prompt allows you to more easily document that communication.

## Additional Notes

The Comfort Care Order Set usually uses CPRS orders already in use in your institution. So this section may appear different depending on your hospital policy. This demonstrates using the DNAR (Do Not Attempt Resuscitation), which is the preferred nomenclature in the VHA.

The Office of Ethics is developing a Template Note for Documentation of Preferences for Life Sustaining Therapy that will become a POLST Document and Orders. The timeline for the launch of this plan is not determined. However, this can be substituted here if this process is adopted at your VAMC.

In addition, the position of this item can vary and some centers have chosen to place it at the end of the CCOS. The exact sequence of items can be varied but it is recommended that all items be included.

# Diet Orders

The screenshot shows a software window titled "Comfort Care Diet Orders". The window contains the following text:

**DIET: Patient may improve and desire to taste food.**  
**Order full liquid instead of clear liquid. More palatable.**  
**Easier to swallow. Less likely to cause aspiration. Advance as tolerated.**

Below the bolded text is a list of four items:

- 1 Diet / Nutrition Orders
- 2 Full Liquid Diet
- 3 May have food brought in by family
- 4 Allow patient to sit up for meals. Assist to eat.

## Diet Orders

This slide illustrates the decision support aspect of the Comfort Care Order Set. The bolded black text is an educational note to the providers.

This order section reflects that comfort and pleasure eating is often appropriate. Most patients on home hospice are allowed to eat or drink small amounts as desired. These same patients are often designated as NPO in the hospital, which is frequently not necessary and causes distress to patient and family. The default diet that is recommended is the Full Liquid Diet, because this is usually safer to swallow and is much more palatable with ice cream and other soft foods as an option.

If the provider wishes to order a standard diet, the option is available.

The following orders are recommended: "May have food brought in by family" and "Allow patient to sit up to eat. Assist with meals." Patients are not supposed to eat food other than that provided by the facility, unless there is an order. Families may need prompting and assistance to learn to help the patient sip or eat safely if they desire food.

# Diet Orders

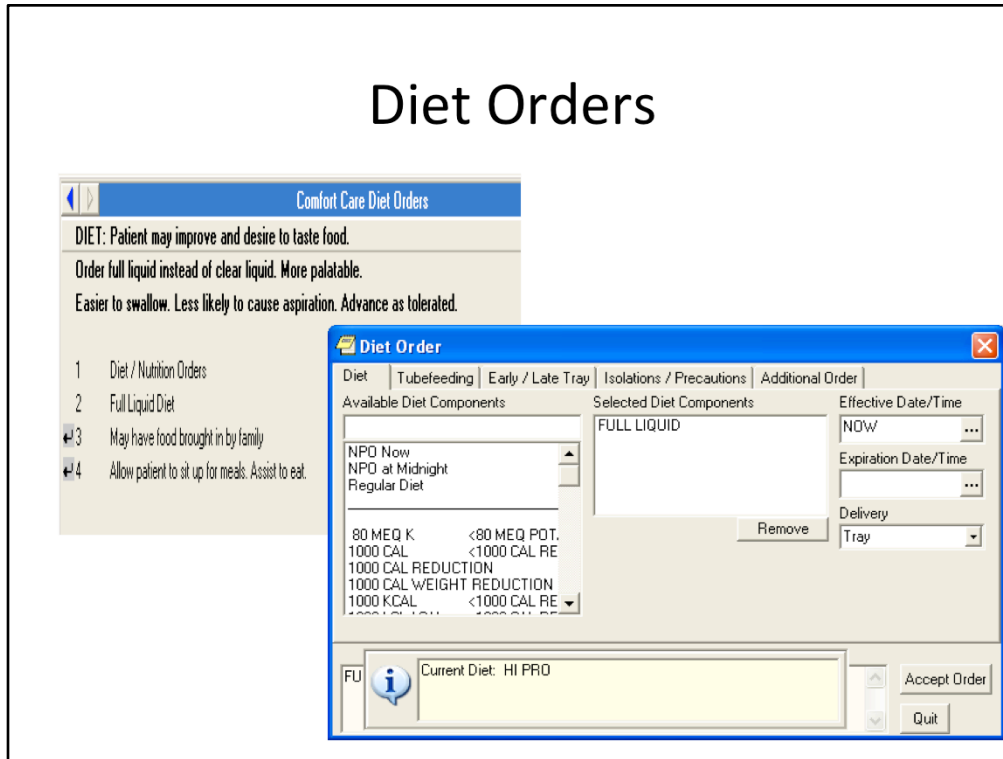

## Diet Orders

This slide illustrates the default option that may be selected by clicking the “Accept Order” button.

# Diet Orders

**Comfort Care Diet Orders**

**DIET: Patient may improve and desire to taste food.**  
**Order full liquid instead of clear liquid. More palatable.**  
**Easier to swallow. Less likely to cause aspiration. Advance as tolerated.**

- 1 Diet / Nutrition Orders
- 2 Full Liquid Diet
- 3 May have food brought in by family
- 4 Allow patient to sit up for meals. Assist to eat.

**Diet / Nutrition Orders**

|    |                                |    |                               |
|----|--------------------------------|----|-------------------------------|
| RG | Order a Regular Diet           | TF | Order a TUBEFEEDING...        |
| 1  | Order 1800 ADA Diet            | 20 | Order Early or Late Food Tray |
| 2  | Order 1800 ADA Diet w/HS Snack |    |                               |
| 3  | Order 2000 ADA Diet            | 30 | NPO Order (specify date/time) |
| 4  | Order CHEMO Diet               | 31 | NPO at MIDNIGHT Tonight       |
| 5  | Order CLEAR LIQUID Diet        | 32 | NPO NOW Order                 |
| 6  | Order DENTAL Diet              | 33 | NPO Except Ice Chips          |
| 7  | Order FULL LIQUID Diet         |    |                               |
| 8  | Order MODIFIED CLEAR LIQ Diet  |    |                               |
| 9  | Order PRUDENT Diet             |    |                               |
| 10 | Order PUREE Diet               |    |                               |
| 11 | Order 2Gm NA Diet              |    |                               |
| 12 | Order 4Gm NA Diet              |    |                               |
|    |                                | 99 | Build your own Diet Order     |

## Diet Orders

This slide illustrates that if the provider needs to order a diet other than the full liquid default diet, they can choose from all the options offered at the specific facility offers.

# Sample Nursing Orders

Comfort Care Nursing Orders

**NURSING:**

**TIPS FOR COMFORT/SAFETY:**  
**Comforting measures. Reposition. Massage. Speak to patient.**  
**Soft music. Avoid sensory overload (TV).**

1 Please weigh on admission to Safe Harbor and weekly on Mondays thereafter  
2 For CHF please weigh daily  
3 May discontinue lab tests and daily wts and SCD's and subq Heparin and discontinue telemetry  
4 RN may change form of medicine and route of administration. No IM meds  
5 Keep hearing aid and dentures and glasses on pt.  
6 Audiology consult: obtain amplifier for HDH patient  
7 If actively dying please turn only for comfort  
8 Please designate the patient HOSPICE FOR ACUTE CARE

**ACTIVITY: AVOID RESTRAINTS. Patient may need one on one sitter.**

**Begin environment modifications:**

9 OOB to chair BID and preferably outside  
10 Open curtain during day.  
11 Decrease unnecessary noise (turn off TV)  
12 Redirect ~ Reposition ~ Speak quietly  
13 Provide nightlight when sleeping.  
14 Please allow family to stay with patient in room

**ASSISTING FAMILY:**  
**Advise family about alerting their family members as to gravity of pt status. Arrange family visits of military relatives by contacting Red Cross and of incarcerated relatives by contacting warden. SW may assist.**

15 Please give family "Preparing For Your Loved One's Loss"

## Nursing Orders

This section allows for a quick selection of orders for patient comfort. In addition, you can use the offered orders and a decision support tool to plan environmental modifications for specific issues, such as care of the actively dying patient or for delirium.

This page is broken up into two parts, so that the content will be easily understood.

# Nursing Care Orders

**Comfort Care Nursing Orders**

**NURSING:**

**TIPS FOR COMFORT/SAFETY:**  
**Comforting measures. Reposition. Massage. Speak to patient.**  
**Soft music. Avoid sensory overload (TV).**

- 1 Please weigh on admission to Safe Harbor and weekly on Mondays thereafter
- 2 For CHF please weigh daily
- 3 May discontinue lab tests and daily wts and SCD's and subq Heparin and discontinue telemetry
- 4 RN may change form of medicine and route of administration. No IM meds
- 5 Keep hearing aid and dentures and glasses on pt.
- 6 Audiology consult: obtain amplifier for HOH patient
- 7 If actively dying please turn only for comfort
- 8 Please designate the patient HOSPICE FOR ACUTE CARE

**ACTIVITY: AVOID RESTRAINTS. Patient may need one on one sitter.**

**Begin environment modifications:**

## Part 1 Tips For Comfort and Safety

This is a list of potential orders to reduce unneeded interventions and for patient comfort. Examples include not using IM injections, changing routes of medications, discontinuing telemetry, SCD's, and subcutaneous heparin, as well orders for turning that are oriented to comfort.

If there is an arrow for this, then the order can go in directly to the order sheet. If not, a dialogue box will appear that may require further information or customization.



# Nursing Care Orders

**ACTIVITY: AVOID RESTRAINTS. Patient may need one on one sitter.**

**Begin environment modifications:**

- ← 9 OOB to chair BID and preferably outside
- ← 10 Open curtain during day.
- ← 11 Decrease unnecessary noise (turn off TV)
- ← 12 Redirect ~ Reposition ~ Speak quietly
- ← 13 Provide nightlight when sleeping.
- ← 14 Please allow family to stay with patient in room

**ASSISTING FAMILY:**

**Advise family about alerting their family members as to gravity of pt status. Arrange family visits of military relatives by contacting Red Cross and of incarcerated relatives by contacting warden. SW may assist.**

- ← 15 Please give family "Preparing For Your Loved One's Loss"

## Part 2

### Tips For Comfort and Safety

#### Avoid Restraints

The following orders (9-14) are all part of the environmental modification for management of delirium and agitation.

“Assisting Family” is decision support to remind providers to assess family needs and the potential need to refer to other members of the IDT, such as Social Work or Pastoral Care, for assistance.

“Preparing for Your Loved One’s Loss” is an educational pamphlet that describes the dying process for family members. It can be given to families and the clinicians can review the content with them to help them cope with sitting in vigil with a patient.

# Vital Signs

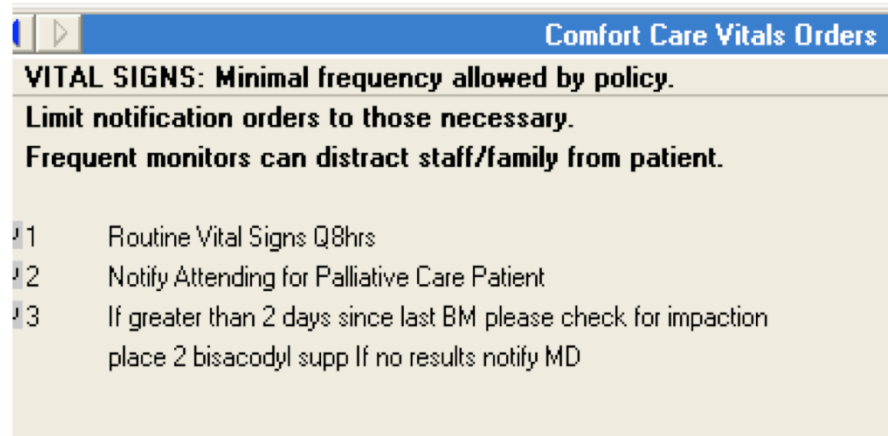

## Vital Signs

Monitoring often increases in intensity at the end of life in hospital settings. This can be uncomfortable for the patient and distracts both family and staff from symptom needs.

Vital signs may be placed at minimum for unit policy, such as once a shift in the Acute Care and once a day in CLC. It may be appropriate to stop doing vital signs particularly in the actively dying patient. However, taking vital signs is a potent symbol of medical care. Patients and families may misunderstand not taking vital signs as not caring or even abandonment. If this issue is discussed and a decision is made to stop doing vital signs, then this could be ordered instead.

See notification on the next page

Also, there is a reminder to assess constipation. Daily review of bowel regimen effectiveness by noting of BM in last 24-48 hours helps reduce painful constipation or obstipation.

# Notifications

The screenshot shows a window titled "Notify MD" with a blue header bar. The main area contains several text input fields for notification details:

- Order: Notify patient's MD or House Officer if
- Respiratory Status: Labored breathing not relieved with medication.
- Agitation: Agitation/Delirium not relieved with medication.
- Pain: Pain not controlled with medication.
- Family Present: Family present and need to speak with physician.
- Start Date: now
- Stop Date: T+21

At the bottom, there is a summary of the notification and two buttons: "Accept Order" and "Quit".

The notifications in this section are based on patient symptom burden, as opposed to a set of vital sign reports.

## Examples

Pain not controlled with medications

Labored breathing not controlled with medications

Delirium/Agitation not relieved with medication

Family present and need to speak with clinician

These notifications reflect the comfort care order plan and the need to modify the treatment if it is not effective.

In the next sections, treatments for each of the symptom clusters are presented to the clinician.

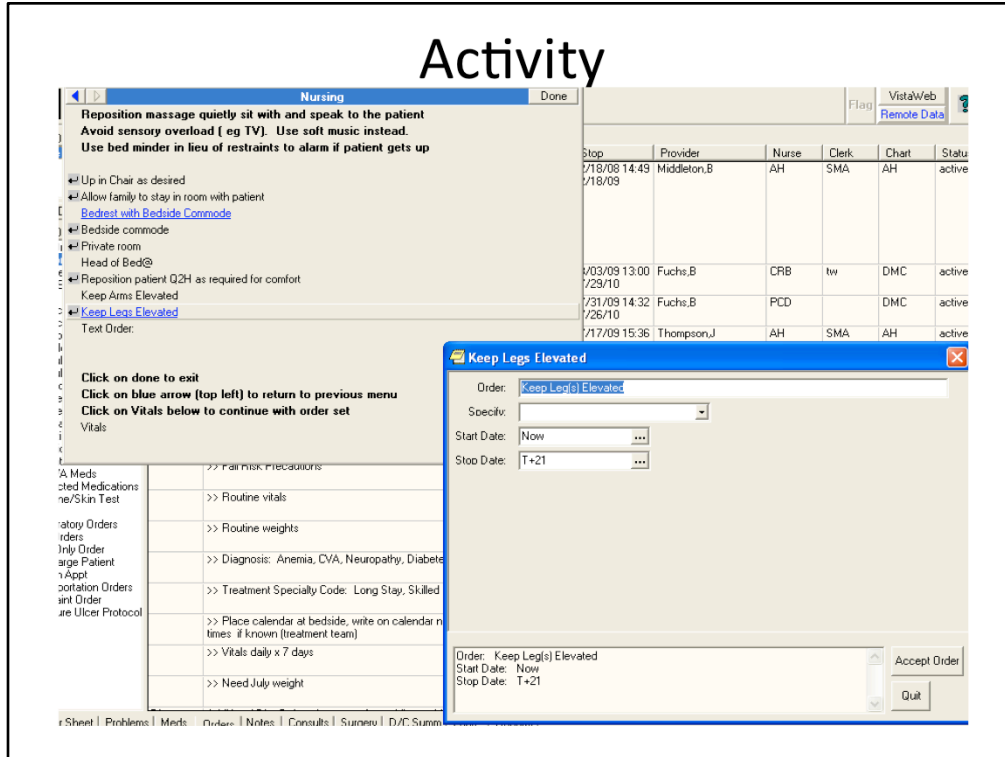

## Activity

This is an example of another option for an activity page that could prompt clinicians to consider orders that allow patients to get into a position that is comfortable and least restrictive. Patients at end of life have often have restrictive orders, such as strict bed rest, that are not consistent with goals of care and usually are not necessary or even helpful for patients.

# IV Considerations

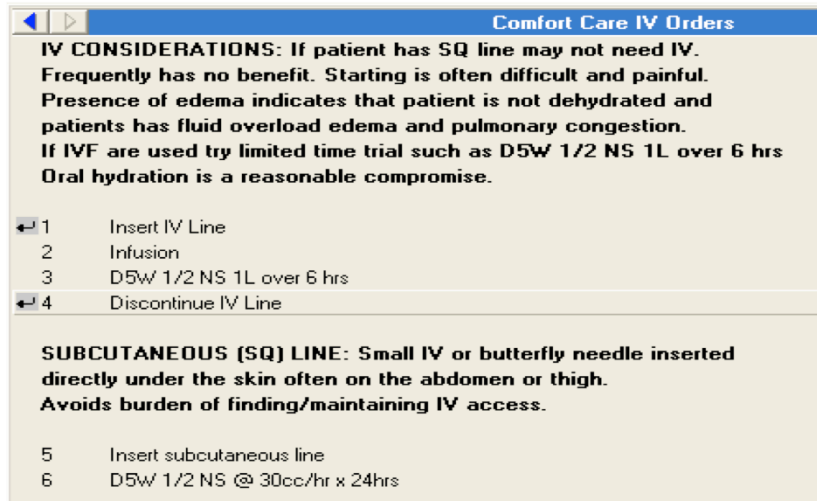

**Comfort Care IV Orders**

**IV CONSIDERATIONS:** If patient has SQ line may not need IV.  
Frequently has no benefit. Starting is often difficult and painful.  
Presence of edema indicates that patient is not dehydrated and patients has fluid overload edema and pulmonary congestion.  
If IVF are used try limited time trial such as D5W 1/2 NS 1L over 6 hrs  
Oral hydration is a reasonable compromise.

- 1 Insert IV Line
- 2 Infusion
- 3 D5W 1/2 NS 1L over 6 hrs
- 4 Discontinue IV Line

**SUBCUTANEOUS (SQ) LINE:** Small IV or butterfly needle inserted directly under the skin often on the abdomen or thigh.  
Avoids burden of finding/maintaining IV access.

- 5 Insert subcutaneous line
- 6 D5W 1/2 NS @ 30cc/hr x 24hrs

Patients on home hospice programs do not commonly receive intravenous (IV) fluids. However, in the hospital, IV fluids are a potent symbol of care and represent that providers are “doing something.” IV fluids at end of life in the hospital can be beneficial. For some patients, hydration with IV fluids may be helpful to manage a reversible delirium or bridge declined oral intake until a time of recovery. In addition, there are some medications, such as antibiotics, or other treatments, such as blood transfusion, that may be helpful in palliation of specific symptoms.

However, IV lines can also be burdensome for patients at end of life. IV access is often difficult to maintain, which leads to patient discomfort when multiple attempts are made to start an IV. There is also significant risk of line-associated infection. In many patients, IV fluids contribute to edema and fluid overload, which is distressing in itself. In addition, patients on maintenance IV fluids are tethered by this line and may be restrained to protect the line.

Most medications for comfort can be given through a subcutaneous (SQ) line, which is easy to place and maintain, is not painful, and has low risk of infection. Medications that can be administered subcutaneously include opioids, lorazepam, haloperidol, and dexamethasone. The medications are often given intermittently, but the subcutaneous line can also be used for continuous infusion of opioids.

# IV Fluids

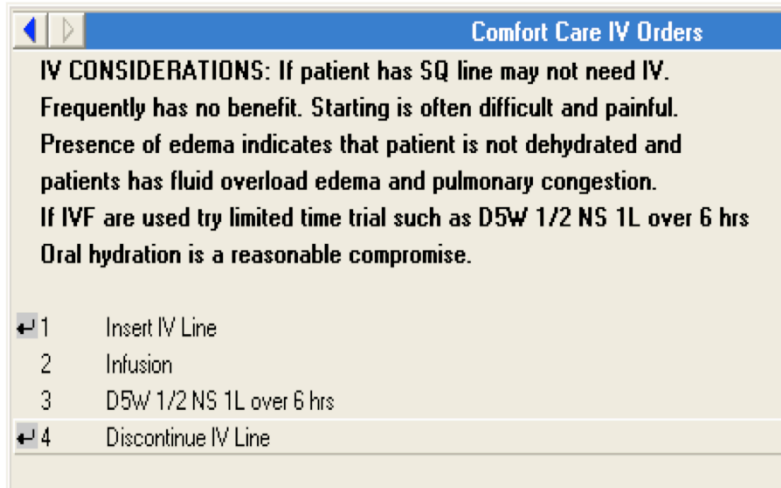

**Comfort Care IV Orders**

**IV CONSIDERATIONS:** If patient has SQ line may not need IV.  
Frequently has no benefit. Starting is often difficult and painful.  
Presence of edema indicates that patient is not dehydrated and patients has fluid overload edema and pulmonary congestion.  
If IVF are used try limited time trial such as D5W 1/2 NS 1L over 6 hrs  
Oral hydration is a reasonable compromise.

- 1 Insert IV Line
- 2 Infusion
- 3 D5W 1/2 NS 1L over 6 hrs
- 4 Discontinue IV Line

See details of the IV decision support education.

## Options

Insert IV if IVF or IV medications would be an appropriate palliative treatment.

Default IVF is one 1000ML of D5 1/2 NS over 6 hours. This illustrates the idea of ordering fluids as needed and also of using intermittent fluids. This could be customized, however most patients could tolerate this rate for 6 hours if they truly needed fluids. The patient is then liberated from the IV line, so that it does not interfere with comfort or position, and avoids struggling to prevent the line from being dislodged.

If a different fluid is preferred, one can choose “Infusion” to go to CPRS chooses.

Consider a “Remove IV” order. Frequently, the patient has an IV and it may not be needed. It should be removed, because there is a risk of infection. Also, in many facilities, IVs are automatically replaced on a 3-day interval, which is a burdensome procedure for patients.

## Subcutaneous Line

**SUBCUTANEOUS (SQ) LINE: Small IV or butterfly needle inserted directly under the skin often on the abdomen or thigh. Avoids burden of finding/maintaining IV access.**

- 5     Insert subcutaneous line
- 6     D5W 1/2 NS @ 30cc/hr x 24hrs

### Subcutaneous Line

This section provides decision support to use subcutaneous line and therapy.

Frequently the subcutaneous line is placed and is used for intermittent injection of opioids or other comfort medications. There are significant pharmacological advantages to SQ opioids, because the duration of the opioid effect is longer.

The subcutaneous line could also be used for continuous infusion via a PCA pump. These pumps are usually for morphine or hydromorphone infusion, but could be used in select patients for benzodiazepines.

In some cases, it may be appropriate to place more than one SQ line, when a continuous infusion is needed for one medication and a second line is needed for an intermittently administered medication.

Hyperdermoclysis is the infusion of fluid with a SQ line. See next page for more details.

# Hyperdermoclysis

The screenshot shows a software window titled "Infusion Order" with a blue header and a close button. The window is divided into several sections:

- Solutions/Additives:** A list of solutions is shown on the left, including 0.225% NaCl, 0.45% NaCl/5% Dextrose, 0.9% NaCl, and 10% Dextrose. The selected solution is "DEXTROSE 5%/SODIUM CHLORIDE 0.45% INJ.SOLN".
- Volume/Strength:** The volume is set to "500" and the strength is "ML".
- Comments:** A text area contains the comment: "Infuse 30cc/hr x 24 hrs (continuous), SQ line fluid trial order for palliative care patient".
- Route/Type/Schedule:** The route is "SUBCUTANEOUS", the type is "Continuous", and the schedule is blank.
- Infusion Rate:** The rate is set to "50" ml/hr.
- Priority/Duration:** The priority is "ROUTINE" and the duration is "720" ml.
- Buttons:** "Accept Order" and "Quit" buttons are at the bottom right.

## Hyperdermoclysis

Hyperdermoclysis is the infusion of parental fluids into the subcutaneous tissue. This process can take longer to get the fluids in, but can be effective and is often a much less invasive procedure than placing a central line or IV .

The default is for a lower 30cc or 50cc per hour infusion. As mentioned earlier, IV fluids are a potent symbol of care and caring. Some families, even after discussion and teaching, may feel uncomfortable with stopping IV fluids in patients who are clearly not benefiting or even in patients who may be having distress related to the ongoing fluids. In these rare cases, low flow rate hyperdermoclysis may meet the family's need for symbolic care and reduce the burden of the therapy on the patient.

However, hyperdermoclysis can be an effective rehydration strategy. The SQ line for hyperdermoclysis should be placed on the abdominal wall to give more space for fluid diffusion. If two lines are placed, one on each side of the abdomen, and a flow rate of 50ml each is used, a liter could be infused in 10 hours and up to 2 1/2 liters could be infused in a 24-hour period, which could significantly rehydrate a patient that might benefit from this.

This appendix also includes an example of policy and procedures for subcutaneous line placement and for subcutaneous medicine administration and hyperdermoclysis.



# Respiratory Therapy

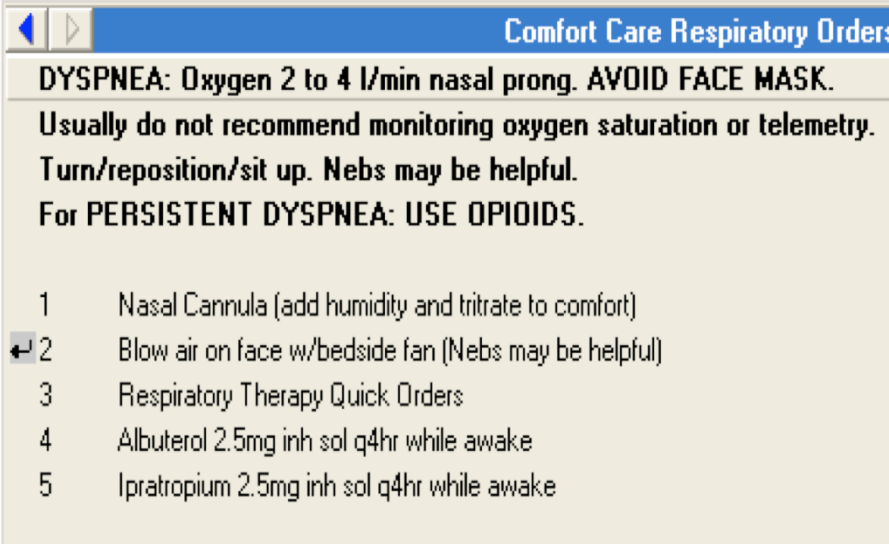

**Comfort Care Respiratory Orders**

**DYSPNEA: Oxygen 2 to 4 l/min nasal prong. AVOID FACE MASK.**

**Usually do not recommend monitoring oxygen saturation or telemetry.**

**Turn/reposition/sit up. Nebes may be helpful.**

**For PERSISTENT DYSPNEA: USE OPIOIDS.**

- 1 Nasal Cannula (add humidity and tritrate to comfort)
- 2 Blow air on face w/bedside fan (Nebes may be helpful)
- 3 Respiratory Therapy Quick Orders
- 4 Albuterol 2.5mg inh sol q4hr while awake
- 5 Ipratropium 2.5mg inh sol q4hr while awake

## Respiratory Therapy

Oxygen may be an effective treatment for hypoxia and dyspnea. However, oxygen is also a potent symbol of medical care. In home hospice settings, oxygen via nasal prong and A/A nebulizer are commonly provided and seem to help relieve symptoms. Many patients wear the oxygen for part of the time, but also use environmental modifications, such as a fan or air conditioner to blow air on the face, sitting up and leaning forward, or pursed lip breathing, which are all techniques to allow for better expansion of lung, takes advantage of auto-peep and leads to reduction of dead space.

Patients in the hospital who have severe dyspnea/hypoxia may have much more invasive procedures, such as face mask, BiPAP, CPAP, or ultimately mechanical ventilation. This is often very appropriate, if aligned with patient goals of care and as a trial of treatment to bridge to time of recovery. However, for many patients at end of life in the hospital setting, these treatments are burdensome and not effective in relieving symptoms. On the other hand, the environmental modifications described above are often not utilized or not available and/or patients are prevented from modifying their personal environment for their comfort.

# Oxygen Nasal Cannula

The screenshot shows a software window titled "Oxygen Nasal Cannula at". Inside the window, there is a dropdown menu for "Orderable Item" set to "OXYGEN NASAL CANNULA". Below it is a text field for "Specify flow rate (L/min):" containing "2 L/m". There are two more fields: "Start:" with "NOW" and "Stop:" with "t+30". At the bottom of the window, a summary line reads "OXYGEN NASAL CANNULA at flow rate of 2 L/m , add humidity and titrate to comfort". To the right of this summary are two buttons: "Accept Order" and "Quit".

Oxygen therapy is a potent symbol of medical treatment.

In addition, oxygen therapy may reduce dyspnea by correcting hypoxia. However, in many patients at end of life correction of hypoxia is not necessarily feasible and is not closely correlated with dyspnea. This means that many patients who have dyspnea may not be hypoxic. Others have dyspnea even if hypoxia has been corrected. Oxygen therapy by nasal cannula may have a placebo effect. Also, there is some evidence indicating that air moving over the airways may relieve dyspnea as effectively as oxygen in some patients.

Many patients at end of life do not tolerate an oxygen mask, as it makes them feel smothered, even if it does reduce the hypoxia. If the mask or more intrusive oxygen therapy such as BiPAP or CPAP is a bridge to a time of recovery then a trial of treatment may be indicated.

The default order here is for Oxygen 2 l/m Nasal Cannula and to titrate to comfort. This is in line with how oxygen supplementation is used in home hospice and most patients at end of life find it most useful.

This is coupled with the order to have a fan at the bedside to blow air on the patient for comfort.

# Albuterol Nebulization

The screenshot shows a 'Medication Order' window with the following details:

- Medication: ALBUTEROL 0.5% SOLN FOR INHAL UD SOLN.INHL
- Change button
- Table with columns: Dosage, Complex, Route, Schedule (Day-Of-Week), and PRN.
- Table content:

| Dosage     | Complex | Route      | Schedule (Day-Of-Week) | PRN                                 |
|------------|---------|------------|------------------------|-------------------------------------|
| 2.5MG 0.5% |         | INHALATION | Q4HR                   | <input type="checkbox"/>            |
| 2.5MG 0.5% |         | INHALATION | Q1HR                   | <input type="checkbox"/>            |
|            |         |            | Q24HR                  | <input type="checkbox"/>            |
|            |         |            | Q2HR                   | <input type="checkbox"/>            |
|            |         |            | Q-2WEEKS               | <input type="checkbox"/>            |
|            |         |            | Q30 MINS               | <input type="checkbox"/>            |
|            |         |            | Q3D                    | <input type="checkbox"/>            |
|            |         |            | Q3HR                   | <input type="checkbox"/>            |
|            |         |            | Q-3WEEKS               | <input type="checkbox"/>            |
|            |         |            | Q48HR                  | <input type="checkbox"/>            |
|            |         |            | Q4HR                   | <input checked="" type="checkbox"/> |
|            |         |            | Q-4WEEKS               | <input type="checkbox"/>            |
|            |         |            | Q5MIN                  | <input type="checkbox"/>            |
|            |         |            | Q6HR                   | <input type="checkbox"/>            |
|            |         |            | Q72HR                  | <input type="checkbox"/>            |
|            |         |            | Q8HR                   | <input type="checkbox"/>            |
|            |         |            | Q96H                   | <input type="checkbox"/>            |
- Comments: WHILE AWAKE
- Give additional dose now:
- Admin Time: 0200-0600-1000-1400-1800-2200
- Priority: ROUTINE
- Expected First Dose: TODAY (Aug 07, 10) at 14:00
- Dispensing: DISP PER EACH (30/BOX)
- Summary: ALBUTEROL 0.5% SOLN FOR INHAL UD SOLN.INHL 0.5% 2.5MG INHL Q4HR WHILE AWAKE
- Buttons: Accept Order, Quit

Albuterol and ipratropium nebulization are commonly provided to patients with respiratory distress. Many patients have some component of reactive airway disease, even if it is not the primary cause of their illness. Many patients also report subjective benefit from A/A nebulization, particularly if they are too weak to be able to effectively use the Metered Dose Inhaler. Therefore, the order set allows the provider to quickly order these treatments. Either one or the other or both may be ordered. Some patients may experience anxiety associated with the albuterol treatment.

The orders are set at a default of Q4 hours, but note that WHILE AWAKE so that if a patient is comfortable the nebulization could be skipped. Modifications can be made, such as ordering QID, so that sleep is not disrupted or the clinician could use the order twice to set up a QID routine and the second time to provide for a PRN option.

See the next slide for the ipratropium order.

# Ipratropium Nebulization

**Medication Order**

IPRATROPIUM BR 0.02% INH SOLN UD SOLN,INHL Change

| Dosage                                     | Complex | Route      | Schedule (Day-Of-Week) | PRN                      |
|--------------------------------------------|---------|------------|------------------------|--------------------------|
| IPRATROPIUM BR 0.02% INH SOLN UD SOLN,INHL |         | INHALATION | Q4HR                   | <input type="checkbox"/> |
|                                            |         | INHALATION | Q48HR                  |                          |
|                                            |         |            | Q4HR                   |                          |
|                                            |         |            | Q-4WEEKS               |                          |
|                                            |         |            | Q5MIN                  |                          |
|                                            |         |            | Q6HR                   |                          |
|                                            |         |            | Q72HR                  |                          |
|                                            |         |            | Q8HR                   |                          |
|                                            |         |            | Q96H                   |                          |
|                                            |         |            | QAM                    |                          |
|                                            |         |            | QAM (ANTI-DIABETIC)    |                          |
|                                            |         |            | QAM&QPM                |                          |
|                                            |         |            | QHS                    |                          |
|                                            |         |            | QHS PRN                |                          |
|                                            |         |            | QID                    |                          |
|                                            |         |            | QID SS                 |                          |
|                                            |         |            | QNOON                  |                          |
|                                            |         |            | QPM                    |                          |
|                                            |         |            | QPM (ANTI-DIABETIC)    |                          |
|                                            |         |            | QPM (EVENING-MEAL)     |                          |
|                                            |         |            | SA                     |                          |
|                                            |         |            | STAT                   |                          |

Comments: IN 3ML NS. WHILE AWAKE

Give additional dose now

Admin. Time: 0200-0600-1000-1400-1800-2200

Priority: ROUTINE

Expected First Dose: TODAY (Aug 07, 10) at 14:00

IPRATROPIUM BR 0.02% INH SOLN UD SOLN,INHL  
IPRATROPIUM BR 0.02% INH SOLN UD SOLN,INHL INHL Q4HR IN 3ML NS. WHILE AWAKE

Accept Order Quit

See discussion of this option on the previous slide.

# Respiratory Therapy Menu

| Respiratory Therapy Quick Orders |                                                                       |
|----------------------------------|-----------------------------------------------------------------------|
| 1                                | Oxygen Mask @ (FIO2)                                                  |
| 2                                | Oxygen Nasal Cannula @ (Rate)                                         |
| 3                                | Ventilator & (Mode)                                                   |
| 4                                | Incentive Spirometry                                                  |
| 5                                | Pulse Oximetry (@ Rate)                                               |
| 6                                | Suction                                                               |
| 7                                | Turn/Cough/Deep Breathe (TCDB)                                        |
| 8                                | Sputum Induction                                                      |
| 9                                | Trach/Laryngectomy Care                                               |
| 10                               | Chest Percussion/Postural Drainage (CPPD)                             |
| 11                               | Vibro-percussion                                                      |
| 12                               | Request fan for pt bedside (Nebis maybe helpful)                      |
| 20                               | Home O2 Evaluation                                                    |
| <b>RESP THERAPY MEDS:</b>        |                                                                       |
| 30                               | Racemic Epinephrine/NS NOW                                            |
| 31                               | Racemic Epinephrine/NS Q30min X3                                      |
| 32                               | Atrovent 0.5mg/NS Q2hr NEB                                            |
| 33                               | Atrovent 0.5mg/NS Q4hr NEB                                            |
| 34                               | Atrovent 0.5mg/NS QID NEB                                             |
| 35                               | Albuterol 2.5mg/NS NEB Now                                            |
| 36                               | Albuterol 2.5mg/NS Q2hr NEB                                           |
| 37                               | Albuterol 2.5mg/NS Q4hr NEB                                           |
| 38                               | Albuterol 2.5mg/NS QID NEB                                            |
| 39                               | Ventilator Bronchodilator Protocol                                    |
| 99                               | Other Respiratory Therapy Orders<br>(Free Text - not for medications) |

This is standard menu for respiratory therapy. Patients referred to hospice and palliative care programs may benefit from one or more of the additional options. For example, a significant number of patients have a change in goals of care after a prolonged period of Mechanical Ventilation that has led to the placement of a tracheotomy. In that case, tracheotomy care options are helpful in managing the care of a specific patient safely and comfortably.

# Opioid for Pain and Dyspnea

| Comfort Care Opioid Orders                                                  |                                       |
|-----------------------------------------------------------------------------|---------------------------------------|
| <b>PAIN AND DYSPNEA (OPIOIDS): Opioids usually most effective.</b>          |                                       |
| <b>Calculate morphine equivalents used in recent past adjust as needed.</b> |                                       |
| <b>SL q2hr offer patient may refuse.</b>                                    |                                       |
| <b>PO meds offer longer duration of action then IV/subQ.</b>                |                                       |
| <b>Morphine PO to IV equivalent is 3:1.</b>                                 |                                       |
| 1                                                                           | Morphine 5mg SL Q2hr                  |
| 2                                                                           | Morphine 5mg PO Q2hr                  |
| 3                                                                           | Morphine 2mg SQ Q2hr                  |
| 4                                                                           | Morphine 1mg IV PCA Pump per Protocol |
| 5                                                                           | Morphine 500mg/NS 50ml SQ Infusion    |
| 6                                                                           | Oxycodone                             |
| <b>CONSTIPATION: Initiate if on opioids or no BM x 2 days.</b>              |                                       |
| 7                                                                           | Please check for impaction            |
| 8                                                                           | Bisacodyl 5mg PO BID                  |
| 9                                                                           | Sennosides 17.2mg PO BID (may crush)  |
| 10                                                                          | Docusate 250mg PO BID                 |
| 11                                                                          | MDM 30ml PO DAILY PRN constipation    |
| 12                                                                          | Lactulose 30gm/45ml DAILY             |
| 13                                                                          | Bisacodyl SUPP 10MG PR DAILY PRN      |
| 14                                                                          | FLets enema PR DAILY PRN              |

## Pain and Dyspnea

This section is critical because pain and dyspnea are such common symptoms at the end of life. All patients should have orders for some medications in this section to ensure they have access to opioids for pain and dyspnea..

## Discussion of Opioid Options

| Comfort Care Opioid Orders                                                  |                                       |
|-----------------------------------------------------------------------------|---------------------------------------|
| <b>PAIN AND DYSPNEA (OPIOIDS): Opioids usually most effective.</b>          |                                       |
| <b>Calculate morphine equivalents used in recent past adjust as needed.</b> |                                       |
| <b>SL q2hr offer patient may refuse.</b>                                    |                                       |
| <b>PO meds offer longer duration of action then IV/subQ.</b>                |                                       |
| <b>Morphine PO to IV equivalent is 3:1.</b>                                 |                                       |
| 1                                                                           | Morphine 5mg SL Q2hr                  |
| 2                                                                           | Morphine 5mg PO Q2hr                  |
| 3                                                                           | Morphine 2mg SQ Q2hr                  |
| 4                                                                           | Morphine 1mg IV PCA Pump per Protocol |
| 5                                                                           | Morphine 500mg/NS 50ml SQ Infusion    |
| 6                                                                           | Oxycodone                             |

### Pain and Dyspnea

The bolded section is decision support information to guide the clinician in choosing treatment options from the list below. A common barrier to adequate opioids therapy at end of life is loss of the ability to swallow pills or tablet, thus requiring a sublingual or parental route. A second problem is that patients are weak and not able to request PRN medication. In this situation, it can help to have orders indicating scheduled "offer may refuse" or "based on symptoms" administration.

The default doses for morphine sulfate are set at 5mg PO/SL or 2mg SQ, which would be equal in potency to a "Lortab 5" or "Percocet." Morphine is set as the default because it can be administered PO/SL/SQ or IV; it is an effective analgesic and is the best documented opioid for treatment of dyspnea.

A clinician could choose to use a higher dose if the patient has been on opioids and has developed tolerance, however, our research revealed that >80% of patients had received no opioids in the last 72 hours of life, such that they were, for practical purposes, opioid naïve. These orders should be seen as dose finding for the next 12-24 hours and provide guidance on choosing an effective dosing regimen for patients who do not have adequate control with the default setting.

If a patient has an established and effective opioid regimen, such as fentanyl patches or hydromorphone, and will be able to continue the regimen, this would be an appropriate choice.

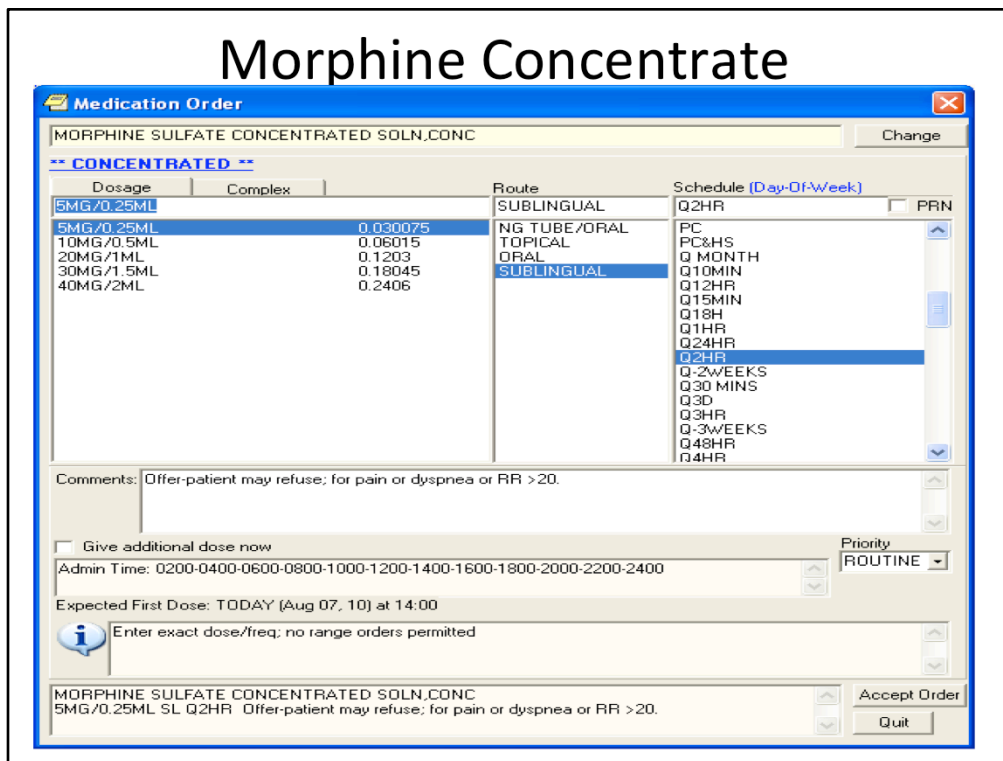

General review of opioid orders:

The default is set to lower doses, such as in this case, morphine 5mg SL. The provider does have the option to choose a higher dose.

These medications are scheduled q 2 hours. This schedule may seem frequent, but it is intended to be an initial dose finding to achieve pain relief in a 4-8 hour period. If a patient is not achieving pain control with this dose finding, the clinician can use the amount administered to choose a higher dose for breakthrough or start a continuous infusion.

These medications are not ordered PRN. PRN medications are not effective at end of life, when patients have difficulty requesting medications. The nursing staff will assess if the pain medication is needed every 2 hours. If the patient can respond at all, the staff member could offer medication and the patient can decline. For non-verbal patients, the staff should use the non-verbal pain assessment and clinical judgment. If the patient has a respiratory rate of greater than 20/minute, this could indicate dyspnea that might benefit from opioids.

This approach is actually easier for nursing staff to document than PRN opioids. When a PRN medication is administered, a follow-up assessment of effectiveness is required. With this method, the nurse only has to document if the medication was given and does not have to document twice.



# Morphine Concentrate

**Medication Order**

MORPHINE SULFATE CONCENTRATED SOLN.CONC Change

**\*\* CONCENTRATED \*\***

| Dosage     | Complex  | Route        | Schedule (Day-Of-Week)            |
|------------|----------|--------------|-----------------------------------|
| 5MG/0.25ML |          | SUBLINGUAL   | Q2HR <input type="checkbox"/> PRN |
| 5MG/0.25ML | 0.030075 | NG TUBE/ORAL | PC                                |
| 10MG/0.5ML | 0.06015  | TOPICAL      | PC&HS                             |
| 20MG/1ML   | 0.1203   | ORAL         | Q MONTH                           |
| 30MG/1.5ML | 0.18045  | SUBLINGUAL   | Q 10MIN                           |
| 40MG/2ML   | 0.2406   |              | Q 12HR                            |
|            |          |              | Q 15MIN                           |
|            |          |              | Q 18H                             |
|            |          |              | Q 1HR                             |
|            |          |              | Q 24HR                            |
|            |          |              | <b>Q 2HR</b>                      |
|            |          |              | Q-2WEEKS                          |
|            |          |              | Q 30 MINS                         |
|            |          |              | Q 3D                              |
|            |          |              | Q 3HR                             |
|            |          |              | Q-3WEEKS                          |
|            |          |              | Q 48HR                            |
|            |          |              | Q 4HR                             |

Comments: Offer-patient may refuse; for pain or dyspnea or RR >20.

Give additional dose now

Admin Time: 0200-0400-0600-0800-1000-1200-1400-1600-1800-2000-2200-2400

Expected First Dose: TODAY (Aug 07, 10) at 14:00

Enter exact dose/freq; no range orders permitted

MORPHINE SULFATE CONCENTRATED SOLN.CONC  
5MG/0.25ML SL Q2HR Offer-patient may refuse; for pain or dyspnea or RR >20.

Accept Order  
Quit

## Morphine Concentrate

Morphine concentrate is 20mg/ml and can be administered sublingually. This formulation and route for morphine are commonly used in the home hospice setting. Even patients who are not alert or able to swallow can be effectively treated for pain or dyspnea with this medication.

Although morphine SL has been used in home hospice, there have been some barriers to use in the inpatient setting. In general, there seems to be a preference for IV/SQ parental medications among physicians, nurses, patients, and families, as this is perceived as more “effective” and also, more inline with the culture of using injections or parental medications. We have observed that the SQ option is commonly used in many of the hospitals where this CCOS has been implemented.

Another barrier is pharmacy policy that regulates dispensing of medication. It is not possible to use the bottle and dropper that is used at home and meet standards for control of the dispensing of the morphine SL. Some pharmacies have drawn the morphine concentrate up in insulin syringes, so that there is a unit dose. Others have purchased unit doses that come in 1 ml ampules with 20mg of morphine, which often leads to wasting medication each time the ampules are opened.

# Morphine Solution

**Medication Order**

MORPHINE SULFATE SOLN,ORAL Change

| Dosage     | Complex | Route        | Schedule (Day-Of-Week) | PRN                      |
|------------|---------|--------------|------------------------|--------------------------|
| 5MG        |         | ORAL         | Q2HR                   | <input type="checkbox"/> |
| 5MG/2.5ML  | 0.1965  | ORAL         | PC                     |                          |
| 10MG/5ML   | 0.393   | ORAL         | PC&HS                  |                          |
| 15MG/7.5ML | 0.5895  | NG TUBE/DRAL | Q MONTH                |                          |
| 20MG/10ML  | 0.786   |              | Q10MIN                 |                          |
| 30MG/15ML  | 1.179   |              | Q12HR                  |                          |
|            |         |              | Q15MIN                 |                          |
|            |         |              | Q18H                   |                          |
|            |         |              | Q1HR                   |                          |
|            |         |              | Q24HR                  |                          |
|            |         |              | Q2HR                   |                          |
|            |         |              | Q-2WEEKS               |                          |
|            |         |              | Q30 MINS               |                          |
|            |         |              | Q3D                    |                          |
|            |         |              | Q3HR                   |                          |
|            |         |              | Q-3WEEKS               |                          |
|            |         |              | Q48HR                  |                          |
|            |         |              | Q4HR                   |                          |
|            |         |              | Q-4WEEKS               |                          |
|            |         |              | Q5MIN                  |                          |
|            |         |              | Q6HR                   |                          |
|            |         |              | Q72HR                  |                          |

Comments: Offer-patient may refuse; for pain or dyspnea or RR >20.

Give additional dose now

Admin Time: 0200-0400-0600-0800-1000-1200-1400-1600-1800-2000-2200-2400

Expected First Dose: TODAY (Aug 07, 10) at 14:00

MORPHINE SULFATE SOLN,ORAL  
5MG PO Q2HR Offer-patient may refuse; for pain or dyspnea or RR >20.

Priority: ROUTINE

Accept Order  
Quit

## Morphine Solution

Morphine solution is a 10mg/5ml concentration that may make administration easier in some patients. If a patient has a PEG tube present (patients with history of cancers of the oro-pharynx often have had a PEG tube placed during active treatment) it is often easier to administer this solution which has more volume and then flush the feeding tube than to try to administer the more concentrated form.

The orders regarding dose, timing, and scheduling are the same as described for all opioids in the dose finding and titration phase.

# Morphine Subcutaneous Injection

**Medication Order**

MORPHINE SULFATE INJ Change

| Dosage / Rate | Complex | Route         | Schedule (Day-Of-Week) | PRN                      |
|---------------|---------|---------------|------------------------|--------------------------|
| 2MG/1ML       |         | SUBCUTANEOUS  | Q2HR                   | <input type="checkbox"/> |
| 2MG/1ML       | 0.726   | IV PUSH       | PC                     | <input type="checkbox"/> |
| 4MG/1ML       | 0.692   | INTRAMUSCULAR | PC&HS                  | <input type="checkbox"/> |
| 8MG/1ML       | 1.345   | INTRAVENOUS   | Q MONTH                | <input type="checkbox"/> |
| 10MG/1ML      | 0.775   | NAS&L         | Q10MIN                 | <input type="checkbox"/> |
| 15MG/1ML      | 0.135   | SUBCUTANEOUS  | Q12HR                  | <input type="checkbox"/> |
| 15MG/1ML      | 0.1095  |               | Q15MIN                 | <input type="checkbox"/> |
| 20MG/2ML      | 1.55    |               | Q18H                   | <input type="checkbox"/> |
| 30MG/2ML      | 0.219   |               | Q1HR                   | <input type="checkbox"/> |
|               |         |               | Q24HR                  | <input type="checkbox"/> |
|               |         |               | Q2WEEKS                | <input type="checkbox"/> |
|               |         |               | Q30 MINS               | <input type="checkbox"/> |
|               |         |               | Q3D                    | <input type="checkbox"/> |
|               |         |               | Q3HR                   | <input type="checkbox"/> |
|               |         |               | Q-3WEEKS               | <input type="checkbox"/> |
|               |         |               | Q48HR                  | <input type="checkbox"/> |

Comments: Offer-patient may refuse; for pain or dyspnea or RR >20.

Give additional dose now

Admin Time: 0200-0400-0600-0800-1000-1200-1400-1600-1800-2000-2200-2400 Priority: ROUTINE

Expected First Dose: TODAY (Aug 07, 10) at 14:00

Outpatient Rx for this must be written on Rx Blank & signed by MD

MORPHINE SULFATE INJ  
2MG/1ML SC Q2HR Offer-patient may refuse; for pain or dyspnea or RR >20.

Morphine Sulfate 2mg SQ q 2hour schedule, offer patient may refuse or Respiratory Rate >20/minute. This order has been the most commonly used opioid order in the dose finding and titration process in facilities that have adopted the CCOS. MS 2mg SQ is comparable to the MS 5mg SL/PO dose in potency using the 3:1 ratio of potency for oral to parenteral morphine.

It should be noted that morphine IV is not recommended routinely in the CCOS. Problems encountered with morphine IV include the following:

- a) The short half life (less than 10 minutes) means that the effect wanes quickly when given intermittently, with reoccurrence of pain well before the next dosing interval. If morphine is to be used IV, it is best administered as Patient Controlled Analgesia (PCA) with or without a basal rate. However, many patients at end-of-life are not alert enough to use the PCA function, and almost all will lose capacity to use the PCA function before death.
- b) Loss of the IV line is a common occurrence, which results in interruption and delay of administration of opioids when symptoms are often most problematic.
- c) Maintaining and restarting IV lines causes pain and distress of in patients.

For these reasons SQ administration is recommend since the half life is longer, providing better analgesic control, and the SQ line can be easily inserted and replaced if need be, reducing the interruption and delay in administration of opioids.

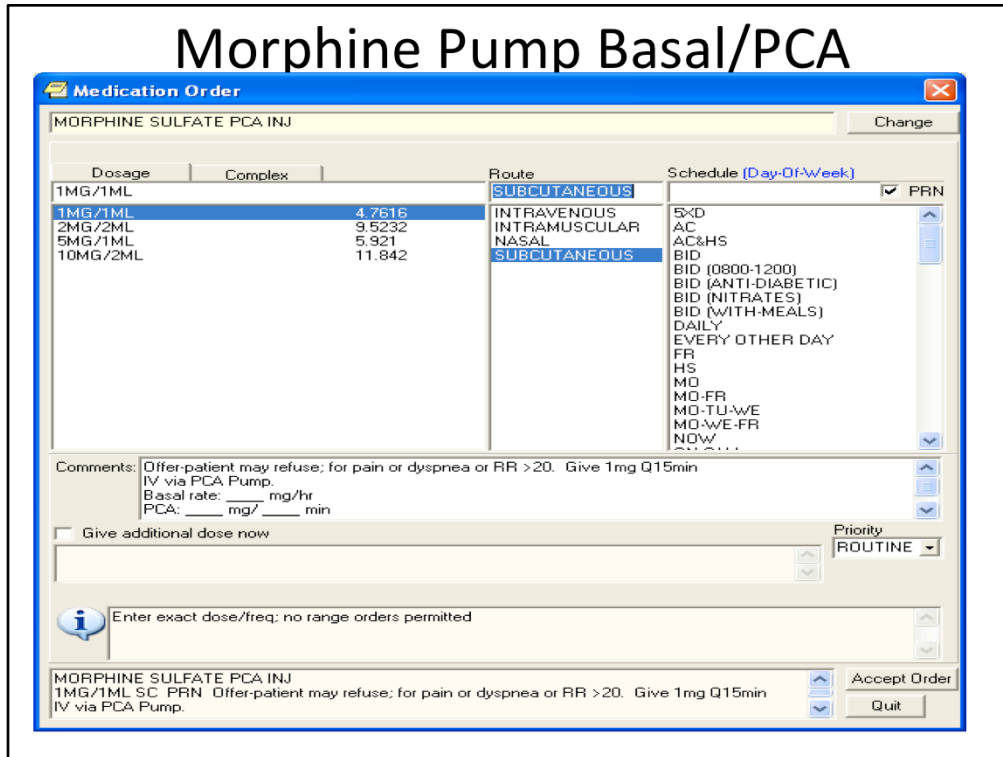

### Morphine Patient Controlled Analgesia (PCA)

This order is set as a default and prompts for ordering a basal rate and the PCA function. For patients who are relatively opioid naïve and able to use the PCA function, one can set the PCA for 8-12 hours, and then use the number of demands and doses given as a guide to set a basal rate.

For patients who have been on oral opioids and are no longer able to continue the oral route, providers should use the Opioid Analgesic Dosing Card to convert to morphine equivalents and then use the 3:1 Po: IV/SQ ratio to convert to total parenteral dose for 24 hours, which when divided by 24 hours, will give the hourly rate.

It is usually recommended to start with 75% of the calculated dose and titrate up, unless the patient is in a pain crisis and clearly needs a higher dose.

Note that if a patient is not able to use the PCA function and basal dose is set, providers can use the previous MS 2 mg (or higher dose if needed) q 2hour, offer may refuse as the break-through regimen for the pump.

## Morphine Infusing for Higher Concentration

| Dosage   | Complex | Route         | Schedule (Day-Of-Week) |
|----------|---------|---------------|------------------------|
| 10MG/1ML |         | SUBCUTANEOUS  | 5XD                    |
| 10MG/1ML |         | SUBCUTANEOUS  | AC                     |
|          |         | INTRAMUSCULAR | AC&HS                  |
|          |         | INTRAVENOUS   | BID                    |
|          |         | NASAL         | BID (0800-1200)        |
|          |         |               | BID (ANTI-DIABETIC)    |
|          |         |               | BID (NITRATES)         |
|          |         |               | BID (WITH-MEALS)       |
|          |         |               | DAILY                  |
|          |         |               | EVERY OTHER DAY        |
|          |         |               | FR                     |
|          |         |               | HS                     |
|          |         |               | MO                     |
|          |         |               | MO-FR                  |
|          |         |               | MO-TU-WE               |
|          |         |               | MO-WE-FR               |
|          |         |               | NOV                    |

Comments: SUBCUTANEOUS INFUSION RATE: \_\_\_\_\_

Give additional dose now

Priority: ROUTINE

CONC: 10MG/ML

MORPHINE HOSPICE INFUSION INJ  
10MG/1ML SC PRN SUBCUTANEOUS INFUSION RATE: \_\_\_\_\_

Accept Order  
Quit

Some programs may have access to the portable CADD or infusion pumps for patients who need a chronic opioid infusion. The advantage of this form of subcutaneous infusion is that the morphine is concentrated, and this will allow the patient to go much longer between morphine reservoir exchanges. This is particularly helpful if the hourly rate is greater than 5mg. For many standard PCA pumps, the syringes contain only 60mg of morphine and will need to be changed every 12 hours. The other advantage is that the pump is smaller, not connected to a pole, and allows the patient to ambulate more easily.

The experience of the teams using the CCOS is that only a small number of patients need this modality, but it can be very helpful to control pain for that select group.

## Other Opioids

**Medication Order**

Oxycodone IR CAP, ORAL

| Dosage | Complex | Route | Schedule (Day-Of-Week) | PRN                      |
|--------|---------|-------|------------------------|--------------------------|
| 5MG    | 0.0539  | ORAL  | Q4HR                   | <input type="checkbox"/> |
| 10MG   | 0.1078  | ORAL  | Q4HR                   | <input type="checkbox"/> |

Comments: Offer patient may refuse for pain or dyspnea, do not wake  
RR > 20/minute

Give additional dose now

Admin. Time: 0200-0600-1000-1400-1800-2200

Expected First Dose: TODAY (Aug 11, 10) at 14:00

Priority: ROUTINE

Enter exact dose/freq; no range orders permitted

Oxycodone IR CAP, ORAL  
5MG PO Q4HR Offer patient may refuse for pain or dyspnea, do not wake  
RR > 20/minute

Accept Order  
Quit

### Other Opioids

There are a number of other opioid medications that are helpful and may be preferred in individual patients receiving palliative care.

However, listing too many options often confuses the primary care provider who may need to use the CCOS protocol. It is important to remember that oral tablets, like this oxycodone, may be a barrier to adequate opioid therapy as patients decline and are no longer able to swallow tablets. It is important to have a sublingual or subcutaneous rescue available so that response to patient distress with pain is not unduly delayed.

### Other Opioids

**Methadone.** This is an excellent option for some patients, but dosing may be more difficult and many facilities do have parenteral methadone options available. This is an opioid for which guidance by the experienced palliative care team is needed, and it is not safe to offer as a default medication.

**Hydromorphone.** This is an excellent option for some patients. There is currently no hydromorphone concentrate, so sublingual therapy is not an option. This medication can be given subcutaneously, either intermittently or using a PCA pump. This is a much more potent medication, and an experienced palliative care team should supervise therapy.

**Fentanyl Patch:** This option may be appropriate but should be prescribed only after dose finding is completed. Supervision by experienced providers is recommended.

# Linking Laxative Therapy to Opioid Therapy

Comfort Care Opioid Orders

**PAIN AND DYSPNEA (OPIOIDS):** Opioids usually most effective. Calculate morphine equivalents used in recent past adjust a SL q2hr offer patient may refuse.  
**PO meds offer longer duration of action than IV/subQ.**  
**Morphine PO to IV equivalent is 3:1.**

|   |                                       |
|---|---------------------------------------|
| 1 | Morphine 5mg SL Q2hr                  |
| 2 | Morphine 5mg PO Q2hr                  |
| 3 | Morphine 2mg SQ Q2hr                  |
| 4 | Morphine 1mg IV PCA Pump per Protocol |
| 5 | Morphine 500mg/NS 50ml SQ Infusion    |
| 6 | Oxycodone                             |

**CONSTIPATION: Initiate if on opioids or no BM x 2 days.**

|    |                                      |
|----|--------------------------------------|
| 7  | Please check for impaction           |
| 8  | Bisacodyl 5mg PO BID                 |
| 9  | Sennosides 17.2mg PO BID (may crush) |
| 10 | Docusate 250mg PO BID                |
| 11 | MDM 30ml PO DAILY PRN constipation   |
| 12 | Lactulose 30gm/45ml DAILY            |
| 13 | Bisacodyl SUPP 10MG PR DAILY PRN     |
| 14 | Fleets enema PR DAILY PRN            |

## Constipation

There is a separate section for constipation, because it is important to order a bowel regimen whenever patients are prescribed opioids. If choices for laxatives have already been chosen when an opioid was ordered, the clinician may skip this section.

The constipation section appears later under its own heading, so that if a modification of the bowel regimen is needed, the CCOS can be opened and the clinician can easily select that section to place orders.

The first step is a nursing text order to check for impaction. Unless a rectal exam has been done the same day, it is almost always good practice to check for impaction.

# Bisacodyl

| Dosage | Complex | Route | Schedule (Day-Of-Week) |
|--------|---------|-------|------------------------|
| 5MG    | 0.0226  | ORAL  | BID                    |
| 10MG   | 0.0452  |       |                        |
| 15MG   | 0.0678  |       |                        |
| 20MG   | 0.0904  |       |                        |

Comments:

Give additional dose now

Admin Time: 0900-2100

Expected First Dose: TODAY (Aug 07, 10) at 21:00

BISACODYL TAB.EC  
5MG PO BID

Priority: ROUTINE

Accept Order  
Quit

There are two large bowel stimulants, bisacodyl and senna. One of these laxatives should be used to prevent constipation when opioids are prescribed. There is no strong evidence for the superiority of one large bowel stimulant over the other. However, senna may require a larger number of tablets and pill burden may be a consideration.

The default is for one tablet BID, but can be escalated easily.



# Senna

The screenshot shows a 'Medication Order' window for 'SENNA TAB'. The window contains the following information:

| Dosage | Complex | Route    | Schedule (Day-Of-Week) | PRN                      |
|--------|---------|----------|------------------------|--------------------------|
| 17.2MG | 0.0128  | ORAL     | BID                    | <input type="checkbox"/> |
| 8.6MG  | 0.0064  | ORAL     | 5xD                    |                          |
| 17.2MG | 0.0128  | NG TUBE  | AC                     |                          |
|        |         | G TUBE   | AC&HS                  |                          |
|        |         | J TUBE   | BID                    |                          |
|        |         | PEG TUBE | BID (0800-1200)        |                          |
|        |         |          | BID (ANTI-DIABETIC)    |                          |
|        |         |          | BID (NITRATES)         |                          |
|        |         |          | BID (WITH-MEALS)       |                          |
|        |         |          | DAILY                  |                          |
|        |         |          | EVERY OTHER DAY        |                          |
|        |         |          | FR                     |                          |
|        |         |          | HS                     |                          |
|        |         |          | MO                     |                          |
|        |         |          | MO-FR                  |                          |
|        |         |          | MO-TU-WE               |                          |
|        |         |          | MO-WE-FR               |                          |
|        |         |          | NOW                    |                          |
|        |         |          | ON CALL                |                          |
|        |         |          | ON CALL-OR             |                          |
|        |         |          | ONCE                   |                          |

Comments: MAY CRUSH

Give additional dose now

Admin Time: 0900-2100

Priority: ROUTINE

Expected First Dose: TODAY (Aug 07, 10) at 21:00

DISP IN MULT OF 100

SENNA TAB  
17.2MG PO BID MAY CRUSH

Buttons: Accept Order, Quit

Senna is an effective laxative for constipation and may be the preference of the patient or clinician. The default dose is 2 tablets BID, which is comparable to the bisacodyl dose in the previous slide.

# Docosate: A Stool Softener

| Dosage | Complex | Route | Schedule (Day-Of-Week) |
|--------|---------|-------|------------------------|
| 250MG  |         | ORAL  | BID                    |
| 250MG  | 0.0424  | ORAL  | BID                    |
| 500MG  | 0.0848  | ORAL  | BID                    |

Comments:

Give additional dose now

Admin Time: 0900-2100

Expected First Dose: TODAY (Aug 07, 10) at 21:00

DOCUSATE SODIUM CAP,ORAL  
250MG PO BID

Priority: ROUTINE

Accept Order  
Quit

Docosate

This is a stool softener, not a laxative. It is commonly given with senna or bisacodyl to aid with elimination. Docosate only is not adequate for opioid constipation prophylaxis.



# Fleets Enema

| Dosage                                  | Complex | Route  | Schedule (Day-Of-Week) | PRN                                 |
|-----------------------------------------|---------|--------|------------------------|-------------------------------------|
| 1 UNIT OF ENEMA, NA PHOSPHATE 4.5OZ EA  |         | RECTAL | DAILY                  | <input checked="" type="checkbox"/> |
| 1 UNIT OF ENEMA, NA PHOSPHATE 4.5OZ EA  |         | RECTAL | 5XD                    |                                     |
| 2 UNITS OF ENEMA, NA PHOSPHATE 4.5OZ EA |         |        | AC                     |                                     |
|                                         |         |        | AC&HS                  |                                     |
|                                         |         |        | BID                    |                                     |
|                                         |         |        | BID (0800-1200)        |                                     |
|                                         |         |        | BID (ANTI-DIABETIC)    |                                     |
|                                         |         |        | BID (NITRATES)         |                                     |
|                                         |         |        | BID (WITH-MEALS)       |                                     |
|                                         |         |        | DAILY                  |                                     |
|                                         |         |        | EVERY OTHER DAY        |                                     |
|                                         |         |        | FR                     |                                     |
|                                         |         |        | HS                     |                                     |
|                                         |         |        | MO                     |                                     |
|                                         |         |        | MO-FR                  |                                     |
|                                         |         |        | MO-TU-WE               |                                     |
|                                         |         |        | MO-WE-FR               |                                     |
|                                         |         |        | NOV                    |                                     |
|                                         |         |        | ON CALL                |                                     |
|                                         |         |        | ON CALL-OR             |                                     |
|                                         |         |        | ONCE                   |                                     |
|                                         |         |        | ONE TIME               |                                     |
|                                         |         |        | OTHER                  |                                     |
|                                         |         |        | PC                     |                                     |

Comments: MAY REPEAT X1

Give additional dose now

Priority: ROUTINE

ENEMA, NA PHOSPHATE 4.5OZ EA  
1 UNIT RTL DAILY PRN MAY REPEAT X1

Accept Order  
Quit

## Fleets Enema

Some selected patients may benefit from a small enema, rather than a suppository. This is an option for nursing staff to use at their discretion for patient safety.

Other treatments for constipation:

- 1) Polyethylene Glycol (Miralax) is an effective laxative and may be a good adjuvant to a laxative plan.
- 2) Methylnaltrexone injection is an opioid antagonist for mu receptors in the large bowel and can stimulate a bowel movement in patients with opioid induced constipation. This is a rescue medication and is needed when inadequate attention to a laxative program has occurred leading to obstipation or, more rarely, when there is unrelieved constipation in intractable case.
- 3) There is limited information on the relative merits of various types of enemas. With limited evidence available, it has been our practice to use tap water with castile soap, rather than lactulose, molasses, or other mixtures.

## Nausea and Delirium (Phenothiazines)

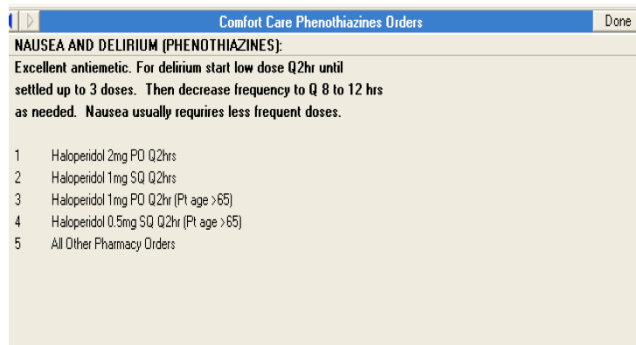

### Nausea and Delirium (Phenothiazines)

Part of the goal of the CCOS is to encourage a Portmanteau approach to treatment of symptoms. This means to use a relatively small number of medications that may benefit a number of symptoms and have flexibility in administration.

The options for treatment of both delirium and nausea/vomiting are many. It would be the role of the hospice and palliative care team to provide expertise to choose wisely, however, it is ideal to have a first line treatment option.

Haloperidol was chosen for this role, because it is effective for both delirium and nausea/vomiting and can be given PO, IV, or SQ. If not adequately effective after 12-24 hours, the palliative care team can adjust the regimen.

The Cochrane Library review of the treatment of delirium concluded that low dose haloperidol was safe and effective when compared to other medication options. Haloperidol is also closely related to droperidol. Both work through the dopamine receptors in the CTZ. These medications have similar modes of action as prochlorperazine (Compazine) or metoclopramide. Therefore, haloperidol is helpful for two common symptoms simultaneously.

## Nausea and Delirium (Phenothiazines)

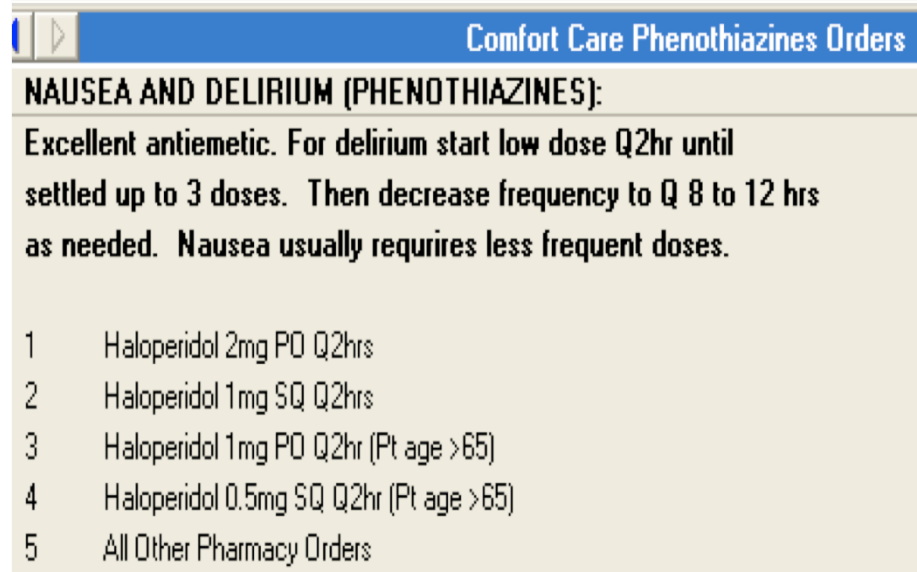

The screenshot shows a software interface for entering orders. At the top, there is a blue header bar with the text "Comfort Care Phenothiazines Orders". Below this, a section titled "NAUSEA AND DELIRIUM (PHENOTHIAZINES):" contains a paragraph of instructions: "Excellent antiemetic. For delirium start low dose Q2hr until settled up to 3 doses. Then decrease frequency to Q 8 to 12 hrs as needed. Nausea usually requires less frequent doses." Below the instructions is a numbered list of five options:

- 1 Haloperidol 2mg PO Q2hrs
- 2 Haloperidol 1mg SQ Q2hrs
- 3 Haloperidol 1mg PO Q2hr (Pt age >65)
- 4 Haloperidol 0.5mg SQ Q2hr (Pt age >65)
- 5 All Other Pharmacy Orders

### Nausea and Delirium (Phenothiazines)

Haloperidol orders have 4 simple choices. There are haloperidol orders based on age, with higher doses for younger patients (less than 65) and dose reduction for older patients. The medication can also be ordered PO or SQ. The SQ dose is half the oral dose, because it is more potent in this form. It is advised that an order be placed, so that that staff can respond quickly in case symptoms arise.

The observation of the BEACON research team has been that the SQ route is most commonly used. Delirious patients are often unable to take an oral medication safely and taking an oral medication when nauseated or vomiting is difficult.

If a different medication is desired, there is an option to go to the pharmacy menu directly.

# Haloperidol Order Examples

| Dosage      | Complex | Route         | Schedule (Day-Of-Week) | PRN                                 |
|-------------|---------|---------------|------------------------|-------------------------------------|
| 1MG         |         | SUBCUTANEOUS  | Q2HR                   | <input checked="" type="checkbox"/> |
| 1MG/0.2ML   | 0.1696  | INTRAMUSCULAR | PC                     |                                     |
| 2MG/0.4ML   | 0.3392  | INTRAVENOUS   | PC&HS                  |                                     |
| 2.5MG/0.5ML | 0.424   | SUBCUTANEOUS  | Q MONTH                |                                     |
| 5MG/1ML     | 0.848   |               | Q10MIN                 |                                     |
| 10MG/2ML    | 1.696   |               | Q12HR                  |                                     |
|             |         |               | Q15MIN                 |                                     |
|             |         |               | Q18H                   |                                     |
|             |         |               | Q1HR                   |                                     |
|             |         |               | Q24HR                  |                                     |
|             |         |               | Q2HR                   |                                     |
|             |         |               | Q-2WEEKS               |                                     |
|             |         |               | Q30 MINS               |                                     |
|             |         |               | Q3D                    |                                     |
|             |         |               | Q3HR                   |                                     |
|             |         |               | Q-3WEEKS               |                                     |
|             |         |               | Q48HR                  |                                     |
|             |         |               | Q4HR                   |                                     |
|             |         |               | Q-4WEEKS               |                                     |
|             |         |               | Q5MIN                  |                                     |
|             |         |               | Q5HR                   |                                     |
|             |         |               | Q72HR                  |                                     |
|             |         |               | Q8HR                   |                                     |
|             |         |               | Q96H                   |                                     |
|             |         |               | QAM                    |                                     |
|             |         |               | QAM (ANTI-DIABETIC)    |                                     |
|             |         |               | QAM&QPM                |                                     |

Comments: Up to 3 doses total or until settled, then q8hrs PRN, for nausea & delirium. Do not exceed 5mg in 24 hours

Give additional dose now

Priority: ROUTINE

HALOPERIDOL INJ,SOLN  
1MG SC Q2HR PRN Up to 3 doses total or until settled, then q8hrs PRN, for nausea & delirium. Do not exceed 5mg in 24 hours

Accept Order  
Quit

The following four pages are examples of the four order options for the management of delirium or nausea/vomiting.

Note the following features of the haloperidol order.

Haloperidol is ordered as a PRN (as needed ) medication and is not scheduled. The order is for an initial dose to be administered followed by q 2hour doses for no more than a total of 3 doses or until settled. This means that, if a single dose relieves the distressing symptoms of delirium, then additional doses may be given every 8 hours as needed.

Many patients may need 2, or less commonly, 3, doses to control distressing symptoms of delirium. The order allows for dose finding and titration to customize the medication to the patient's symptoms at the lowest effective dose, while at the same time, achieving control of distressing symptoms in 4-6 hours. If a patient does not have adequate control of symptoms in this time frame, treatment recommendations are needed from the hospice and palliative care team.

It may be desirable to place a lock-out order to prevent exceeding a maximum dose over a 24-hour period.

# Haloperidol Order Examples

**Medication Order** HALOPERIDOL TAB Change

| Dosage | Complex | Route    | Schedule (Day-Of-Week) | PRN                                 |
|--------|---------|----------|------------------------|-------------------------------------|
| 2MG    |         | ORAL     | Q2HR                   | <input checked="" type="checkbox"/> |
| 0.5MG  | 0.023   | ORAL     | PC                     |                                     |
| 1MG    | 0.0817  | NG TUBE  | PC&HS                  |                                     |
| 2MG    | 0.081   | G TUBE   | Q MONTH                |                                     |
| 4MG    | 0.102   | J TUBE   | Q10MIN                 |                                     |
| 5MG    | 0.0992  | PEG TUBE | Q12HR                  |                                     |
| 10MG   | 0.1984  |          | Q15MIN                 |                                     |
|        |         |          | Q18H                   |                                     |
|        |         |          | Q1HR                   |                                     |
|        |         |          | Q24HR                  |                                     |
|        |         |          | Q2HR                   |                                     |
|        |         |          | Q-2WEEKS               |                                     |
|        |         |          | Q30 MINS               |                                     |
|        |         |          | Q3D                    |                                     |
|        |         |          | Q3HR                   |                                     |
|        |         |          | Q-3WEEKS               |                                     |
|        |         |          | Q48HR                  |                                     |
|        |         |          | Q4HR                   |                                     |
|        |         |          | Q-4WEEKS               |                                     |
|        |         |          | Q5MIN                  |                                     |
|        |         |          | Q6HR                   |                                     |
|        |         |          | Q72HR                  |                                     |
|        |         |          | Q8HR                   |                                     |
|        |         |          | Q96H                   |                                     |
|        |         |          | QAM                    |                                     |
|        |         |          | QAM (ANTI-DIABETIC)    |                                     |
|        |         |          | QAM&QPM                |                                     |
|        |         |          | QHS                    |                                     |
|        |         |          | QHS PRN                |                                     |

Comments: Up to 3 doses total or until settled, then q8hrs PRN, for nausea & delirium. Do not exceed 6 mg in 24 hours

Give additional dose now

Priority: ROUTINE

HALOPERIDOL TAB  
2MG PO Q2HR PRN Up to 3 doses total or until settled, then q8hrs PRN, for nausea & delirium. Do not exceed 6 mg in 24 hours

Accept Order  
Quit

This is the example of the oral haloperidol order for patients less than 65 years of age



# Haloperidol Order Examples

| Dosage | Complex | Route    | Schedule (Day-Of-Week) | PRN                                 |
|--------|---------|----------|------------------------|-------------------------------------|
| 1MG    |         | ORAL     | Q2HR                   | <input checked="" type="checkbox"/> |
| 0.5MG  | 0.023   | ORAL     | PC                     |                                     |
| 1MG    | 0.0817  | NG TUBE  | PC&HS                  |                                     |
| 2MG    | 0.051   | G TUBE   | Q MONTH                |                                     |
| 4MG    | 0.102   | J TUBE   | Q10MIN                 |                                     |
| 5MG    | 0.0992  | PEG TUBE | Q12HR                  |                                     |
| 10MG   | 0.1984  |          | Q15MIN                 |                                     |
|        |         |          | Q18H                   |                                     |
|        |         |          | Q1HR                   |                                     |
|        |         |          | Q24HR                  |                                     |
|        |         |          | Q2HR                   |                                     |
|        |         |          | Q-2WEEKS               |                                     |
|        |         |          | Q30 MINS               |                                     |
|        |         |          | Q3D                    |                                     |
|        |         |          | Q3HR                   |                                     |
|        |         |          | Q-3WEEKS               |                                     |
|        |         |          | Q48HR                  |                                     |
|        |         |          | Q4HR                   |                                     |
|        |         |          | Q-4WEEKS               |                                     |
|        |         |          | Q5MIN                  |                                     |
|        |         |          | Q6HR                   |                                     |
|        |         |          | Q72HR                  |                                     |
|        |         |          | Q8HR                   |                                     |
|        |         |          | Q96H                   |                                     |
|        |         |          | QAM                    |                                     |
|        |         |          | QAM (ANTI-DIABETIC)    |                                     |
|        |         |          | QAM&QPM                |                                     |
|        |         |          | QHS                    |                                     |

Comments: Up to 3 doses total or until settled, then q8hrs PRN, for nausea & delirium. Do not exceed 5 mg in 24 hours

Give additional dose now

Priority: ROUTINE

HALOPERIDOL TAB  
1MG PO Q2HR PRN Up to 3 doses total or until settled, then q8hrs PRN, for nausea & delirium. Do not exceed 5 mg in 24 hours

Accept Order  
Quit

Example of the haloperidol subcutaneous route with geriatric dosing

The haloperidol orders are dose-adjusted for geriatric patients (65 years of age and older). These lower doses may be appropriate for younger patients, if they have debility or low body weight.

The operational aspects are the same for all of the haloperidol order options. Some providers will order both an oral and subcutaneous route to provide flexibility to nursing staff.

# Haloperidol Order Examples

**Medication Order**

HALOPERIDOL INJ.SOLN Change

| Dosage      | Complex | Route         | Schedule (Day-Of-Week) | PRN                                 |
|-------------|---------|---------------|------------------------|-------------------------------------|
| 0.5MG       |         | SUBCUTANEOUS  | Q2HR                   | <input checked="" type="checkbox"/> |
| 1MG/0.2ML   | 0.1696  | INTRAMUSCULAR | PC                     |                                     |
| 2MG/0.4ML   | 0.3392  | INTRAVENOUS   | PC&HS                  |                                     |
| 2.5MG/0.5ML | 0.424   | SUBCUTANEOUS  | Q MONTH                |                                     |
| 5MG/1ML     | 0.848   |               | Q 0MIN                 |                                     |
| 10MG/2ML    | 1.696   |               | Q 12HR                 |                                     |
|             |         |               | Q 15MIN                |                                     |
|             |         |               | Q 18H                  |                                     |
|             |         |               | Q 1HR                  |                                     |
|             |         |               | Q 24HR                 |                                     |
|             |         |               | Q 2HR                  |                                     |
|             |         |               | Q-2WEEKS               |                                     |
|             |         |               | Q 30 MINS              |                                     |
|             |         |               | Q 3D                   |                                     |
|             |         |               | Q 3HR                  |                                     |
|             |         |               | Q-3WEEKS               |                                     |
|             |         |               | Q 48HR                 |                                     |
|             |         |               | Q 4HR                  |                                     |
|             |         |               | Q-4WEEKS               |                                     |
|             |         |               | Q 5MIN                 |                                     |
|             |         |               | Q 6HR                  |                                     |
|             |         |               | Q 72HR                 |                                     |
|             |         |               | Q 8HR                  |                                     |
|             |         |               | Q 96H                  |                                     |
|             |         |               | Q AM                   |                                     |
|             |         |               | Q AM (ANTI-DIABETIC)   |                                     |
|             |         |               | Q AM&Q PM              |                                     |

Comments: Up to 3 doses total or until settled, then q8hrs PRN, for nausea & delirium. Do not exceed 3mg in 24 hours

Give additional dose now

Priority: ROUTINE

HALOPERIDOL INJ.SOLN  
0.5MG SC Q2HR PRN Up to 3 doses total or until settled, then q8hrs PRN, for nausea & delirium. Do not exceed 3mg in 24 hours

Accept Order  
Quit

Example of the haloperidol oral route with geriatric dosing

The haloperidol orders are dose-adjusted for geriatric patients (65 years of age and older). These lower doses may be appropriate for younger patients if they have debility or low body weight.

The operational aspects are the same for all of the haloperidol order options. Some providers will order both an oral and subcutaneous route to provide flexibility to nursing staff.

## Example of Other Medication Option

The screenshot displays a software interface for managing medication orders. At the top, a blue header bar reads "Common Care Phenothiazines Orders" with a "Done" button on the right. Below this, a text box contains the following instructions: "NAUSEA AND DELIRIUM (PHENOTHIAZINES): Excellent antiemetic. For delirium start low dose Q2hr until settled up to 3 doses. Then decrease frequency to Q 8 to 12 hrs as needed. Nat". To the right of this text is a "VistaWe" button. A "Medication Order" window is open, showing a list of medication options. The list includes:

- 1 Haloperidol
- 2 Haloperidol
- 3 Haloperidol
- 4 Haloperidol
- 5 All Other Pt

The main window displays a list of medication codes and descriptions:

- (No quick orders available)
- 125261 <WAFER WAFER >
- 125262 <WAFER WAFER >
- 401932 <POUCH,OSTOMY POUCH >
- 0.45% NAACL/5% DEXTROSE <DEXTROSE 5%/SODIUM CHLORIDE 0.45% INJ,SOLN >
- 0.45%NS <SODIUM CHLORIDE 0.45% INJ >
- 0.9% NAACL <SODIUM CHLORIDE 0.9% (Bacteriostatic) INJ >
- 0.9% NAACL <SODIUM CHLORIDE 0.9% (PRES. FREE) INJ >
- 0.9% NAACL <SODIUM CHLORIDE 0.9% FLUSH INJ >
- 0.9% NAACL <SODIUM CHLORIDE 0.9% INJ >
- 0.9% NAACL IRRIGATION <SODIUM CHLORIDE 0.9% IRRIG. SOLN,IRRG >
- 0.9% SODIUM CHLORIDE <SODIUM CHLORIDE 0.9% (Bacteriostatic) INJ >
- 0.9% SODIUM CHLORIDE <SODIUM CHLORIDE 0.9% FLUSH INJ >
- 0.9% SODIUM CHLORIDE <SODIUM CHLORIDE 0.9% INJ >

If providers need to order a different medication for delirium or nausea, they can do so without leaving the order set.

## Anxiety and Seizure(Benzodiazepines)

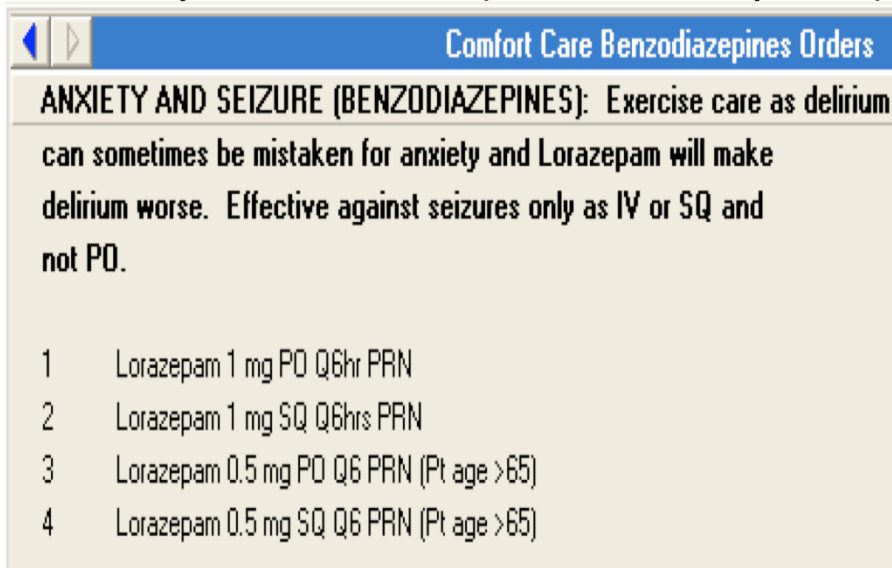

The screenshot shows a window titled "Comfort Care Benzodiazepines Orders". Below the title bar, there is a header for "ANXIETY AND SEIZURE (BENZODIAZEPINES): Exercise care as delirium can sometimes be mistaken for anxiety and Lorazepam will make delirium worse. Effective against seizures only as IV or SQ and not PO." Below this header, there is a list of four order options:

- 1 Lorazepam 1 mg PO Q6hr PRN
- 2 Lorazepam 1 mg SQ Q6hrs PRN
- 3 Lorazepam 0.5 mg PO Q6 PRN (Pt age >65)
- 4 Lorazepam 0.5 mg SQ Q6 PRN (Pt age >65)

### Anxiety and Seizures

Anxiety and seizures are distressing symptoms that can occur in patients at the end of life. Using the Portmanteau medication guideline, lorazepam is a good choice for a benzodiazepine, because it can be given PO, IV, or SQ and is effective also as an anticonvulsant.

The use of benzodiazepines at end of life must be carefully monitored due to the risk of mistaking delirium for anxiety and the risk of inducing delirium with this medication. Nonetheless, many patients are anxious due to their illness and/or experience worsening anxiety due to other treatments. A good example of this is COPD, in which dyspnea is commonly a cause of anxiety and albuterol may contribute as well.

Note that lorazepam is an effective anticonvulsant when given IV/SQ, but not PO. Patients with history of seizures or who have a disease process, such as brain metastases, may develop seizures when they are no longer able to take oral anticonvulsants, making this a good option.

There are four order options with either oral or parenteral routes and dose adjustment for older patients.

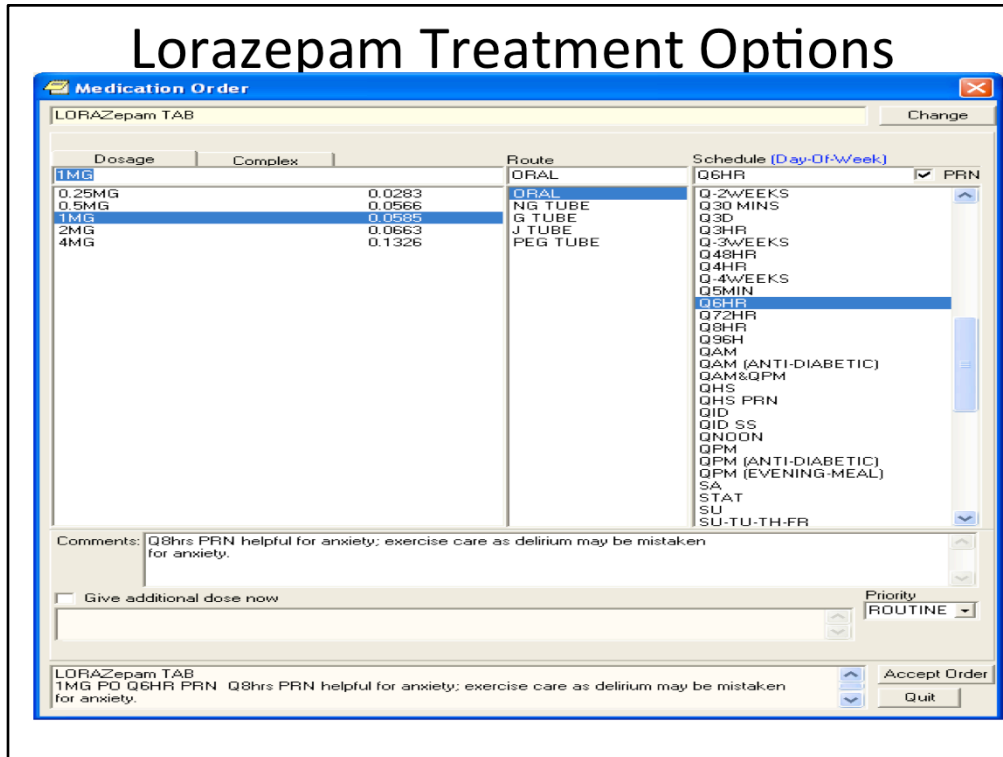

Lorazepam for Anxiety and Seizures

Lorazepam 1mg PO q 6HR PRN

Note the following features of these orders:

Lorazepam is always ordered as a PRN (as needed) medication as the default. If a patient has been on scheduled benzodiazepines, then changing the order to “scheduled “by clicking off the PRN button may be appropriate to prevent withdrawal.

There is a warning to nursing staff to consider delirium first as a cause of anxiety and agitation and to consider whether treatment for delirium may be indicated first.

There are orders for both oral and parenteral forms of lorazepam. Remember that only parenteral forms should be used to treat seizures.

# Lorazepam Treatment Options

**Medication Order**

LORAZEPAM INJ Change

| Dosage / Rate | Complex | Route         | Schedule (Day-Of-Week) | PRN                                 |
|---------------|---------|---------------|------------------------|-------------------------------------|
| 1MG/0.5ML     |         | SUBCUTANEOUS  | Q6HR                   | <input checked="" type="checkbox"/> |
| 0.5MG/0.25ML  | 0.128   | IV PUSH       | Q-2WEEKS               |                                     |
| 1MG/0.5ML     | 0.256   | INTRAMUSCULAR | Q30 MINS               |                                     |
| 2MG/1ML       | 0.512   | INTRAVENOUS   | Q3D                    |                                     |
| 3MG/1.5ML     | 0.768   | NASAL         | Q3HR                   |                                     |
| 4MG/2ML       | 1.024   | SUBCUTANEOUS  | Q-3WEEKS               |                                     |
| 6MG/3ML       | 1.536   |               | Q48HR                  |                                     |
|               |         |               | Q4HR                   |                                     |
|               |         |               | Q-4WEEKS               |                                     |
|               |         |               | Q5MIN                  |                                     |
|               |         |               | Q6HR                   |                                     |
|               |         |               | Q72HR                  |                                     |
|               |         |               | Q8HR                   |                                     |
|               |         |               | Q96H                   |                                     |
|               |         |               | QAM                    |                                     |
|               |         |               | QAM (ANTI-DIABETIC)    |                                     |
|               |         |               | QAM&QPM                |                                     |
|               |         |               | QHS                    |                                     |
|               |         |               | QHS PRN                |                                     |
|               |         |               | QID                    |                                     |
|               |         |               | QID SS                 |                                     |

Comments: Q8hrs PRN helpful for anxiety; exercise care as delirium may be mistaken for anxiety.

Give additional dose now Priority: ROUTINE

DISP PER INJ (10/BOX)

LORAZEPAM INJ  
1MG/0.5ML SC Q6HR PRN Q8hrs PRN helpful for anxiety; exercise care as delirium may be mistaken

Accept Order  
Quit

Lorazepam 1mg IV/SQ q 6HR PRN

Lorazepam is always ordered as a PRN (as needed) medication as the default. If a patient has been on scheduled benzodiazepines, then changing the order to “scheduled” by clicking off the PRN button may be appropriate to prevent withdrawal.

There is a warning to nursing staff to consider delirium first as a cause of anxiety and agitation and to consider whether treatment for delirium may be indicated first.

There are orders for both oral and parenteral forms of lorazepam. Remember that only parenteral forms should be used to treat seizures.

# Lorazepam Treatment Options

| Dosage | Complex | Route    | Schedule (Day-Of-Week) |
|--------|---------|----------|------------------------|
| 1MG    |         | ORAL     | Q6HR PRN               |
| 0.25MG | 0.0283  | ORAL     | Q-2WEEKS               |
| 0.5MG  | 0.0566  | NG TUBE  | Q 30 MINS              |
| 1MG    | 0.0585  | G TUBE   | Q 3D                   |
| 2MG    | 0.0663  | J TUBE   | Q 3HR                  |
| 4MG    | 0.1326  | PEG TUBE | Q-3WEEKS               |
|        |         |          | Q48HR                  |
|        |         |          | Q4HR                   |
|        |         |          | Q-4WEEKS               |
|        |         |          | Q5MIN                  |
|        |         |          | Q6HR                   |
|        |         |          | Q72HR                  |
|        |         |          | Q8HR                   |
|        |         |          | Q96H                   |
|        |         |          | QAM                    |
|        |         |          | QAM (ANTI-DIABETIC)    |
|        |         |          | QAM&QPM                |
|        |         |          | QHS                    |
|        |         |          | QHS PRN                |
|        |         |          | QID                    |
|        |         |          | QID SS                 |
|        |         |          | QNODN                  |
|        |         |          | QPM                    |
|        |         |          | QPM (ANTI-DIABETIC)    |
|        |         |          | QPM (EVENING-MEAL)     |
|        |         |          | SA                     |
|        |         |          | STAT                   |
|        |         |          | SU                     |
|        |         |          | SU-TU-TH-FR            |
|        |         |          | SU-TU-TH-SA            |

Comments: Q8hrs PRN helpful for anxiety; exercise care as delirium may be mistaken for anxiety.

Give additional dose now

Priority: ROUTINE

LORAZepam TAB  
1MG PO Q6HR PRN Q8hrs PRN helpful for anxiety; exercise care as delirium may be mistaken for anxiety.

Accept Order  
Quit

Lorazepam 0.5MG PO q 6HR PRN

Example of the lorazepam oral route with geriatric dosing

The lorazepam orders are dose-adjusted for geriatric patients (65 years of age and older). These lower doses may be appropriate for younger patients if they have debility or low body weight.

The operational aspects are the same for all of the lorazepam order options. Some providers will order both an oral and subcutaneous route to provide flexibility to nursing staff.

# Lorazepam Treatment Options

**Medication Order**

LORAZEPAM INJ Change

| Dosage / Rate | Complex | Route         | Schedule (Day-Of-Week) | PRN                                 |
|---------------|---------|---------------|------------------------|-------------------------------------|
| 0.5MG/0.25ML  |         | SUBCUTANEOUS  | Q6HR                   | <input checked="" type="checkbox"/> |
| 0.5MG/0.25ML  | 0.128   | IV PUSH       | Q-2WEEKS               |                                     |
| 1MG/0.5ML     | 0.256   | INTRAMUSCULAR | Q30 MINS               |                                     |
| 2MG/1ML       | 0.512   | INTRAVENOUS   | Q3D                    |                                     |
| 3MG/1.5ML     | 0.768   | NASAL         | Q3HR                   |                                     |
| 4MG/2ML       | 1.024   | SUBCUTANEOUS  | Q-3WEEKS               |                                     |
| 6MG/3ML       | 1.536   |               | Q48HR                  |                                     |
|               |         |               | Q4HR                   |                                     |
|               |         |               | Q-4WEEKS               |                                     |
|               |         |               | Q5MIN                  |                                     |
|               |         |               | Q6HR                   |                                     |
|               |         |               | Q72HR                  |                                     |
|               |         |               | Q8HR                   |                                     |
|               |         |               | Q96H                   |                                     |
|               |         |               | QAM                    |                                     |
|               |         |               | QAM (ANTI-DIABETIC)    |                                     |
|               |         |               | QAM&QPM                |                                     |
|               |         |               | QHC                    |                                     |

Comments: Helpful for anxiety; exercise care as delirium maybe mistaken for anxiety.

Give additional dose now

Priority: ROUTINE

DISP PER INJ (10/BOx)

LORAZEPAM INJ  
0.5MG/0.25ML SC Q6HR PRN Helpful for anxiety; exercise care as delirium maybe mistaken for anxiety.

Accept Order  
Quit

Lorazepam 0.5MG IV/SQ q 6HR PRN

Example of the lorazepam subcutaneous route with geriatric dosing

The lorazepam orders are dose-adjusted for geriatric patients (65 years of age and older). These lower doses may be appropriate for younger patients if they have debility or low body weight.

The operational aspects are the same for all of the lorazepam order options. Some providers will order both an oral and subcutaneous route to provide flexibility to nursing staff.



## Corticosteroid

The screenshot shows a clinical order set interface. At the top, there is a blue header bar with the text "Comfort Care Corticosteroid Orders". Below this, a light beige box contains the following text:

**PAIN DYSPNEA ANOREXIA ASTHENIA AND DEPRESSION: (Corticosteroid).**

Dexamethasone has less mineral corticoid effect than Prednisone.

AM dosing preferred due to insomnia.

Dexamethasone 1mg is equivalent to Prednisone 6mg.

10 Dexamethasone 4 to 8 mg PO BID with meals

11 Dexamethasone 4 to 8 mg SQ BID (subq not compatible with hydromorphone)

### Corticosteroids

Corticosteroids are helpful adjuvant medications for many patients at the end of life. This class of medication can help with pain by reducing inflammation. For patients with dyspnea, corticosteroids may help reactive airway disease. Many patients experience improvement in appetite and energy level, although the effects are usually short-lived, lasting a few weeks to a month.

There are some relative contraindications to corticosteroids, such as infection, increase in serum glucose, delirium, and insomnia. However, for many patients, the benefits are likely to be greater than the burden of a trial of treatment.

The CCOS advocates for the use of dexamethasone as the corticosteroid of choice in this setting. Dexamethasone has flexibility, in that it can be given PO, IV/, or SQ and is of equivalent strength in oral and parenteral forms. No other commonly used corticosteroid has this flexibility. Because dexamethasone has little mineral corticoid effects, fluid retention may be less common. Dexamethasone is relatively more likely to cause increases in serum glucose than some other forms, but has not been a common issue in clinical practice.

# Dexamethasone

Medication Order
✖

DEXAMETHASONE TAB
Change

| Dosage | Complex | Route    | Schedule (Day-Of-Week)                       |
|--------|---------|----------|----------------------------------------------|
| 4MG    |         | ORAL     | BID (0800-1200) <input type="checkbox"/> PRN |
| 0.5MG  | 0.0355  | ORAL     | 5-XD                                         |
| 0.75MG | 0.057   | NG TUBE  | AC                                           |
| 1MG    | 0.071   | G TUBE   | AC&HS                                        |
| 1.5MG  | 0.1046  | J TUBE   | BID                                          |
| 2MG    | 0.03075 | PEG TUBE | BID (0800-1200)                              |
| 3MG    | 0.2092  |          | BID (ANTI-DIABETIC)                          |
| 4MG    | 0.0615  |          | BID (NITRATES)                               |
| 8MG    | 0.123   |          | BID (WITH-MEALS)                             |
| 12MG   | 0.1845  |          | DAILY                                        |
| 16MG   | 0.246   |          | EVERY OTHER DAY                              |
|        |         |          | FR                                           |
|        |         |          | HS                                           |
|        |         |          | MO                                           |
|        |         |          | MO-FR                                        |
|        |         |          | MO-TU-WE                                     |
|        |         |          | MO-WE-FR                                     |
|        |         |          | NOW                                          |
|        |         |          | ON CALL                                      |
|        |         |          | ON CALL-OR                                   |
|        |         |          | ONCE                                         |
|        |         |          | ONE TIME                                     |
|        |         |          | OTHER                                        |
|        |         |          | PC                                           |
|        |         |          | PC&HS                                        |
|        |         |          | Q MONTH                                      |

Comments: Give with breakfast & lunch

Give additional dose now

Admin Time: 0800-1200

Expected First Dose: TOMORROW (Aug 08, 10) at 08:00

DEXAMETHASONE TAB  
4MG PO BID (0800-1200) Give with breakfast & lunch

Priority  
ROUTINE
Accept Order
Quit

## Dexamethasone

Note the following features of this order:

The orders for dexamethasone call for 4mg or 8mg twice a day at breakfast and noon.

Dexamethasone 4mg is approximately equivalent to prednisone 15mg. Therefore, dexamethasone 16mg per day is equivalent to prednisone 60mg /day, which will provide nearly the maximum anti-inflammatory effect.

Dexamethasone has a very long half-life and could probably be given as a daily dose with equivalent effects. It is clear that giving corticosteroids in the evening may lead to insomnia and potentially more risk of delirium. Although dexamethasone is often given in multiple daily doses, such as q 6 hours, and at much higher doses, such as a total of 40-100mg/day, the benefit of these strategies is not clearly demonstrated.

This order plan of dosing at breakfast and lunch was chosen because providers did not feel comfortable with once a day dosing, and this takes advantage of a potent potential placebo effect by administering the medication with meals.

# Dexamethasone

Medication Order
✖

DEXAMETHASONE INJ.SOLN
Change

| Dosage     | Complex | Route            | Schedule (Day-Of-Week)                       |
|------------|---------|------------------|----------------------------------------------|
| 4MG/1ML    |         | SUBCUTANEOUS     | BID (0800-1200) <input type="checkbox"/> PRN |
| 4MG/1ML    | 0.538   | INTRAMUSCULAR/IN | 5-XD                                         |
| 8MG/1.5ML  | 0.907   | INTRAMUSCULAR    | AC                                           |
| 8MG/2ML    | 1.075   | INTRAVENOUS      | AC&HS                                        |
| 10MG/2.5ML | 1.345   | SUBCUTANEOUS     | BID                                          |
| 12MG/3ML   | 1.614   |                  | BID (0800-1200)                              |
|            |         |                  | BID (ANTI-DIABETIC)                          |
|            |         |                  | BID (NITRATES)                               |
|            |         |                  | BID (WITH-MEALS)                             |
|            |         |                  | DAILY                                        |
|            |         |                  | EVERY OTHER DAY                              |
|            |         |                  | FR                                           |
|            |         |                  | HS                                           |
|            |         |                  | MO                                           |
|            |         |                  | MO-FR                                        |
|            |         |                  | MO-TU-WE                                     |
|            |         |                  | MO-WE-FR                                     |
|            |         |                  | NOW                                          |
|            |         |                  | ON CALL                                      |
|            |         |                  | ON CALL-OR                                   |
|            |         |                  | ONCE                                         |
|            |         |                  | ONE TIME                                     |

Comments: May give SQ if PO meds not tolerated. Give with breakfast & lunch.

Give additional dose now

Admin Time: 0800-1200 Priority: ROUTINE

Expected First Dose: TOMORROW (Aug 08, 10) at 08:00

i DISPENSE PER EACH (ML) (1ML VIAL) IV USE RESTRICTED TO ER/ICU

DEXAMETHASONE INJ.SOLN  
4MG/1ML SC BID (0800-1200) May give SQ if PO meds not tolerated. Give with breakfast & lunch.
Accept Order

Quit

## Dexamethasone SQ/IV

This order is the parenteral version of the oral version and may be used if the oral route is compromised. It is easy to convert back to oral, if desired, and adjust the dose up or down as needed.

This order plan of dosing at breakfast and lunch was chosen because providers did not feel comfortable with once a day dosing and this takes advantage of a potent potential placebo effect by administering the medication with meals.

If the medication is effective, the provider will want to adjust to the lowest dose to maintain the desired effect. If not as effective after a few days, the dose can be escalated.

This medication is particularly helpful if the patient has been on corticosteroids, loses the oral route, and needs to have the medication maintained. It should be noted that dexamethasone has little mineral corticoid effect, and if this effect is desired, a different medication, such as fludrocortisone may be needed.

# Constipation

The screenshot shows a window titled "Constipation" with a blue header bar containing "Comfort Care Constipation". Below the header, a light-colored box contains the following text:

**CONSTIPATION: Initiate if on opioids or no BM x 2 days.**

- 1 Please check for impaction
- 2 Bisacodyl 5mg PO BID
- 3 Sennosides 17.2mg PO DAILY (may crush)
- 4 Docusate 250mg PO BID
- 5 MOM 30ml PO DAILY PRN constipation
- 6 Lactulose 30gm/45ml DAILY
- 7 Bisacodyl SUPP 10MG PR DAILY PRN
- 8 FLeets enema PR DAILY PRN

## Constipation

Note that this has been discussed in relationship to the prompt to order a bowel regimen when ordering opioids. However, since some patients may not be on opioids or because a clinician may want to open the CCOS and to modify the treatment plan for constipation, it has its own section.

All of the options are the same as was discussed previously.

## Management of Secretions

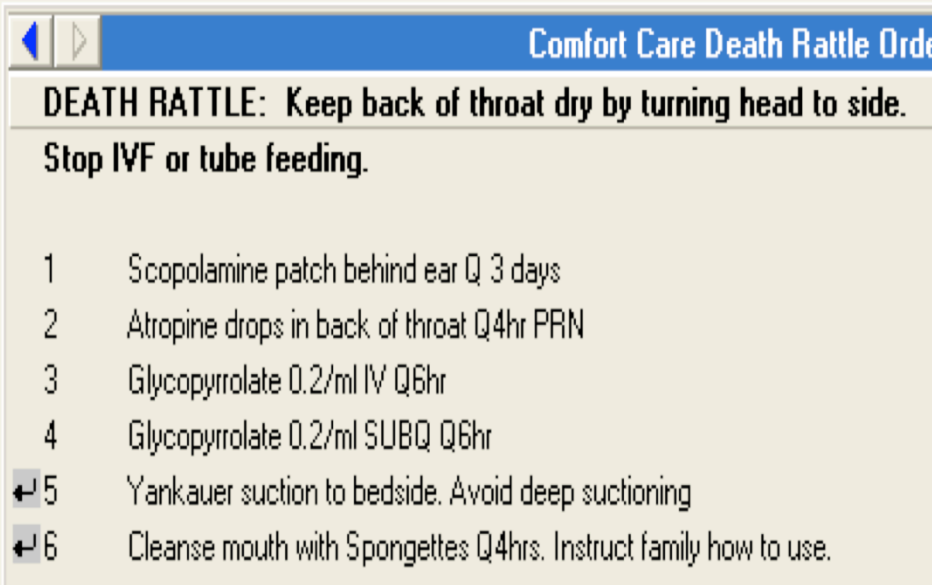

The screenshot shows a medical order set window titled "Comfort Care Death Rattle Order". The main instruction is "DEATH RATTLE: Keep back of throat dry by turning head to side." Below this, it says "Stop IVF or tube feeding." and lists six numbered items:

- 1 Scopolamine patch behind ear Q 3 days
- 2 Atropine drops in back of throat Q4hr PRN
- 3 Glycopyrrolate 0.2/ml IV Q6hr
- 4 Glycopyrrolate 0.2/ml SUBQ Q6hr
- ← 5 Yankauer suction to bedside. Avoid deep suctioning
- ← 6 Cleanse mouth with Spongettes Q4hrs. Instruct family how to use.

### Management of Secretions

Loud, moist breathing at the end of life can be very distressing for families and staff. Patients usually seem to have a lowered level of consciousness and do not seem very distressed. However, families are often concerned that their loved one is suffering.

Repositioning and stopping fluids and tube feedings can be helpful. However, frequent deep suctioning does not appear to be very helpful and certainly can be uncomfortable for the patient .

The following menu offers a number of options for management of secretions. The relative superiority of one approach over another has not been determined. However, all of the medications work by drying the mouth and throat.

These medications contribute to decreased level of consciousness and delirium. Not all patients need these medications. It is important to not start these medications before they are needed, due to their potentially troubling side effects.

# Management of Secretions

**Medication Order**

SCOPOLAMINE TRANSDERMAL PATCH Change

| Dosage               | Complex | Route                        | Schedule (Day-Of-Week)                                                                                                                                                                                                                                                                                                       | PRN                      |
|----------------------|---------|------------------------------|------------------------------------------------------------------------------------------------------------------------------------------------------------------------------------------------------------------------------------------------------------------------------------------------------------------------------|--------------------------|
| 1 PATCH              |         | TOPICAL                      | Q72HR                                                                                                                                                                                                                                                                                                                        | <input type="checkbox"/> |
| 1 PATCH 0.33MG/24HRS | NF      | TOPICAL<br>TOPICAL MISCELLAN | Q30 MINS<br>Q3D<br>Q3HR<br>Q3WEEKS<br>Q48HR<br>Q4HR<br>Q4WEEKS<br>Q5MIN<br>Q6HR<br><b>Q72HR</b><br>Q8HR<br>Q96H<br>QAM<br>QAM (ANTI-DIABETIC)<br>QAM&QPM<br>QHS<br>QHS PRN<br>QID<br>QID SS<br>QNOON<br>QPM<br>QPM (ANTI-DIABETIC)<br>QPM (EVENING-MEAL)<br>SA<br>STAT<br>SU<br>SU-TU-TH-FR<br>SU-TU-TH-SA<br>SU-TU-WE-FR-SA | <input type="checkbox"/> |

Comments: Place behind ear.

Give additional dose now

Admin Time: 0900

Expected First Dose: TOMORROW (Aug 08, 10) at 09:00

SCOPOLAMINE TRANSDERMAL PATCH  
1 PATCH TOP Q72HR Place behind ear.

Priority: ROUTINE

Accept Order

## Scopolamine Patches

This medication has often been used in the home hospice setting. One advantage is that the patch can be placed and will not need to be replaced for most patients, due to relatively short life-expectancy of patients who have a “death rattle.” On the other hand, the medication could take considerable time to take effect, due to absorption time and the scopolamine may linger in the subcutaneous depot if the medication is discontinued.

For these reasons, some providers will want to use one of the more rapid onset medications following this option until the secretions are adequately controlled or in lieu of scopolamine or if prognosis is thought to be only hours.

In some VA pharmacies, this medication is listed as non-formulary and extra steps may be involved to procure it.

# Atropine Drops

Medication Order
✖

ATROPINE SULFATE 1% SOLN.OPH
Change

| Dosage         | Complex | Route      | Schedule (Day-Of-Week)                       |
|----------------|---------|------------|----------------------------------------------|
| 2 DROPS 1%     |         | ORAL       | Q4HR <input checked="" type="checkbox"/> PRN |
| 1 DROP 1%      |         | OPHTHALMIC | Q1HR                                         |
| 2 DROPS 1%     |         | RIGHT EYE  | Q24HR                                        |
| 3 DROPS 1%     |         | LEFT EYE   | Q2HR                                         |
| ONE DROP 1%    |         | BOTH EYES  | Q-2WEEKS                                     |
| TWO DROPS 1%   |         |            | Q30 MINS                                     |
| THREE DROPS 1% |         |            | Q3D                                          |
|                |         |            | Q3HR                                         |
|                |         |            | Q-3WEEKS                                     |
|                |         |            | Q48HR                                        |
|                |         |            | Q4HR                                         |
|                |         |            | Q-4WEEKS                                     |
|                |         |            | Q5MIN                                        |
|                |         |            | Q6HR                                         |
|                |         |            | Q72HR                                        |
|                |         |            | Q8HR                                         |
|                |         |            | Q96H                                         |
|                |         |            | QAM                                          |
|                |         |            | QAM (ANTI-DIABETIC)                          |
|                |         |            | QAM&QPM                                      |
|                |         |            | QHS                                          |
|                |         |            | QHS PRN                                      |

Comments: X24HR Until Scopolamine patch effective.

Give additional dose now

Priority: ROUTINE

DISPENSE PER ML (15ML/BTL)

ATROPINE SULFATE 1% SOLN.OPH 1%  
TWO DROPS ORAL Q4HR PRN X24HR Until Scopolamine patch effective.

Accept Order  
Quit

## Atropine Eye Drops

Atropine is known to dry oral secretions. This treatment has also been used in the home hospice setting and is convenient, because it can be given orally.

It is important to note that the drops are of atropine ophthalmic solution, and the directions are to place in the back of the throat. If using this approach, it is important to explain this non-standard use of the medication to family, nursing staff, and pharmacy.

A note in this order alerts nursing staff that use of atropine is particularly important as an intermittent measure if a scopolamine patch has been placed.

# Glycopyrrolate

Medication Order
✖

GLYCOPYRROLATE INJ INJ,SOLN
Change

| Dosage           | Complex | Route               | Schedule (Day-Of-Week) |
|------------------|---------|---------------------|------------------------|
| <u>0.2MG/1ML</u> |         | SUBCUTANEOUS        | Q6HR                   |
| 0.2MG/1ML        | 0.1236  | INTRAMUSCULAR       | Q.2WEEKS               |
| 0.2MG/1ML        | 0.1532  | INTRAVENOUS         | Q30 MINS               |
| 0.2MG/1ML        | 0.2628  | <u>SUBCUTANEOUS</u> | Q3D                    |
| 0.3MG/1.5ML      | 0.1854  |                     | Q3HR                   |
| 0.4MG/2ML        | 0.2472  |                     | Q.3WEEKS               |
| 0.4MG/2ML        | 0.3064  |                     | Q48HR                  |
|                  |         |                     | Q4HR                   |
|                  |         |                     | Q.4WEEKS               |
|                  |         |                     | Q5MIN                  |
|                  |         |                     | <u>Q6HR</u>            |
|                  |         |                     | Q72HR                  |
|                  |         |                     | Q8HR                   |
|                  |         |                     | Q96H                   |
|                  |         |                     | QAM                    |
|                  |         |                     | QAM (ANTI-DIABETIC)    |
|                  |         |                     | QAM&QPM                |
|                  |         |                     | QHS                    |
|                  |         |                     | QHS PRN                |
|                  |         |                     | QID                    |
|                  |         |                     | QID SS                 |
|                  |         |                     | QNDON                  |
|                  |         |                     | QPM                    |
|                  |         |                     | QPM (ANTI-DIABETIC)    |
|                  |         |                     | QPM (EVENING-MEAL)     |
|                  |         |                     | SA                     |
|                  |         |                     | STAT                   |

Comments:

Give additional dose now

Admin Time: 0600-1200-1800-2400

Expected First Dose: TODAY (Aug 07, 10) at 18:00

GLYCOPYRROLATE INJ INJ,SOLN

0.2MG/1ML SC Q6HR

Priority: ROUTINE

Accept Order

Quit

## Glycopyrrolate

Some providers prefer to use glycopyrrolate for management of secretions. This medication is given by a parenteral route and, fortunately, can be given either subcutaneously or by IV. The subcutaneous route has been used most often in the BEACON program, because it is easier to maintain access.

For patients with secretions that are very difficult to control, an increase in the dose or an increase in frequency (to q 4) may be considered.



## Mouth Care

The screenshot shows a medical order set window with a blue header bar containing the title "Comfort Care Death Rattle Order". Below the header, the text reads: "DEATH RATTLE: Keep back of throat dry by turning head to side. Stop IVF or tube feeding." Below this, there is a numbered list of six orders:

- 1 [Scopolamine patch behind ear Q 3 days](#)
- 2 [Atropine drops in back of throat Q4hr PRN](#)
- 3 [Glycopyrrolate 0.2/ml IV Q6hr](#)
- 4 [Glycopyrrolate 0.2/ml SUBQ Q6hr](#)
- ← 5 [Yankauer suction to bedside. Avoid deep suctioning](#)
- ← 6 Cleanse mouth with Spongettes Q4hrs. Instruct family how to use.

### Mouth Care

Patients at the end of life often need and benefit from mouth care. All patients who receive medication for secretions are likely to have a dry mouth and lips and benefit from mouth care.

This slide demonstrates the two mouth care orders.

One order is for a Yankauer suction set up. Although deep suctioning is discouraged, patients cough or spit up material into the front of the mouth and a Yankauer is helpful with clearing this material.

Spongettes with water can be used to clean and moisten the mouth. Patients often benefit mouth care more often than the order of Q 4hours. Therefore the order suggests that if family wish to participate in care, that mouth care is something they can be taught.

# Additional Comfort Orders

**Comfort Care Additional**  
Please schedule medication if symptoms are continuous.

**Fever:**  
1 Acetaminophen tab 650mg po q 4hr prn  
2 Acetaminophen supp 650mg pr q 4hr prn

**Insomnia:**  
3 Trazodone 25mg po qhs prn

**Dry eyes:**  
4 Methylcellulose 0.4% oph sol 2 gtts each eye q6hr  
5 Lacri Lube oph oint thin ribbon of Lacri Lube both eyes 6qhr

**Sore mouth:**  
6 Mylanta benedryl lidocaine visc susp 30cc po ac prn  
7 Cetylpyridinium mouthwash 1 rinse of 0.05% topical qid prn

**Thrush:**  
8 Nystatin 100000UT/ml 5ml po qid x 7d

**Sore throat:**  
9 Phenol spray 1.4% 2puffs of 1.4% qid

**Cough:**  
10 Guaifenesin 100mg/5ml po q6hr

**Hiccoughs:**  
11 Baclofen 10mg po tid prn  
12 Chlorpromazine 25mg po q6hr prn

**Dyspepsia:**  
13 Maalox plus extr str 30ml po q6hr prn  
14 Ranitidine 150mg po bid  
15 Omeprazole 20mg po qd

**Diarhea:**  
Call MD for Lomotil & C.Diff orders.  
16 Pepto Bismol 262mg qid prn

**Dysuria:**  
17 Phenazopyridine 100mg po tid x 2d

## Additional Comfort Medications

When the CCOS was first developed this section was not available. However, it became clear that many of the orders in the CCOS were good options for patients who were actively dying, as well as patients earlier in their hospital or nursing home (community living center) stay. Therefore, this menu option was created to remind providers of other medications that might be helpful and to save them the time of having to enter the orders through the pharmacy menu.

# Demonstration of Menu

Comfort Care Additional Comfort Orders

Please schedule medication if symptoms are continuous.

**Fever:**

- 1 Acetaminophen tab 650mg po q 4hr prn
- 2 Acetaminophen supp 650mg pr q 4hr

**Insomnia:**

- 3 **Trazodone 25mg po qhs prn**

**Dry eyes:**

- 4 Methylcellulose 0.4% oph sol 2 gits e
- 5 Lacti Lube oph oint thin ribbon of Lac

**Sore mouth:**

- 6 Mylanla benedyl lidocaine visc susp
- 7 Cetylpyridinium mouthwash 1 rinse of

**Thrush:**

- 8 Nystatin 100000UT/ml 5ml po qid x 7d

**Sore throat:**

- 9 Phenol spray 1.4% 2puffs of 1.4% qid

**Cough:**

- 10 Guaifenesin 100mg/5ml po q6hr

**Hiccoughs:**

- 11 Baclofen 10mg po tid prn
- 12 Chlorpromazine 25mg po q6hr prn

**Dyspepsia:**

- 13 Maalox plus extr str 30ml po q6hr prn
- 14 Ranitidine 150mg po bid
- 15 Omeprazole 20mg po qd

**Diarhea:**

Call MD for Lomotil & C.Diff orders.

- 16 Pepto Bismol 262mg qid prn

**Dysuria:**

- 17 Phenazopyridine 100mg po tid x 2d

Medication Order

traZODONE TAB

| Dosage | Complex | Route    | Schedule (Day-Of-Week) |
|--------|---------|----------|------------------------|
| 25MG   |         | ORAL     | QHS PRN                |
| 25MG   | 0.02865 | ORAL     | Q5MIN                  |
| 50MG   | 0.0593  | NG TUBE  | Q6HR                   |
| 75MG   | 0.08895 | G TUBE   | Q72HR                  |
| 100MG  | 0.0861  | J TUBE   | Q8HR                   |
| 150MG  | 0.12915 | PEG TUBE | Q96H                   |
| 200MG  | 0.1722  |          | QAM                    |
|        |         |          | QAM (ANTI-DIABETIC)    |
|        |         |          | QAM&QPM                |
|        |         |          | QHS                    |
|        |         |          | QHS PRN                |
|        |         |          | QID                    |
|        |         |          | QID SS                 |

Comments: PRN INSOMNIA, MAY REPEAT IN 1HR

Give additional dose now

Priority: ROUTINE

Enter exact dose/freq; no range orders permitted

traZODONE TAB  
25MG PO QHS PRN PRN INSOMNIA, MAY REPEAT IN 1HR

Accept Order  
Quit

## Menu Option Demonstrated

All of these options are open to a default setting of the lower dose and most common route and frequency. These options can be accepted or the order can be customized easily by the clinician.

## Additional Comfort Orders

| Comfort Care Additional Comfo                                 |                                                              |
|---------------------------------------------------------------|--------------------------------------------------------------|
| <b>Please schedule medication if symptoms are continuous.</b> |                                                              |
| <b>Fever:</b>                                                 |                                                              |
| 1                                                             | Acetaminophen tab 650mg po q 4hr prn                         |
| 2                                                             | Acetaminophen supp 650mg pr q 4hr prn                        |
| <b>Insomnia:</b>                                              |                                                              |
| 3                                                             | Trazodone 25mg po qhs prn                                    |
| <b>Dry eyes:</b>                                              |                                                              |
| 4                                                             | Methylcellulose 0.4% oph sol 2 gtts each eye q6hr            |
| 5                                                             | Lacri Lube oph oint thin ribbon of Lacri Lube both eyes 6qhr |
| <b>Sore mouth:</b>                                            |                                                              |
| 6                                                             | Mylanta benedryl lidocaine visc susp 30cc po ac prn          |
| 7                                                             | Cetylpyridinium mouthwash 1 rinse of 0.05% topical qid prn   |
| <b>Thrush:</b>                                                |                                                              |
| 8                                                             | Nystatin 1000000UT/ml 5ml po qid x 7d                        |
| <b>Sore throat:</b>                                           |                                                              |
| 9                                                             | Phenol spray 1.4% 2puffs of 1.4% qid                         |

### Additional Comfort Medications:

#### Fever

- 1) Tylenol PO
- 2) Tylenol PR

#### Insomnia

- 3) Trazodone 25mg q HS PRN

#### Dry Eyes

- 4) HYPROMELLOSE 0.4% W/BAK OPHTH SOLN,OPH 2 drops q 6 hours
- 5) Lacri Lube Ointment to eyes q 6hours

#### Sore Mouth

- 6) MYLANTA/BENADRYL/XYLOCAINE VISC SUSP,ORAL q AC PRN
- 7) CETYLPYRIDINIUM MOUTHWASH PRN MOUTH PAIN, SWISH AND SWALLOW

#### Thrush

- 8) NYSTATIN ORAL TAB,ORAL 1000000UNT PO QID SWISH AND SWALLOW

#### Sore Throat

- 9) PHENOL SPRAY,ORAL QID PRN PRN DYSPHAGIA

## Additional Comfort Orders

### **Cough:**

10 Guaifenesin 100mg/5ml po q6hr

### **Hiccoughs:**

11 Baclofen 10mg po tid prn

12 Chlorpromazine 25mg po q6hr prn

### **Dyspepsia:**

13 Maalox plus extr str 30ml po q6hr prn

14 Ranitidine 150mg po bid

15 Omeprazole 20mg po qd

### **Diarrhea:**

Call MD for Lomotil & C.Diff orders.

16 Pepto Bismol 262mg qid prn

### **Dysuria:**

17 Phenazopyridine 100mg po tid x 2d

### Additional Comfort Medications (Continued)

#### Cough

10) Guaifenesin 5ml q 6 hours PRN

#### Hiccoughs

11) Baclofen 10mg PO TID PRN

12) Chlorpromazine 25mg PO q 6 hours PRN

#### Dyspepsia

13) Maalox plus 30ml PO q 6 hours PRN

14) Ranitidine 150 mg PO BID

15) Omeprazole 20mg PO daily

#### Diarrhea

Call MD for and Clostridium Difficile orders

16) Pepto Bismol 262 mg q 6 hours PRN

#### Dysuria

17) PHENAZOPYRIDINE HCL TAB 100MG PO TID

## Consider Consults

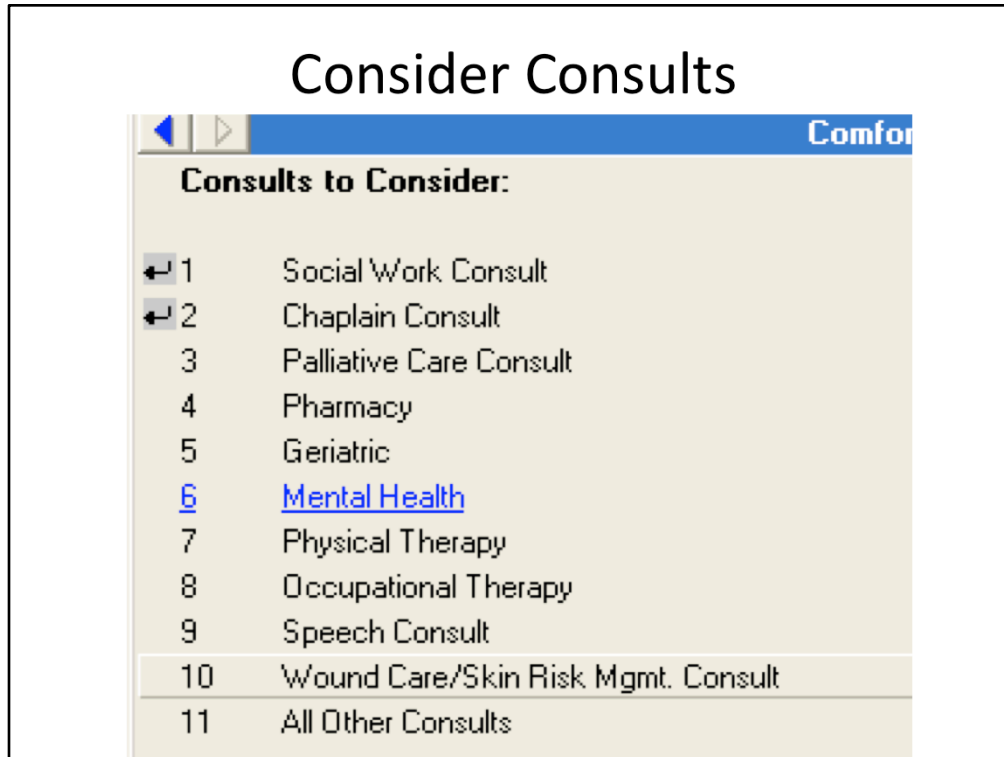

### Consider Consults

Hospice and Palliative Care patients are best served by an interdisciplinary team approach. Typically, they have multiple needs, making it prudent to consult one or more supporting services.

One of the consult options is "Palliative Care." Because any clinician may encounter patients at end of life, they may wish to consider using the CCOS. They may use the CCOS to begin palliation of symptoms immediately and place a consult to the Palliative Care Consult Team to assist, refine, or potentially transfer the patient if it is appropriate.

## Example of Consult Open

**Order a Consult**

Consult to Service/Specialty  
 MENTAL HEALTH - INPATIENT PSYCHIATRY  
 MENTAL HEALTH - INPATIENT PSYCHIATRY

Urgency: ROUTINE  
 Attention: [ ]  
 Patient will be seen as an:  
 Inpatient  Outpatient  
 Place of Consultation: BEDSIDE  
 Provisional Diagnosis: [ ] Lexicon

Reason for Request

```

SERVICE CONNECTED % - NONE FOUND
=====
RATED DISABILITIES - NONE FOUND
=====
Enrollment Priority: GROUP 5 / Combat Veteran Status: None Indicated
=====
  
```

MENTAL HEALTH - INPATIENT PSYCHIATRY Cons BEDSIDE

Accept Order Quit

When a consult is selected, the clinician is prompted to fill out the consult form with additional information that service may need to respond appropriately.

After placing all of the needed consults, the CCOS is complete. Additional orders such as for laboratory studies, radiology studies, other medications, or any other needs can be placed using the usual order tabs in the system.

# Comfort Care Order Set BEACON PROJECT



---

Birmingham VA





# Comfort Care Order Sets

---

- Helpful guide to care for Veterans in the hospital who have severe and life limiting illness to improve
  - Allows the physicians to order admission, transfer to new unit in hospital or start order set in less than 10 minutes
  - Comprehensive so fewer calls for new prn medications or cross cover issues
  - Symptom control of pain and other symptoms
  - Improve patient and family satisfaction



# Comfort Care Order Set

---

- Safe and Easy to use orders for pain medications, medications for delirium and agitation and other symptoms
- Prewritten nursing text orders for comfort measures that you don't have to type in.
- By using the entire order set less likely to forget to place an order that results in call back, cross cover issues or poor symptom control.



# Comfort Care Order Set

| Comfort Care Order Menu         |                                                                 | Done |
|---------------------------------|-----------------------------------------------------------------|------|
| <b>Comfort Care Orders Menu</b> |                                                                 |      |
| 1                               | Admit and initiate Comfort Care Order Set                       |      |
| 2                               | Transfer and initiate Comfort Care Order Set                    |      |
| 3                               | DNI DNR                                                         |      |
| 4                               | Diet Orders                                                     |      |
| 5                               | Nursing                                                         |      |
| 6                               | Vital Signs                                                     |      |
| 7                               | Activity Orders                                                 |      |
| 8                               | IV Considerations                                               |      |
| 9                               | Respiratory Orders                                              |      |
| 10                              | Pain & Dyspnea (Opioids)                                        |      |
| 11                              | Nausea & Delirium (Phenothines)                                 |      |
| 12                              | Anxiety and Seizure (Benzodiazepines)                           |      |
| 13                              | Pain Dyspnea Anorexia Asthenia and Depression (Corticosteroids) |      |
| 14                              | Constipation                                                    |      |
| 15                              | Death Rattle Orders                                             |      |
| 16                              | Additional Comfort Medications                                  |      |
| 17                              | Consults                                                        |      |

# Designation of Resuscitation Status

**DNR Orders** Next

**Per Policy Resident DNR/DNI order active X 24hr after discussing with Attending**

- DNI X 24 HOURS (RESIDENT ORDER)
- DNI ATTENDING ORDER
- DNR X 24 HRS (RESIDENT ORDER)
- DNR ATTENDING ORDER
- REMOVE DNI (REMOVES DNI POSTING FROM COVER SHEET)
- REMOVE DNR (REMOVES DNR POSTING FROM COVER SHEET)

**Patient Care Order** ✕

Patient Care

DNR

Instructions

DO NOT ATTEMPT RESUSCITATION

Start Date/Time      Stop Date/Time

NOW      ...      ...

DNR  
DO NOT ATTEMPT RESUSCITATION

Accept Order

Quit



# Full Liquid Diet instead of NPO

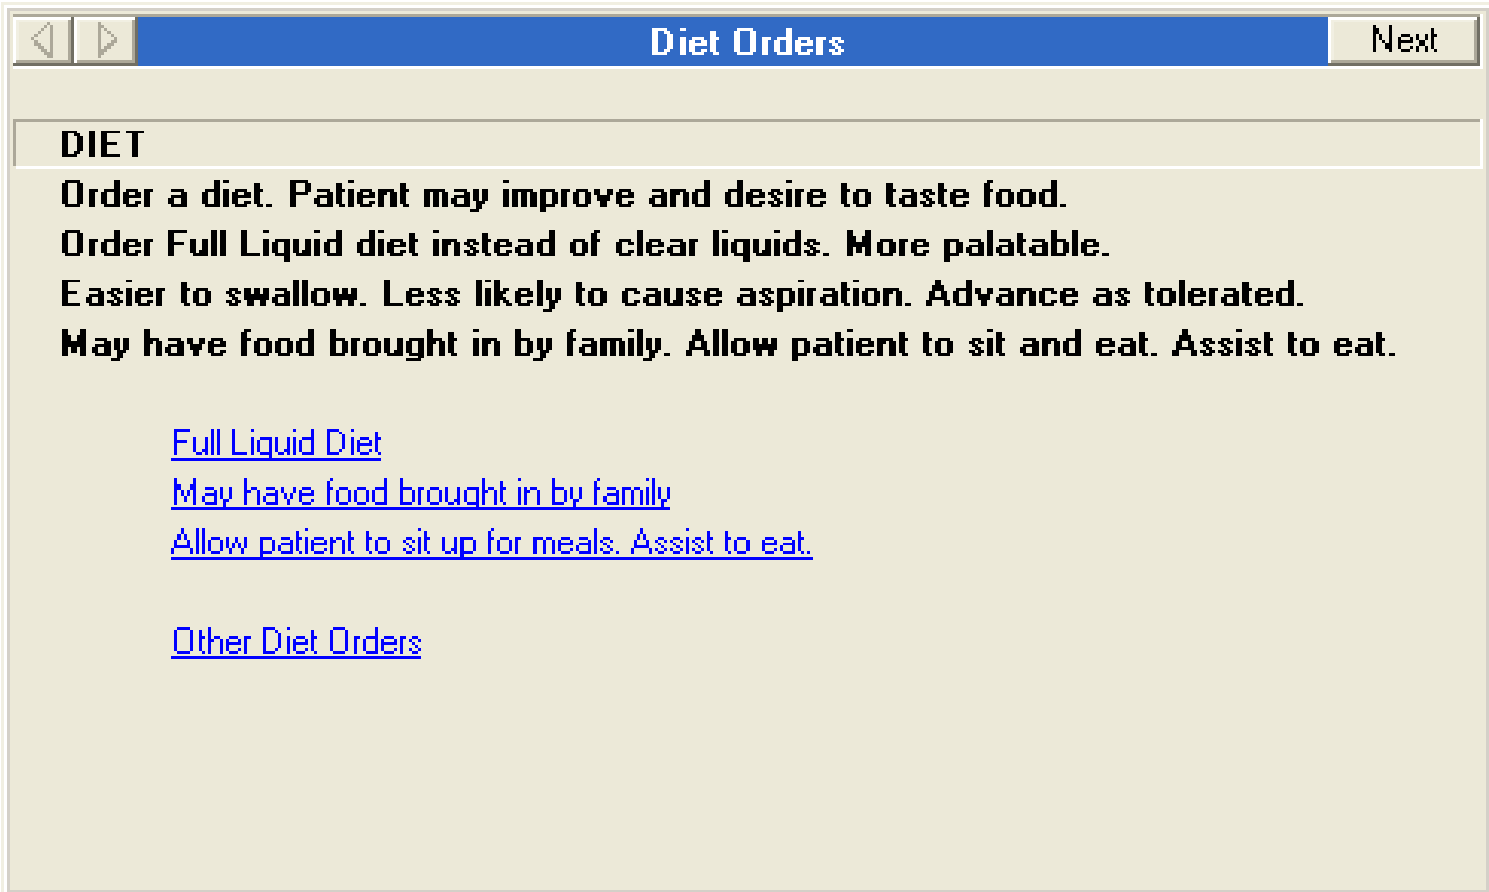

**DIET**

**Order a diet. Patient may improve and desire to taste food.**

**Order Full Liquid diet instead of clear liquids. More palatable.**

**Easier to swallow. Less likely to cause aspiration. Advance as tolerated.**

**May have food brought in by family. Allow patient to sit and eat. Assist to eat.**

[Full Liquid Diet](#)

[May have food brought in by family](#)

[Allow patient to sit up for meals. Assist to eat.](#)

[Other Diet Orders](#)

# Nursing Orders

Comfort Care Nursing Orders Done

**NURSING:**

**TIPS FOR COMFORT/SAFETY:**  
**Comforting measures. Reposition. Massage. Speak to patient.**  
**Soft music. Avoid sensory overload (TV).**

- 1 Please weigh on admission to Safe Harbor and weekly on Mondays thereafter
- 2 For CHF please weigh daily
- 3 May discontinue lab tests and daily wts and SCD's and subq Heparin and discontinue telemetry
- 4 RN may change form of medicine and route of administration. No IM meds
- 5 Keep hearing aid and dentures and glasses on pt.
- 6 Audiology consult:obtain amplifier for HOH patient
- 7 If actively dying please turn only for comfort
- 8 Please designate the patient HOSPICE FOR ACUTE CARE

**ACTIVITY: AVOID RESTRAINTS. Patient may need one on one sitter.**

**Begin environment modifications:**

- 9 OOB to chair BID and preferably outside
- 10 Open curtain during day.
- 11 Decrease unnecessary noise (turn off TV)
- 12 Redirect ~ Reposition ~ Speak quietly
- 13 Provide nightlight when sleeping.
- 14 Please allow family to stay with patient in room

**ASSISTING FAMILY:**  
**Advise family about alerting their family members as to gravity of pt status. Arrange family visits of military relatives by contacting Red Cross and of incarcerated relatives by contacting warden. SW may assist.**

- 15 Please give family "Preparing For Your Loved One's Loss"



# Vital Signs

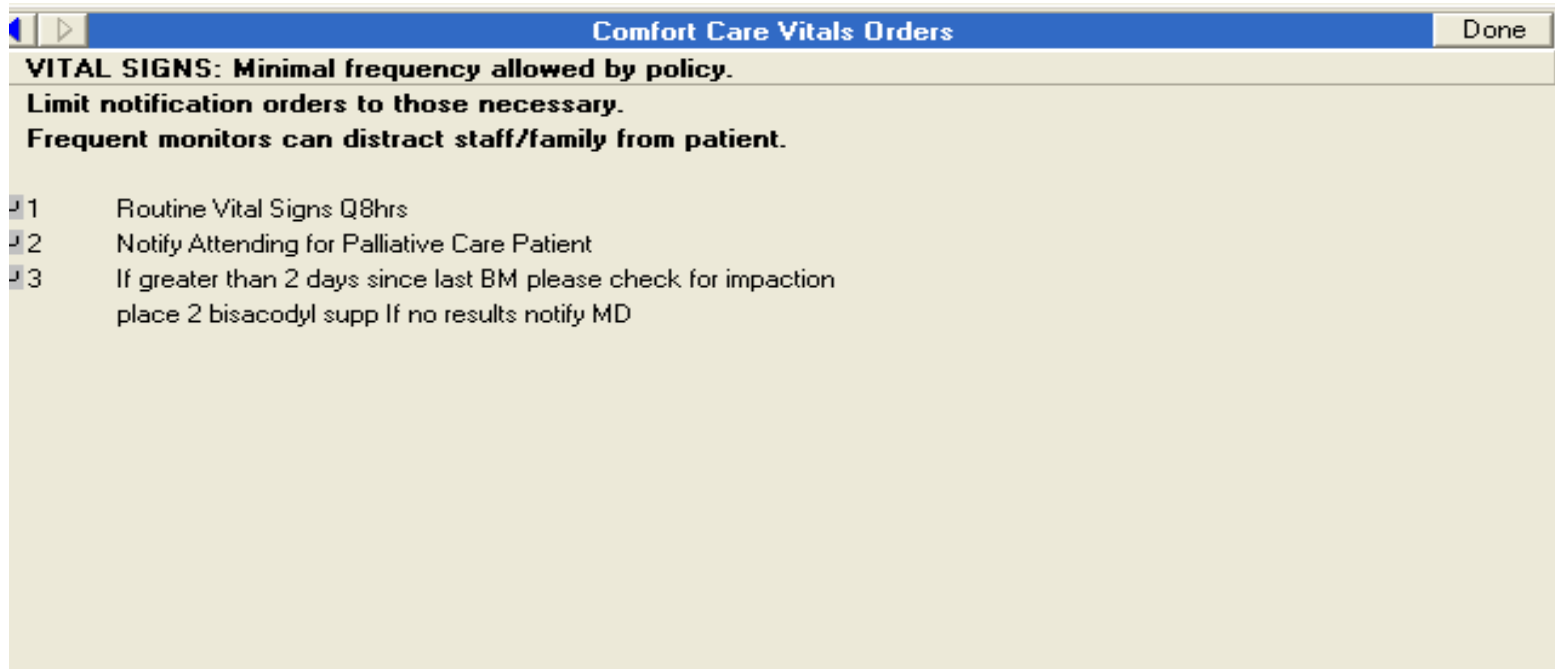

**Comfort Care Vitals Orders** Done

**VITAL SIGNS: Minimal frequency allowed by policy.**

**Limit notification orders to those necessary.**

**Frequent monitors can distract staff/family from patient.**

- 1 Routine Vital Signs Q8hrs
- 2 Notify Attending for Palliative Care Patient
- 3 If greater than 2 days since last BM please check for impaction  
place 2 bisacodyl supp If no results notify MD

# Suggested Notifications

**Notify** [Close]

Respiratory Status:

Agitation:

Pain:

Family Present:

Special Instructions:

Start date:  ...

Stop date:  ...

Notify MD if:

- Labored breathing not relieved with medication
- Agitation/Delirium not relieved with medication
- Pain not controlled with medication
- Family present and need to speak with physician

Navigation: [Up] [List] [Down]

Buttons: [Accept Order] [Quit]



# SQ Lines, IV and Fluids

IV Considerations Next

**IV Placement often difficult & painful without patient benefit**  
**Presence of edema indicates that patient is not dehydrated**  
**Many patients have fluid overload edema and pulmonary congestion**  
**If IV fluids used suggest limited time trial of D5 1/2NS 1000 ml over 6 hours**  
**Suggest oral hydration as a reasonable compromise or**

---

[D5 1/2NS 1000cc IV over 6 hours](#)  
Other IV Fluid Orders

**Subcutaneous Line: Small IV (22 gauge) needle inserted directly under skin (often on the abdomen or thigh) Avoids burden of finding/maintaining IV access. For injecting small volumes of many medicines when oral route unavailable**

Subcutaneous (SQ) Line

**Hypodermoclysis (subcutaneous infusion)**

D5 1/2NS 1000cc SQ over 24 hours

# Subcutaneous Line Placement

**Subcutaneous (SQ) Line**

Order:

Special Instructions:

Start Date:  ...

Stop Date:  ...

Start Date: Now  
Stop Date: T+21

Accept Order

Quit



# Oxygen and Respiratory Therapy

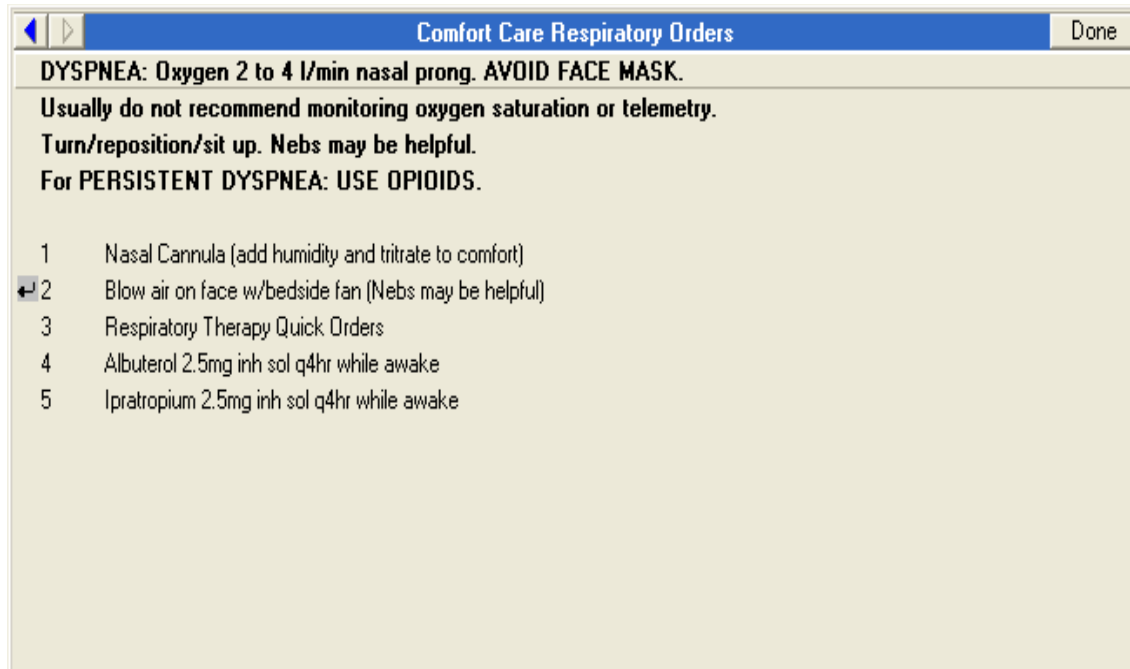

**Comfort Care Respiratory Orders** Done

**DYSPNEA: Oxygen 2 to 4 l/min nasal prong. AVOID FACE MASK.**

Usually do not recommend monitoring oxygen saturation or telemetry.

Turn/reposition/sit up. Nebi may be helpful.

For PERSISTENT DYSPNEA: USE OPIOIDS.

- 1 Nasal Cannula (add humidity and tritrate to comfort)
- 2 Blow air on face w/bedside fan (Nebi may be helpful)
- 3 Respiratory Therapy Quick Orders
- 4 Albuterol 2.5mg inh sol q4hr while awake
- 5 Ipratropium 2.5mg inh sol q4hr while awake

# Oxygen Nasal Cannula Default

**Nasal Oxygen**

Order:

Special Instructions:

Special Instructions:

Start Date:

Stop Date:

NASAL OXYGEN 2-4L/M - Nasal Cannula  
For patient comfort avoid face mask  
Comfort Care Order  
Start Date: Now  
Stop Date: T+7

Accept Order

Quit

# Bed Side Fan for Air Flow

The screenshot shows a software window titled "Fan for patient room" with a blue title bar and a close button in the top right corner. The main area contains the following fields:

- Special Instructions:
- Order Start:  ...
- Order Stop:  ...

At the bottom of the window, there is a summary section with a scroll bar on the right and two buttons:

Blow air on face with bedside Fan  
Comfort Care Order  
Order Start: N  
Order Stop: T+21

Buttons:  and

# Most Patients at Life's End have Pain or Dyspnea and Need an Opioid

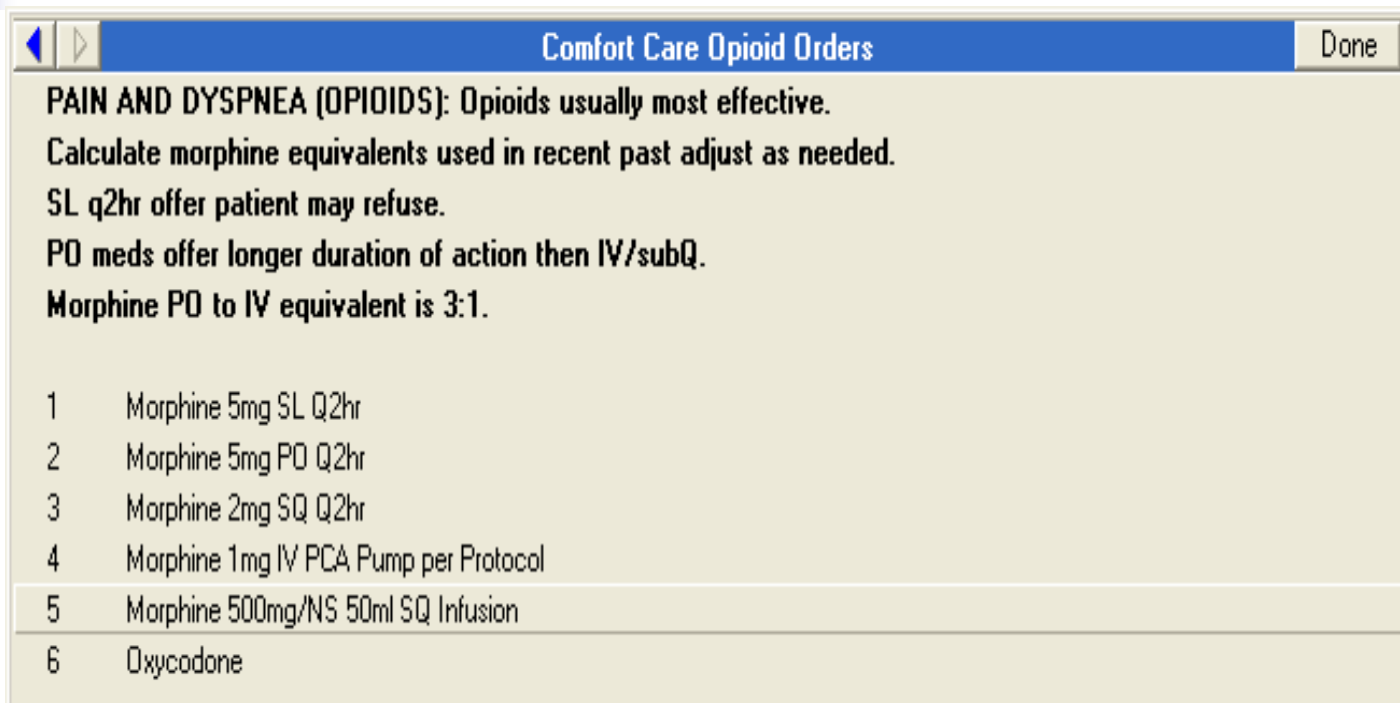

**Comfort Care Opioid Orders** Done

**PAIN AND DYSPNEA (OPIOIDS):** Opioids usually most effective.  
Calculate morphine equivalents used in recent past adjust as needed.  
SL q2hr offer patient may refuse.  
PO meds offer longer duration of action then IV/subQ.  
**Morphine PO to IV equivalent is 3:1.**

- 1 Morphine 5mg SL Q2hr
- 2 Morphine 5mg PO Q2hr
- 3 Morphine 2mg SQ Q2hr
- 4 Morphine 1mg IV PCA Pump per Protocol
- 5 Morphine 500mg/NS 50ml SQ Infusion
- 6 Oxycodone

# Oral Morphine Solution

## Example of Offer/ May Refuse

**Medication Order** [X]

MORPHINE SULFATE CONCENTRATED SOLN,CONC [Change]

**\*\* CONCENTRATED \*\***

| Dosage     | Complex  | Route        | Schedule (Day-Of-Week) | PRN                      |
|------------|----------|--------------|------------------------|--------------------------|
| 5MG/0.25ML |          | SUBLINGUAL   | Q2HR                   | <input type="checkbox"/> |
| 5MG/0.25ML | 0.030075 | NG TUBE/ORAL | PC                     | <input type="checkbox"/> |
| 10MG/0.5ML | 0.06015  | TOPICAL      | PC&HS                  | <input type="checkbox"/> |
| 20MG/1ML   | 0.1203   | ORAL         | Q MONTH                | <input type="checkbox"/> |
| 30MG/1.5ML | 0.18045  | SUBLINGUAL   | Q10MIN                 | <input type="checkbox"/> |
| 40MG/2ML   | 0.2406   |              | Q12HR                  | <input type="checkbox"/> |
|            |          |              | Q15MIN                 | <input type="checkbox"/> |
|            |          |              | Q18H                   | <input type="checkbox"/> |
|            |          |              | Q1HR                   | <input type="checkbox"/> |
|            |          |              | Q24HR                  | <input type="checkbox"/> |
|            |          |              | Q2HR                   | <input type="checkbox"/> |
|            |          |              | Q-2WEEKS               | <input type="checkbox"/> |
|            |          |              | Q30 MINS               | <input type="checkbox"/> |
|            |          |              | Q3D                    | <input type="checkbox"/> |
|            |          |              | Q3HR                   | <input type="checkbox"/> |
|            |          |              | Q-3WEEKS               | <input type="checkbox"/> |
|            |          |              | Q48HR                  | <input type="checkbox"/> |
|            |          |              | Q4HR                   | <input type="checkbox"/> |

Comments: Offer-patient may refuse; for pain or dyspnea or RR >20.

Give additional dose now

Admin Time: 0200-0400-0600-0800-1000-1200-1400-1600-1800-2000-2200-2400

Expected First Dose: TODAY (Aug 07, 10) at 14:00

Enter exact dose/freq; no range orders permitted

MORPHINE SULFATE CONCENTRATED SOLN,CONC  
5MG/0.25ML SL Q2HR Offer-patient may refuse; for pain or dyspnea or RR >20.

Accept Order [Quit]

# Patient May Need Parenteral Medication if Problem Swallowing

**Medication Order** [X]

MORPHINE INJ [Change]

**If for PRN use enter an Indication for Use in the "Comments" field**

| Dosage / Rate | Complex | Route           | Schedule (Day-Of-Week) | PRN                      |
|---------------|---------|-----------------|------------------------|--------------------------|
| 2MG/0.5ML     |         | INTRAVENOUS     | Q2H                    | <input type="checkbox"/> |
| 1MG/0.25ML    | 0.173   | INTRAVENOUS     | PC&HS                  |                          |
| 2MG/0.5ML     | 0.346   | INTRAMUSCULAR   | PM                     |                          |
| 3MG/0.75ML    | 0.519   | IRRIGATION      | PRN                    |                          |
| 4MG/1ML       | 0.692   | SUBCUTANEOUS    | Q12H                   |                          |
| 5MG/0.5ML     | 0.3875  | INTRA-ARTICULAR | Q12H PRN               |                          |
| 6MG/0.6ML     | 0.465   |                 | Q18H                   |                          |
| 7MG/0.7ML     | 0.5425  |                 | Q1H                    |                          |
| 8MG/0.8ML     | 0.62    |                 | Q1H PRN                |                          |
| 10MG/1ML      | 0.775   |                 | Q24H                   |                          |
| 15MG/1ML      | 0.537   |                 | Q2H                    |                          |
| 15MG/1ML      | 5.51    |                 | Q2H PRN                |                          |
| 30MG/2ML      | 11.02   |                 | Q2WEEKS                |                          |
|               |         |                 | Q36H                   |                          |
|               |         |                 | Q3H                    |                          |
|               |         |                 | Q3H PRN                |                          |
|               |         |                 | Q3MIN PRN              |                          |
|               |         |                 | Q3-MINX3 PRN/CP        |                          |
|               |         |                 | Q3WEEKS                |                          |
|               |         |                 | Q48H                   |                          |
|               |         |                 | Q4H                    |                          |
|               |         |                 | Q4H PRN                |                          |
|               |         |                 | Q4WEEKS                |                          |
|               |         |                 | Q5MIN PRN              |                          |
|               |         |                 | Q6H                    |                          |

Comments: Comfort Care Order: Offer - Patient may refuse: for pain or dyspnea or RR>20.

Give additional dose now

Admin Time: 01-03-05-07-09-11-13-15-17-19-21-23

Expected First Dose: TODAY (Oct 14, 09) at 13:00

Priority: ROUTINE

MORPHINE INJ  
2MG/0.5ML IV Q2H Comfort Care Order: Offer - Patient may refuse: for pain or dyspnea or RR>20.

Accept Order [X] Quit



# Different Routes and Doses Depending on Age and Patient

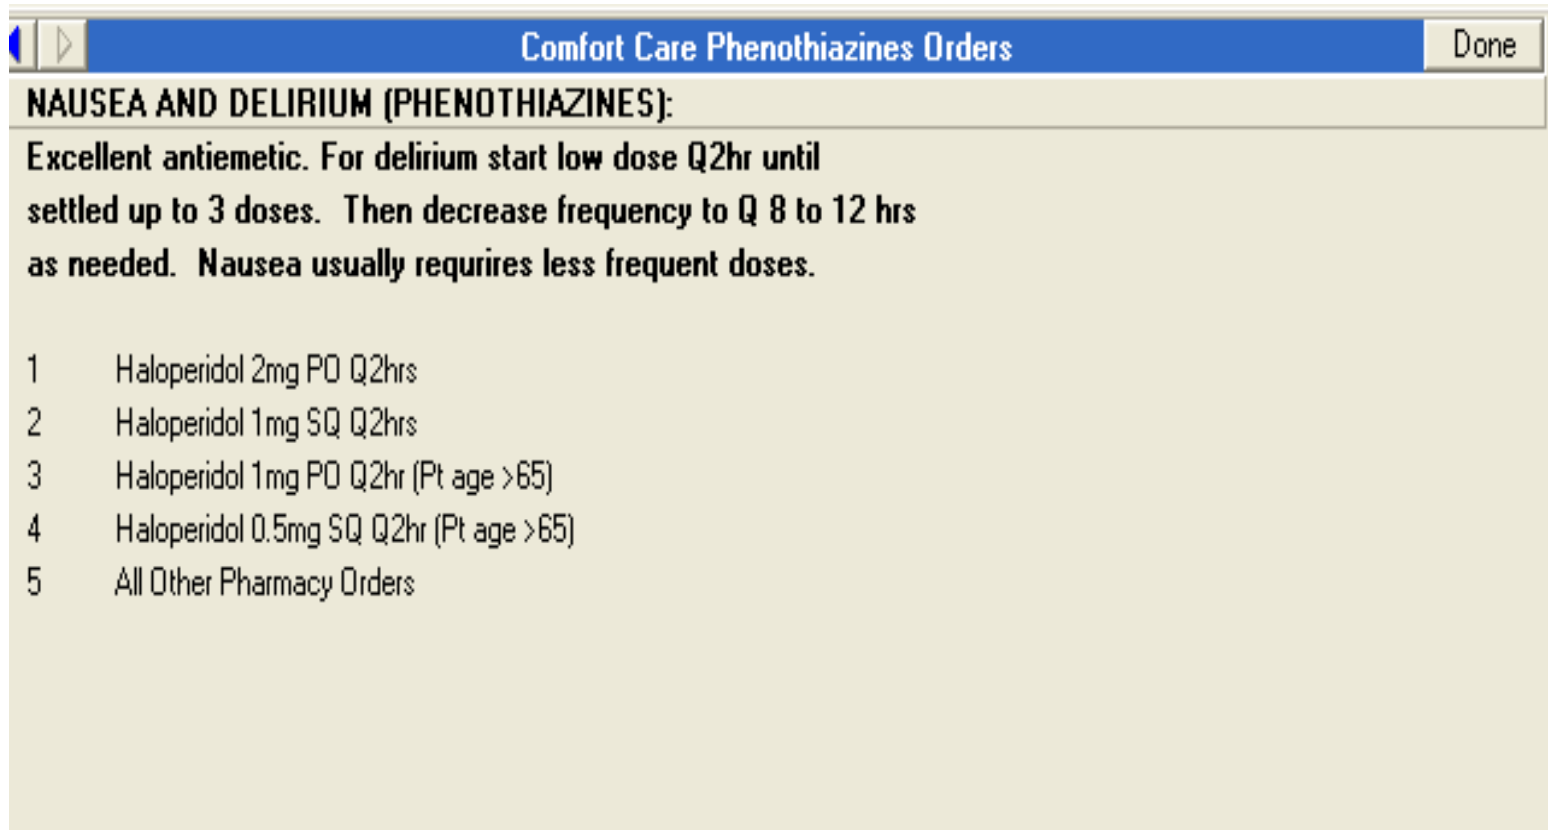

**Comfort Care Phenothiazines Orders** Done

**NAUSEA AND DELIRIUM (PHENOTHIAZINES):**

Excellent antiemetic. For delirium start low dose Q2hr until settled up to 3 doses. Then decrease frequency to Q 8 to 12 hrs as needed. Nausea usually requires less frequent doses.

- 1 Haloperidol 2mg PO Q2hrs
- 2 Haloperidol 1mg SQ Q2hrs
- 3 Haloperidol 1mg PO Q2hr (Pt age >65)
- 4 Haloperidol 0.5mg SQ Q2hr (Pt age >65)
- 5 All Other Pharmacy Orders

# Haloperidol is helpful for: Delirium and Nausea/Vomiting

**Medication Order** [Close]

HALOPERIDOL INJ.SOLN [Change]

**If for PRN use enter an Indication for Use in the "Comments" field** [Insert Row] [Remove Row]  
(Day-Of-Week)

| Dosage    | Complex | Route    | Schedule | Duration (opt) | Admin. Times      | then/and |
|-----------|---------|----------|----------|----------------|-------------------|----------|
| 1MG/0.2ML |         | INTRAVEN | Q2H      | 6 HOURS        | 01-03-05-07-09-11 | THEN     |
| 1MG/0.2ML |         | INTRAVEN | Q6H PRN  |                |                   |          |

Comments: Up to 3 doses total or until settled then Q6H PRN for nausea/delirium. Not to exceed 3 doses (3mg) in 24 hours without notifying provider (Comfort Care Order)

Give additional dose now

Priority: ROUTINE

Expected First Dose: TODAY (Oct 14, 09) at 13:00

HALOPERIDOL INJ.SOLN  
1MG/0.2ML IV Q2H FOR 6 HOURS THEN 1MG/0.2ML IV Q6H PRN Up to 3 doses total or until settled then Q6H PRN for

[Accept Order] [Quit]

# Lorazepam for Anxiety and Seizure

## Note Different Routes/Doses for Ages

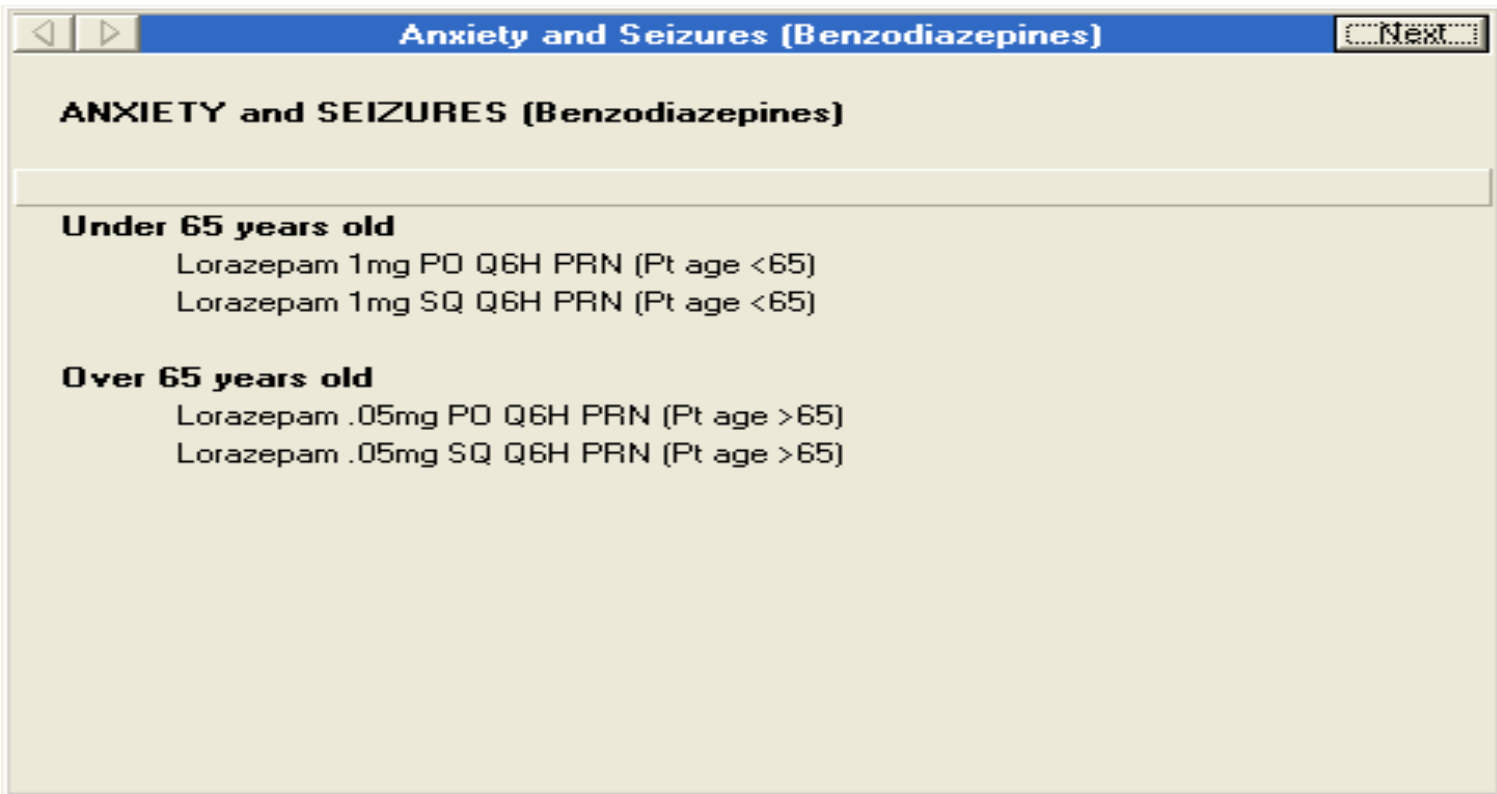

The screenshot shows a window titled "Anxiety and Seizures (Benzodiazepines)" with a "Next" button in the top right corner. The main content area is titled "ANXIETY and SEIZURES (Benzodiazepines)" and is divided into two sections: "Under 65 years old" and "Over 65 years old".

**Under 65 years old**

- Lorazepam 1mg PO Q6H PRN (Pt age <65)
- Lorazepam 1mg SQ Q6H PRN (Pt age <65)

**Over 65 years old**

- Lorazepam .05mg PO Q6H PRN (Pt age >65)
- Lorazepam .05mg SQ Q6H PRN (Pt age >65)

# Lorazepam orders

## SQ; PRN; Delirium Warning

**Medication Order** [X]

LORAZEPAM INJ [Change]

**Display Restrictions/Guidelines**

| Dosage       | Complex | Route           | Schedule (Day-Of-Week)               |
|--------------|---------|-----------------|--------------------------------------|
| 1MG/0.5ML    |         | INTRAVENOUS     | Q6H PRN <input type="checkbox"/> PRN |
| 0.5MG/0.25ML | 0.39825 | INTRAMUSCULAR   | Q3MIN PRN                            |
| 1MG/0.5ML    | 0.7965  | INTRAVENOUS     | Q3-MINX3 PRN/CP                      |
| 2MG/0.5ML    | 1.1795  | IRRIGATION      | Q3WEEKS                              |
| 4MG/1ML      | 2.359   | SUBCUTANEOUS    | Q48H                                 |
|              |         | INTRA-ARTICULAR | Q4H                                  |
|              |         |                 | Q4H PRN                              |
|              |         |                 | Q4WEEKS                              |
|              |         |                 | Q5MIN PRN                            |
|              |         |                 | Q6H                                  |
|              |         |                 | <b>Q6H PRN</b>                       |
|              |         |                 | Q72H                                 |
|              |         |                 | Q8H                                  |
|              |         |                 | Q8H PRN                              |
|              |         |                 | Q96H                                 |
|              |         |                 | QAM                                  |
|              |         |                 | QAM INSULIN                          |
|              |         |                 | QHS                                  |
|              |         |                 | QHS PRN                              |
|              |         |                 | QID                                  |
|              |         |                 | QID PRN                              |
|              |         |                 | QPM                                  |
|              |         |                 | QPM INSULIN                          |
|              |         |                 | RESP-BID                             |
|              |         |                 | RESP-Q6H                             |
|              |         |                 | RESP-Q6H PRN                         |
|              |         |                 | RESP-QID                             |

Comments: For anxiety or seizure (Comfort Care Order)  
Note: Delirium may be mistaken for anxiety. If delirium suspected, see Haloperidol orders.

Give additional dose now

Priority: ROUTINE

LORAZEPAM INJ  
1MG/0.5ML IV Q6H PRN For anxiety or seizure (Comfort Care Order)  
Note: Delirium may be mistaken for anxiety. If delirium suspected, see

Accept Order  
Quit

# Corticosteroids Often Help Multiple Symptoms

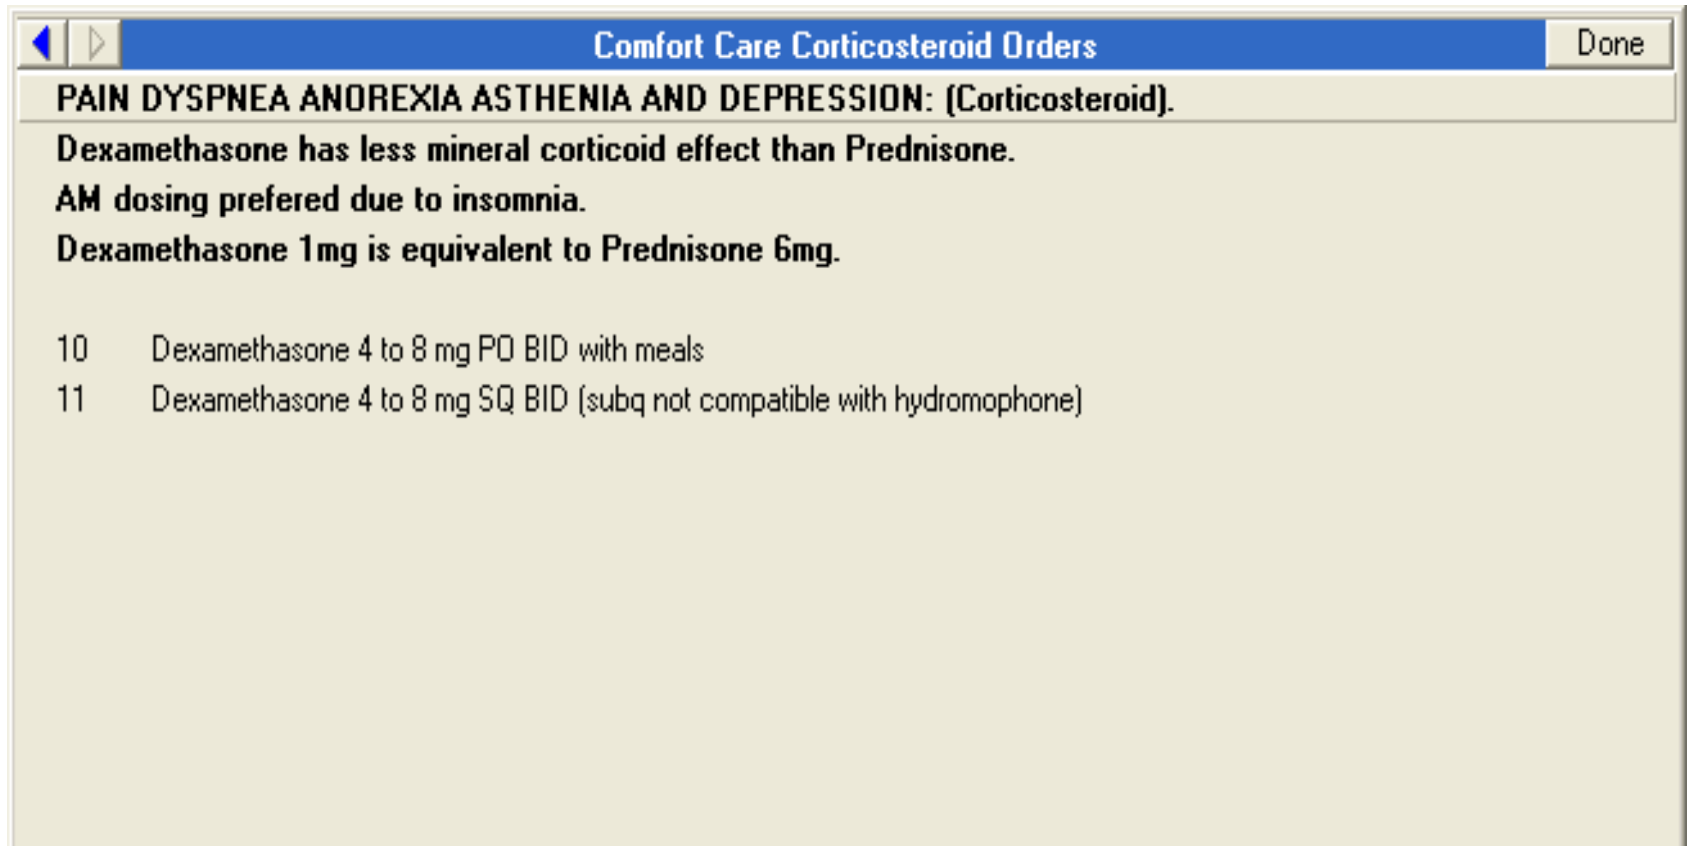

Comfort Care Corticosteroid Orders Done

**PAIN DYSPNEA ANOREXIA ASTHENIA AND DEPRESSION: (Corticosteroid).**

**Dexamethasone has less mineral corticoid effect than Prednisone.**

**AM dosing preferred due to insomnia.**

**Dexamethasone 1mg is equivalent to Prednisone 6mg.**

10 Dexamethasone 4 to 8 mg PO BID with meals

11 Dexamethasone 4 to 8 mg SQ BID (subq not compatible with hydromophone)

# For Death Rattle

Comfort Care Death Rattle Orders Done

**DEATH RATTLE: Keep back of throat dry by turning head to side.**

**Stop IVF or tube feeding.**

- 1 Scopolamine patch behind ear Q 3 days
- 2 Atropine drops in back of throat Q4hr PRN
- 3 Glycopyrrolate 0.2/ml IV Q6hr
- 4 Glycopyrrolate 0.2/ml SUBQ Q6hr
- ← 5 Yankauer suction to bedside. Avoid deep suctioning
- ← 6 Cleanse mouth with Spongettes Q4hrs. Instruct family how to use.

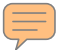

# Consider Consults

Comfort Care Consult Orders Done

**Consults to Consider:**

- 1 Social Work Consult
- 2 Chaplain Consult
- 3 Palliative Care Consult
- 4 Pharmacy
- 5 Geriatric
- 6 [Mental Health](#)
- 7 Physical Therapy
- 8 Occupational Therapy
- 9 Speech Consult
- 10 Wound Care/Skin Risk Mgmt. Consult
- 11 All Other Consults

# Preparing for Your Loved Ones Death

Death comes in its own way and time to each individual. It is a quiet and natural series of events to help the body release its spirit. Thank you for letting us share in the care of this special person during their transition time. When someone close to you is dying, it is normal to have questions about what to expect. Although sad and stressful, this can be a positive process for families to share. This booklet is designed to help you to understand what to expect at the end of life and what you can do. Please use it as a guide in addition to the support our nurses and other members of our team can offer. This information applies to patients with all types of terminal illnesses. But remember that each person is different and may not have every symptom. Our staff is available to explain the stages of dying and guide you through the experience. Please feel free to ask questions and share concerns.

## Winding Down

In the final stages of life there is a gradual withdrawal from people, activities, and food. Your loved one may only have enough energy to be with one or two people. He or she may be sleepier, wishing to stay in one place and nap more. This may be due to:

- Fatigue
- The disease process
- Depression
- Medications used to control pain or restlessness
- Insomnia

Just sitting quietly beside them can be comforting. A light touch and companionable silence can speak greatly of your concern and love.

## Comfort

You may wonder if the dying process will be painful. Pain, restlessness, or anxiety is possible. There are many ways to relieve pain.

Medications:

- Injections (shots)
- Medication in the vein (intravenously)
- Oral medications (by mouth)
- Suppositories
- Skin patches

Comfort measures:

- Heating pads -Changing positions
- Massage
- Special beds or mattresses - Extra pillows for support -Music
- Television
- Prayer

There may be times when your loved one will still have some pain, in spite of our attempts to relieve it. We will continue to try different combinations of methods to relieve as much pain as possible. Families are often concerned that if a patient can no longer speak we will not know they are in pain. Physical signs that may indicate pain include:

- Grimacing
- Clenched fists
- Restlessness
- Tense or rigid body
- Sweating
- Increase in breathing or heart beat - Moaning
- Insomnia

You can help by watching for these signs of pain and discussing them with your nurse.

## Nutrition

Aggressive nutritional support such as IVs or tube feedings may not benefit a person who is dying. Frequently there will be more than one body system failing, causing nutrients and fluids to produce distressing symptoms. The disease process can:

- Change the desire to eat and/or the ability to digest food.
- Leave the patient with no energy or interest in eating. Therefore, it can change a pleasant experience to a distressing one.
- It is not unusual for patients to have food cravings that change from one moment to the next. They may also eat well at one meal and have no appetite for the next. It is our philosophy to allow the patient's wishes in regard to eating.

1. Families are encouraged to bring favorite foods from home (a refrigerator is available for food storage).
2. Our patient's food preferences are more important than nutritional content.
3. It is normal for a patient very close to death to refuse food completely.  
Patients who are close to death do not feel hungry or thirsty. They are not starving. Nature is at work assisting them to die in a more comfortable way.

## Breathing

The patient's disease is one factor that can affect the breathing pattern. Cancer sometimes spreads to the area of the brain where the breathing control center is located. It can also affect other body systems, causing changes in breathing. The breathing pattern may become slower as well as irregular, or there may be pauses. Medication can cause slowing of breathing but this does not cause discomfort to the dying person. Breathing may become noisy and congested or labored with a rattling sound. Congestion may be caused by:

- The disease process
- Immobility
- Weakness
- Lowered resistance
- Infection



Medication, breathing treatments, oxygen, and other comfort measures such as repositioning can relieve symptoms. Suction is occasionally used but is not always helpful.

## *Communication*

Often people wonder if the person is able to hear even though they cannot respond. Hearing is believed to be the last of the senses to go. Even when they are in a coma or deep sleep, the patient may be able to recognize familiar voices and sounds. It is good to talk to them - the sound of a familiar voice may be comforting - feel free to say whatever is in your heart.

Sometimes the dying person may need to hear you say you love them, but it is okay to leave when he or she is ready. If tears come, they are natural and a special way to say goodbye.

Touching is important. It is soothing and communicates feelings of security and love. There may be times that touching could increase pain and anxiety. During these times, just your being there may make the patient feel secure. Let the patient's reaction to touch guide you.

Spiritual and family issues may arise at this time. Our chaplains are available for spiritual care and support. Our social worker may be able to help with family and legal issues.

## *When Death is Near*

Knowing exactly when a person will die is difficult to determine. But in many cases there are obvious signs of approaching death. These signs include:

- Changes in breathing
- Longer pauses between breaths
- Bluish color to lips, nail beds, legs
- Cool skin
- Restlessness, confusion, or speaking to unseen persons
- Muscle twitching in hands, feet, arms, and legs
- Loss of bowel or bladder control and/or decrease in the amount of urine
- Weak pulse that is difficult to detect

There are no limitations on visiting hours. If you wish to spend the night we will provide sleeping cots, blankets etc. A family lounge is available for your respite. Make coffee, which is provided, and use the refrigerator to store snacks or other supplies.

Every effort will be made to notify you when death is near. If for any reason family or friends are unable to be there, staff members will try to be at the bedside while the patient is dying. Again, every effort will be made to notify you of impending death so that you may choose to be there if you wish.

## *The Time After Death*

You may spend as much time as you need with your loved one. Friends and family may also be present. If you need help making phone calls, we are available. The nursing staff will help you to complete any final paperwork. The person who is the Next of Kin will be needed to supply this information, either in person or by telephone.

Thank you for letting us share in the care of this special person during their transition time.



# *Preparing for Your Loved One's Death*

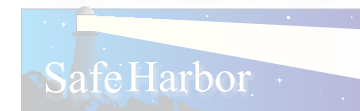

**BIRMINGHAM VA MEDICAL CENTER**  
700 SOUTH 19th STREET BIRMINGHAM AL 35233

The Birmingham VA Medical Center wishes to thank the Clement Zabloci VA Medical Center in Milwaukee, Wisconsin for use of the material contained in this document

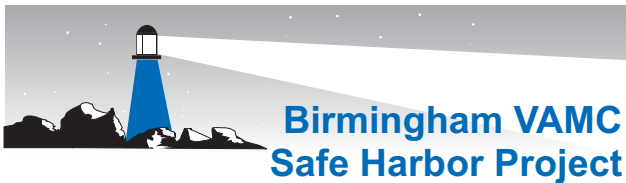

Consider Palliative Care when patients are admitted to the hospital. This is an important aspect of care because...

Palliative Care can often assist in improving symptom control for people with pain or other physical symptoms.

The Palliative Care Team approach can assist you in relieving the emotional, social, and spiritual suffering patients may experience.

Palliative Care can help you determine the eligibility of patients for supportive care services such as Palliative Care Clinic, Home Health and Home Hospice which may provide needed assistance with home services, medications and nurse case management.

Palliative Care can help facilitate patient and family conferences to define goals of care including Advanced Directives.

### Consider a Palliative Care Consult in patients with...

(Any one or more signs/symptoms)

#### Cancer

- Any patient with metastatic or inoperable Cancer

#### Heart Disease

- CHF symptoms at rest
- EF of <20%
- New dysrhythmia
- Cardiac Arrest, syncope or CVA
- Frequent ER visits for symptoms

Birmingham/Atlanta  
Geriatric Research, Education and  
Clinical Center

### Pulmonary Disease

- Dyspnea at rest
- Signs or symptoms of right heart failure
- O<sub>2</sub> sat on O<sub>2</sub> of <88%
- P CO<sub>2</sub> > 50
- Unintentional weight loss

### Dementia

- Inability to walk
- Incontinence
- Less than 6 intelligible words
- Albumin <2.5 or decrease PO intake
- Frequent ER visits

### Liver Disease

- PT > 5 Seconds
- Albumin <2.5
- Refractory Ascites
- SBP
- Jaundice
- Malnutrition and muscle wasting

### Renal Disease

- Not a candidate for dialysis
- Creatinine Clearance of <15 ml/minute
- Serum Creatinine >6.0

### Failure to Thrive

- Frequent ER visits
- Albumin <2.5
- Unintentional Weight loss

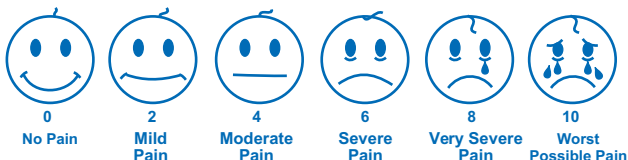

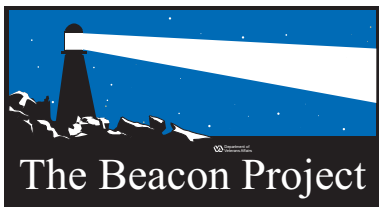

**B**est practices for  
**E**nd of life care  
**A**nd  
**C**omfort care  
**O**rders sets for our  
**N**ation's veterans

## Identifying the Actively Dying Patient

When patients are admitted to the hospital and at regular intervals thereafter, it is important to screen for those who are at highest risk for end-of-life symptoms and who may be *actively dying*.

### Indicators of Patients at High Risk of Entering the Actively Dying Process

1. Pre-existing DNR order
2. LOS in hospital > 7 days
3. Bed Confinement
4. Semi-comatose state
5. Minimal oral intake (receiving IV fluids or tube feeding)
6. Inability or difficulty with taking oral medicine
7. Decline in functional status with no reversible cause
8. Receiving optimum disease modifying therapy (e.g. patient with COPD declining despite aggressive treatment)
9. Failure to improve by 2-3 days post admission
10. Frequent Emergency Room visits or hospitalizations over the last 6 months
11. Primary diagnosis of cancer or dementia

**If one or more of the indicators is present:**

- 1. Review patient status for symptom burden**
- 2. Discuss illness severity with patient and/or family**
- 3. Determine goals of care**
- 4. Document advance directives**

### **Actively Dying Patient Screen**

- 1. Audible retained respiratory secretions**
  - 2. Increased RR (>18-20/minute)**
  - 3. Sustained tachycardia at rest (>100 per minute)**
  - 4. Mottling and cyanosis of extremities**
  - 5. Decreasing level of consciousness**
  - 6. Decreasing pulses**
- The Comfort Care Order Set is used to guide management of symptoms and support for patient and family.**
  - Symptom burden is often very high and not appreciated.**
  - Communication with patient and family regarding care preferences should be proactive.**
  - Patient and family will need support from an interdisciplinary team due to multiple domains of suffering.**

# Birmingham VAMC Safe Harbor Project

## Comfort Care in the Last Hours of Life

Admit to: Location and initiate Comfort Care Order Set

Diagnosis: (i.e. Metastatic Lung Cancer/Pain Crisis)

Condition: Grave

**Resuscitation Preferences; Do Not Attempt to Resuscitation (DNAR)  
(if not, document exact status)**

### Diet:

Order a diet; patient may improve and desire to taste food

(Select from CPRS order set)

Full liquid instead of clear liquid (can advance if tolerated)

(Offer more palatable, easier to swallow, less likely to cause aspiration)

May have food brought in by family

Allow patient to sit up for meals; assist to eat

### Activity:

Allow patient to sit in chair if desired and to use bedside commode

Allow family to stay in room with patient

### Vital Signs:

Minimum frequency allowed by policy

Limit notification orders to those necessary (review options on CPRS)

Frequent monitors can alarm patient and family

Numbers can distract staff/family from patient

### IV Considerations:

Placement is often difficult and painful, frequently has no benefit for patient

Presence of edema indicates that patient is not dehydrated

Many patients have fluid overload, edema and pulmonary congestion

**Oral hydration is a reasonable compromise. (Or)**

**If IV fluids are used, suggest a limited time trial, such as a**

**1000-1500 cc D51/2 NS over 6 hours. (Select from CCOS on CPRS)**

### Subcutaneous (SQ) Line:

Small IV or butterfly needle inserted directly under the skin

(often on the abdomen or thigh)

For injecting small volumes of many medicines when oral route unavailable

Avoids burden of finding/maintaining IV access

### Orders for Dyspnea

Oxygen 2-4 liters nasal prong; avoid face mask

Usually do not recommend monitoring oxygen saturation or telemetry

**For persistent Dyspnea, use opioids**

Blow air on face with bedside fan; turn, reposition, sit up. Nebbs may be helpful

### Hygiene

Avoid Foley catheter if possible (may be helpful for hygiene in select patients, (e.g., obese or immobilized patients)

Diapers and cleansing may accomplish same thing

Delirious patient may pull on bladder catheters

Check all patients for impaction; suppository may be helpful

Consider evaluation by skin care nurse

## Pain and Dyspnea

Opioids are usually the most effective in this setting

Calculate morphine equivalents used in recent past; adjust as needed

Usually stop sustained-released medicines and use immediate release

**Morphine concentrate 20mg/ml concentrate**

- Start with MS 5mg PO to much higher dose based on recent use q 2 hours, Offer, patient may refuse**
- Morphine Sulfate 2-4 subq q2 hours (1/3 the oral dose) Offer, patient may refuse**
- May use IV but shorter half-life and only RN can administer, difficulty with maintaining IV

## Pain, Dyspnea, Anorexia, Asthenia & Depression

**Dexamethasone 4-8mg PO/SubQ breakfast and lunch**

**Corticosteroids** can have multiple beneficial effects

Less mineral-corticoid effect than Prednisone

Does not have to be given in multiple doses

## Nausea and Delirium (*Phenothiazines*)

- Haloperidol 2mg PO or 1mg Subq Q 2 hours, X3 doses total or until settled then q 6-8 hours PRN**
- Patient > 65 years of age Haloperidol 1mg PO or 0.5mg Subq Q 2 hours, X3 doses total or until settled.** Nausea usually requires less frequent doses

## Anxiety and Seizures (*Benzodiazepines*)

- Lorazepam 1mg PO/SubQ q6-8 hours prn**
- Patients >65 years of age Lorazepam 0.5mg 1mg PO/SubQ Q 6-8 hours prn**

May be helpful with anxiety

Exercise care as delirium can sometimes be mistaken for anxiety

Effective against seizures only as IV or SQ and not PO

## Death Rattle

- Keep back of throat dry by turning head to side
- Stop IV fluids or tube feeding,
- Use Scopolamine patch topical behind ear q3 days**
- Use Atropine eye drops 2-3 in mouth q4 hours or until patch effective**
- Avoid deep suctioning
- Family can cleanse with sponge sticks

## Tips for Comfort and Safety

Reposition, massage, quietly sit with and speak to patient

Avoid sensory overload (e.g., TV) soft music instead

Use bed minder in lieu of restraints to alarm if patient gets up

## Assisting Family

Advise about alerting other family members as to gravity of patient's status

Facilitate family presence; order permission for family to visit or stay

Arrange visits of military relatives by contacting Red Cross

Arrange visits of incarcerated relatives by contacting warden

Give family the pamphlet *Preparing for Your Loved One's Death*.

**Notify Pastoral Care and Social Work of admission**

**Avoid restraints**

Birmingham/Atlanta  
Geriatric Research, Education and  
Clinical Center

## Birmingham VAMC Safe Harbor Project

# OPIOID EQUIANALGESIC CONVERSION TABLE

(Dosing in mg unless listed)

| ORAL   | OPIOID AGENT                          | IV/IM/SQ |
|--------|---------------------------------------|----------|
| 30     | Morphine (MSC, OSR, Roxanol™)         | 10       |
| 8      | Hydromorphone (Dilaudid™)             | 2        |
| 20     | Methadone(Dolophine™)                 | --       |
| 300    | Meperidine (Demerol™)                 | 100      |
| 30     | Oxycodone (Roxicodone™, OxyContin™)   | --       |
| 4 tabs | Oxycodone 5mg/APAP 325mg (Percocet™)  | --       |
| 6 tabs | Hydrocodone 5mg/APAP 500mg (Lortab5™) | --       |
| 6 tabs | Codeine 30mg/APAP (Tylenol #3™)       | --       |
| 200+   | Codeine                               | --       |

### FENTANYL PATCH CONVERSION

25mcg/hour topically exchanged every 72 hours

Is equivalent to the following:

Morphine 15mg IV or 45mg PO per day

Hydromorphone 3mg IV or 12mg PO per day

Percocet™/ Lortab5 /Tylenol #3™ - 9 tabs per day

### PCA Dosing

#### Usual Initial PCA Dosing

Morphine 1-2mg (10mg/ml)

Hydromorphone 0.25mg-.5mg (0.5mg/ml)

- INTERVAL LOCK-OUT: every 10-15 minutes
- FOUR HOUR LIMIT: none

1. After 24-48 hours of consistent PCA use for chronic pain, Continuous Hourly Infusion Rate may be set at 50-75% of the daily PCA use. If a Continuous Hourly Infusion Rate is initiated, the PCA Dose should be adjusted to 50-100% of this Continuous Hourly Infusion Rate every 10-15 minutes based on patient's response.
2. Decrease the Continuous Hourly Rate as PCA use declines to avoid overmedication.
3. Never use a Continuous Rate in acute pain of a limited nature.

**Birmingham/Atlanta**  
**Geriatric Research, Education and**  
**Clinical Center**



- Dosing tables only provide conversion estimates. Patient response may differ. Consider partial cross-tolerance when rotating to a new opioid. A well-controlled patient may require a 25% or greater dose reduction of the newly chosen agent. Opiate agonists have different durations of action, extent of oral absorption, and elimination, which may affect patient response.
- Methadone has a longer elimination half-life than duration of action and may require dose adjustment to prevent over accumulation.
- Meperidine is not indicated for prolonged therapy (greater than five days) and Normeperidine (a metabolite) may lead to seizures in patient with decreased renal function. Oral absorption of Meperidine is less reliable than other opiates and is not recommended. Its absorption, elimination, and toxicity can be affected by many drug interactions that inhibit or enhance its metabolism.
- The daily dose of acetaminophen (Tylenol) should not exceed 4 grams in a 24-hour period. This means that patients can not use more that 8 Lortab or Tylox tablets, or 12 Percocet tablets in a 24-hour period without exceeding this limit. If pain can not be controlled with this number of tablets, opioids not in combination with acetaminophen should be used.
- Darvon and Darvocet are ineffective analgesics, and their use is discouraged.
- Constipation secondary to opioids is common. A large bowel stimulant such as Senna or Dulcolax should be prescribed in conjunction with opioids.
- Oxycotin should not be prescribed at less than a 12-hour interval. MsContin and Oramorp should not be prescribed at less than an 8-hour interval.

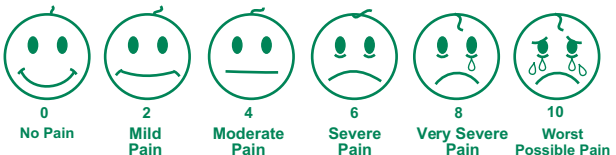

## The Palliative Response ~ Sharing Bad News

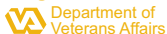

Department of  
Veterans Affairs

### 1 The First Step in Planning Care

- Develop therapeutic relationship
- Discuss patient/family agenda first
- Allow physicians' priorities to flow naturally from patient/family (e.g. discussion of resuscitation and other advanced directives)

### 2 Discussion Agenda

- Physical Care - Setting and level of residential care
- Social Care - Family issues (e.g. dependence)  
Financial issues (e.g. disability)
- Emotional Care - Sources of support
- Spiritual Care - Sources of meaning

### 3 Physician Role and Preparation

- DO NOT DELEGATE sharing bad news!
- Sharing bad news is physician's role
- Patients often accept bad news from MD only
- MD is best prepared to interpret news and offer advice
- Confirm medical facts
- Plan presentation with one or two main points only
- Use simple, lay language

### 4 Setting the Stage

- Choose appropriate, private environment (hallway/curtain do not provide privacy)
- Have tissue available
- Allot enough time (20-30 minutes minimum with documentation)
- Determine who should be present
- Turn beeper to vibrate to avoid interruptions and demonstrate full attention
- Shake hands with the patient first
- Introduce yourself to everyone in the room
- Always sit at eye level with patient, distance of 50-75 cm
- Ask permission before sitting on edge of bed
- Arrange seating for everyone present if possible so that patient is at ease and not concerned about others' comfort

### 5 Starting the Conversation

- ASK: What does patient/family understand about what is happening? What have others told them?
- WAIT: 15-30 seconds to give opportunity for response
- LISTEN: Response may vary from "I think I am dying," to "I don't understand what is happening."
- ASK: How much that patient wants to know?  
Does patient want to know prognosis?  
(Patient may decline voluntarily and designate another person as spokesperson)

Birmingham/Atlanta  
Geriatric Research, Education and  
Clinical Center

## The Palliative Response ~ Sharing Bad News

### 6 When Family Wants to "Protect" Patient

- Honor patient's autonomy
- Meet legal obligation for consent
- Promote family alliance and support for the patient
- Ask what family is afraid will happen
- Offer to have family present when you speak to patient so family members can hear patient's wishes about knowing status/prognosis

### 7 Sharing Bad News

- Give a warning to allow people to prepare
- Briefly state one or two key points only
- Use simple language

#### + STOP +

- Ask questions to assess understanding
- Address key considerations
- Do not minimize severity of news
- Recommended statement for terminal illness:
  - "This is an illness that man cannot cure."
- Statement shows medical humility, leaves open possibility of the miraculous, and helps shift focus from "cure" to Palliation and Support

### 8 Response to Emotions of Patient, Family and Staff

- Be prepared for a range of emotions
- Address key components of response
- Allow time for response
- Communicate nonverbally as well as verbally- it is usually acceptable to touch patient's ARM

### 9 Suggest a Brief Plan

- Medical Plan ( e.g. control dyspnea, home assistance to help deal with weakness)
- Ancillary Support (e.g. social work visits, pastoral care visits)
- Introduce Advance Care Planning
  - "Sometimes when people die, doctors try to bring them back to life . . . have you considered whether or not you want this?"
- Discuss Timeline

### 10 Offer Follow-up Meeting

- When? Usually within 24 hours
- Who? For current and additional family members
- Why? To repeat portions of the news
- How? Offer to contact absent family members  
Get permission to share news if necessary
- What? Next meeting, upcoming decisions, suggest flexible timetable

### 11 Ending the Meeting

- ASK "Do you have any questions?"
- WAIT
- ANSWER
- STAND an effective way to end the conversation

# The Palliative Response Guidelines for Pronouncement

## Preparation before Death Pronouncement

Be prepared to answer pertinent questions  
Nursing staff can provide wealth of information  
Know recent events, family response and dynamics,  
and special problems or concerns

## Assess Immediate Situation

Death expected or sudden?

Family present or notified?

Attending notified?

Autopsy

Determine family preference

Consider value of autopsy

Organ Donation

If family requests, contact organ donation  
counselor to discuss details

Faith Tradition

Consider Pastoral Care contacts

Honor requirements/procedures/rituals

## Entering the Room

Assume quiet, respectful attitude

Ask nurse to accompany for introductions

Introduce yourself and role: ***"I am the doctor on call"***

Determine relationships of persons present

Inform family of purpose; invite to them to remain

Empathize simply:

***"I am sorry for your loss; this is a difficult time"***

## Pronouncement Procedure Clinical Examination

Check ID bracelet and pulse

Check pupils for position and response to light

Check response to tactile stimuli

Examine respectfully:

**No Sternal Rubs or Nipple Pinches**

Check for spontaneous respiration

Check for heart sound and pulses

Record time of death

Birmingham/Atlanta  
Geriatric Research, Education and  
Clinical Center

## Follow-Up

### ***When You Are Patient's Physician***

Invite family to contact you over the next few days, weeks, or months if questions arise or problems occur

### ***When You Are Physician on Call***

Assure family you will report death to the attending physician, whom they may contact with questions or concerns

## Death Note in Chart

- Document date and time
- Document name of provider pronouncing death
- Provide brief statement of cause of death
- Note absence of pulse, respiration, pupil response
- Note if family present or informed
- Note family response if indicated
- Note notification of attending, pastoral care, social work or others as appropriate

## Death Certificate

Locate sample Death Certificate on unit  
Complete marked sections. Write neatly in black ink.  
Begin again if make an error (cross-outs not allowed)

### ***Document cause of death -***

**Primary** cause of death - Example - Pneumonia

**Secondary** cause of death - Example - Advanced Alzheimer's Dementia

**Contributing** cause of death - Example - Agent Orange, Asbestosis. List other illnesses possibly linked to patient's disability or service-connection

Documentation assists family to obtain benefits  
Families appreciate and respond to a respectful and kind approach to this final medical act

## If families should contact you later

- Take time
- Inquire about family members
- Listen carefully
- Respond empathically

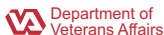

**Death Pronouncement is the Final Medical Act  
Handle with Care**
